1 **Loss of UGP2 in brain leads to a severe epileptic encephalopathy, emphasizing that bi-**  
2 **allelic isoform specific start-loss mutations of essential genes can cause genetic diseases**

3 Elena Perenthaler<sup>1</sup>, Anita Nikoncuk<sup>1\*</sup>, Soheil Yousefi<sup>1\*</sup>, Woutje M. Berdowski<sup>1\*</sup>, Ivan Capo<sup>2</sup>, Herma C.  
4 van der Linde<sup>1</sup>, Paul van den Berg<sup>1</sup>, Edwin H. Jacobs<sup>1</sup>, Darija Putar<sup>1</sup>, Mehrnaz Ghazvini<sup>3</sup>, Eleonora  
5 Aronica<sup>4,5</sup>, Wilfred F.J. van IJcken<sup>6</sup>, Walter G. de Valk<sup>1</sup>, Evita Medici-van den Herik<sup>7</sup>, Marjon van  
6 Slegtenhorst<sup>1</sup>, Lauren Brick<sup>8</sup>, Mariya Kozenko<sup>8</sup>, Jennefer N. Kohler<sup>9</sup>, Jonathan A. Bernstein<sup>10</sup>, Kristin G.  
7 Monaghan<sup>11</sup>, Amber Begtrup<sup>11</sup>, Rebecca Torene<sup>11</sup>, Amna Al Futaisi<sup>12</sup>, Fathiya Al Murshedi<sup>13</sup>, Renjith  
8 Mani<sup>12</sup>, Faisal Al Azri<sup>14</sup>, Erik-Jan Kamsteeg<sup>15</sup>, Majid Mojarrad<sup>16,17,18</sup>, Atieh Eslahi<sup>16,19</sup>, Zaynab Khazaeli<sup>20</sup>,  
9 Fateme Massinaei Darmiyan<sup>20</sup>, Mohammad Doosti<sup>21</sup>, Ehsan Ghayoor Karimiani<sup>22</sup>, Jana Vandrovцова<sup>23</sup>,  
10 Faisal Zafar<sup>24</sup>, Nuzhat Rana<sup>24</sup>, Krishna K. Kandaswamy<sup>25</sup>, Jozef Hertecant<sup>26</sup>, Peter Bauer<sup>25</sup>, Stephanie  
11 Efthymiou<sup>23</sup>, Henry Houlden<sup>23</sup>, Aida M. Bertoli-Avella<sup>25</sup>, Reza Maroofian<sup>23</sup>, Kyle Retterer<sup>11</sup>, Alice S.  
12 Brooks<sup>1</sup>, Tjakko J. van Ham<sup>1</sup> and Tahsin Stefan Barakat<sup>1,#</sup>

13

14 <sup>1</sup>Department of Clinical Genetics, Erasmus MC University Medical Center, Rotterdam, The Netherlands

15 <sup>2</sup>Department for Histology and Embryology, Faculty of Medicine Novi Sad, University of Novi Sad, Serbia

16 <sup>3</sup>iPS cell core facility, Erasmus MC University Medical Center, Rotterdam, The Netherlands

17 <sup>4</sup>Amsterdam UMC, University of Amsterdam, Department of (Neuro)pathology, Amsterdam, Amsterdam  
18 Neuroscience, The Netherlands

19 <sup>5</sup>Stichting Epilepsie Instellingen Nederland (SEIN), The Netherlands

20 <sup>6</sup>Center for Biomics, Department of Cell Biology, Erasmus MC University Medical Center, Rotterdam, The  
21 Netherlands

22 <sup>7</sup>Department of Neurology, Erasmus MC University Medical Center, Rotterdam, The Netherlands

23 <sup>8</sup>Division of Genetics, McMaster Children's Hospital, Hamilton, Ontario, L8S 4J9, Canada.

24 <sup>9</sup>Division of Cardiovascular Medicine, Stanford University School of Medicine, Stanford, CA, 94035, USA

25 <sup>10</sup>Department of Pediatrics, Division of Medical Genetics, Stanford University School of Medicine, Stanford, CA  
26 94035, USA

27 <sup>11</sup>GeneDx, Gaithersburg, MD, 20877, USA

28 <sup>12</sup>Department of Child health, college of Medicine and Health Sciences, Sultan Qaboos University, Muscat,  
29 Oman

30 <sup>13</sup>Genetic and Developmental Medicine Clinic, Sultan Qaboos University Hospital, Muscat, Oman

31 <sup>14</sup>Department of Radiology and molecular imaging, Sultan Qaboos University Hospital, Muscat, Oman

32 <sup>15</sup>Department of Clinical Genetics, Radboud University, Nijmegen, The Netherlands

33 <sup>16</sup>Department of Medical Genetics, Faculty of Medicine, Mashhad University of Medical Sciences, Mashhad,  
34 Iran

35 <sup>17</sup>Medical Genetics Research Center, Mashhad University of Medical Sciences, Mashhad, Iran

36 <sup>18</sup>Genetic Center of Khorasan Razavi, Mashhad, Iran

37 <sup>19</sup>Student Research Committee, Faculty of Medicine, Mashhad University of Medical Sciences, Mashhad, Iran

38 <sup>20</sup>Genetic Counseling Center, Welfare Organization of Sistan and Baluchestan, Zahedan, Iran

39 <sup>21</sup>Department of Modern Sciences and Technologies, Faculty of Medicine, Mashhad University of Medical  
40 Sciences, Mashhad, Iran.

41 <sup>22</sup>Genetics Research Centre, Molecular and Clinical Sciences Institute, St. George's, University, London, SW17  
42 ORE, United Kingdom

43 <sup>23</sup>Department of Neuromuscular Disorders, UCL Queen Square Institute of Neurology, London, WC1N 3BG,  
44 United Kingdom.

45 <sup>24</sup>Department of Paediatric Neurology, Children's hospital and institute of Child health, Multan 60000, Pakistan

46 <sup>25</sup>CENTOGENE AG, Rostock, Germany

47 <sup>26</sup>Department of Pediatrics, Tawam Hospital, and College of Medicine and Health Sciences, UAE University, Al-  
48 Ain, UAE

49

50 \* equal contribution, shared second author

51 # corresponding Author: [t.barakat@erasmusmc.nl](mailto:t.barakat@erasmusmc.nl)

52  
53  
54  
55  
56  
57  
58  
  
59  
  
60  
  
61  
62  
63  
64  
65  
66  
67  
68  
69  
70  
71  
72  
73  
74  
75  
76  
77  
78  
  
79  
  
80  
  
81  
  
82  
  
83  
  
84  
  
85  
  
86  
  
87

Running title: Loss of UGP2 causes a severe epileptic encephalopathy

Key words: epileptic encephalopathy, UGP2, ATG mutations, start-loss mutation, genetics, whole exome sequencing, microcephaly, recurrent mutation, founder mutation, essential gene

## Abstract:

Developmental and/or epileptic encephalopathies (DEEs) are a group of devastating genetic disorders, resulting in early onset, therapy resistant seizures and developmental delay. Here we report on 12 individuals from 10 families presenting with a severe form of intractable epilepsy, severe developmental delay, progressive microcephaly and visual disturbance. Whole exome sequencing identified a recurrent, homozygous variant (chr2:64083454A>G) in the essential *UDP-glucose pyrophosphorylase (UGP2)* gene in all probands. This rare variant results in a tolerable Met12Val missense change of the longer UGP2 protein isoform but causes a disruption of the start codon of the shorter isoform. We show that the absence of the shorter isoform leads to a reduction of functional UGP2 enzyme in brain cell types, leading to altered glycogen metabolism, upregulated unfolded protein response and premature neuronal differentiation, as modelled during pluripotent stem cell differentiation *in vitro*. In contrast, the complete lack of all UGP2 isoforms leads to differentiation defects in multiple lineages in human cells. Reduced expression of Ugp2a/Ugp2b *in vivo* in zebrafish mimics visual disturbance and mutant animals show a behavioral phenotype. Our study identifies a recurrent start codon mutation in *UGP2* as a cause of a novel autosomal recessive DEE. Importantly, it also shows that isoform specific start-loss mutations causing expression loss of a tissue relevant isoform of an essential protein can cause a genetic disease, even when an organism-wide protein absence is incompatible with life. We provide additional examples where a similar disease mechanism applies.

## 88 Introduction:

89 Developmental and/or epileptic encephalopathies (DEEs) are a heterogeneous group of genetic  
90 disorders, characterized by severe epileptic seizures in combination with developmental delay or  
91 regression<sup>1</sup>. Genes involved in multiple pathophysiological pathways have been implicated in DEEs,  
92 including synaptic impairment, ion channel alterations, transporter defects and metabolic processes  
93 such as disorders of glycosylation<sup>2</sup>. Mostly, dominant acting, *de novo* mutations have been identified  
94 in children suffering from DEEs<sup>3</sup>, and only a limited number of genes with a recessive mode of  
95 inheritance are known so far, with a higher occurrence rate in consanguineous populations<sup>4</sup>. A recent  
96 cohort study on DEEs employing whole exome sequencing (WES) and copy-number analysis,  
97 however, found that up to 38% of diagnosed cases might be caused by recessive genes, indicating  
98 that the importance of this mode of inheritance in DEEs has been underestimated<sup>5</sup>.

99 The human genome contains ~20,000 genes of which more than 5,000 have been implicated in  
100 genetic disorders. Wide-scale population genomics studies and CRISPR-Cas9 based loss-of-function  
101 (LoF) screens have identified around 3000-7000 genes that are essential for the viability of the  
102 human organism or result in profound loss of fitness when mutated. In agreement with that they are  
103 depleted for LoF variants in the human population<sup>6</sup>. For some of these essential genes it is believed  
104 that LoF variants are incompatible with life and are therefore unlikely to be implicated in genetic  
105 disorders presenting in postnatal life<sup>7</sup>. One such example is the *UDP-glucose pyrophosphorylase*  
106 (*UGP2*) gene at chromosome 2. *UGP2* is an essential octameric enzyme in nucleotide-sugar  
107 metabolism<sup>8-10</sup>, as it is the only known enzyme capable of catalyzing the conversion of glucose-1-  
108 phosphate to UDP-glucose<sup>11,12</sup>. UDP-glucose is a crucial precursor for the production of glycogen by  
109 *glycogen synthase* (*GYS*)<sup>13,14</sup>, and also serves as a substrate for *UDP-glucose:glycoprotein transferases*  
110 (*UGGT*) and *UDP-glucose-6-dehydrogenase* (*UGDH*), thereby playing important roles in glycoprotein  
111 folding control, glycoconjugation and UDP-glucuronic acid synthesis. The latter is an obligate  
112 precursor for the synthesis of glycosaminoglycans and proteoglycans of the extracellular matrix<sup>15,16</sup>,  
113 of which aberrations have been associated with DEEs and neurological disorders<sup>17-20</sup>. *UGP2* has  
114 previously been identified as a marker protein in various types of malignancies including gliomas  
115 where its upregulation is correlated with a poor disease outcome<sup>21-28</sup>, but has so far not been  
116 implicated in genetic diseases and it has been speculated that this is given its essential role in  
117 metabolism<sup>8</sup>.

118 Many genes are differentially expressed amongst tissues, regulated by non-coding regulatory  
119 elements<sup>29</sup>. In addition, it has become clear that there are more than 40,000 protein isoforms  
120 encoded in the human genome, whose expression levels vary amongst tissues. Although there are  
121 examples of genetic disorders caused by the loss of tissue specific protein isoforms<sup>30-33</sup>, it is unknown  
122 whether a tissue-relevant loss of an essential gene can be involved in human disease. Here, we  
123 report on such a scenario, providing evidence that a novel form of a severe DEE is caused by the  
124 brain relevant loss of the essential gene *UGP2* due to an isoform specific and germ line transmitted  
125 start codon mutation. We present data that this is likely a more frequent disease mechanism in  
126 human genetics, illustrating that essential genes for which organism-wide loss is lethal can still be  
127 implicated in genetic disease when only absent in certain tissues due to expression misregulation.

128

## 129 Results:

### 130 *A recurrent ATG mutation in UGP2 in 12 individuals presenting with a severe DEE*

131 We encountered a three-month old girl (**Figure 1A**, family 1, individual 1), that was born as the first  
132 child to healthy non-consanguineous Dutch parents, by normal vaginal delivery after an uneventful  
133 pregnancy conceived by ICSI. She presented in the first weeks of life with irritability and jitteriness,  
134 that developed into infantile spasms and severe epileptic activity on multiple  
135 electroencephalograms, giving rise to a clinical diagnosis of West syndrome (**Figure 1B**). Despite the  
136 use of multiple anti-epileptic drugs, including ACTH and a ketogenic diet, seizures remained  
137 intractable and occurred daily. Severe developmental delay was evident without acquisition of any  
138 noticeable developmental milestones, causing the need for gastrointestinal tube feeding. Visual  
139 tracking was absent, and foveal hypopigmentation, hypermetropia and mild nystagmus were noticed  
140 upon ophthalmological investigation. MRI brain imaging showed no gross structural abnormalities or  
141 migration disorders at the age of 4 months, but displayed reduced white matter, that further  
142 developed into global atrophy with wide sulci and wide pericerebral liquor spaces at the age of 17  
143 months (**Figure 1C, Supplementary Figure 1B**). At that time, she had become progressively  
144 microcephalic, with a head circumference of -2.96 SD at the last investigation at 23 months of age  
145 (**Supplementary Figure 1A**). She showed a number of minor dysmorphisms, including a sloping  
146 forehead, elongated head with suture ridging, bitemporal narrowing, a relatively small mouth and  
147 large ears (**Figure 1A**). Neurological examination showed brisk, symmetric deep tendon reflexes,  
148 more pronounced at the upper limbs. Routine investigations, including metabolic screening in urine,  
149 plasma and cerebrospinal fluid were normal. A SNP-array showed a normal female chromosomal  
150 profile, with a large, ~30 Mb run of homozygosity (ROH) at chromosome 2, and a few smaller ROH  
151 regions, adding up to 50 Mb ROH regions in total, pointing to an unrecognized common ancestor of  
152 both parents (coefficient of inbreeding 1/64). Subsequent trio WES did not show any disease-causing  
153 variants in known DEE genes, but identified a homozygous variant (chr2:64083454A>G) in *UGP2*,  
154 located in the large ROH region (**Figure 1D**), with no other disease implicated variants observed in  
155 that region. Both parents were heterozygous carriers of the same variant. Via Genematcher<sup>34</sup> and our  
156 network of collaborators, we identified 11 additional individuals from 9 unrelated families (of which  
157 8 were consanguineous), harboring the exact same homozygous variant and presenting with an  
158 almost identical clinical phenotype of intractable seizures, severe developmental delay, visual  
159 disturbance, microcephaly and similar minor dysmorphisms (**Figure 1A, C, E, Supplementary Figure**  
160 **1B, Supplementary Case reports, Supplementary Table 1** for detailed information on 11 cases). Six  
161 of these individuals passed away before the age of 3.5 years. In 4 families, at least 4 already  
162 deceased siblings had a similar phenotype but could not be investigated. Two families were of Indian  
163 descent (both with ancestors from regions currently belonging to Pakistan), living in Canada (family  
164 2) and the USA (family 3), with the remaining families coming from Oman (family 4, originally from  
165 Pakistan), Pakistan (family 5), Iran (family 6, 7 and 8) and UAE (family 9). One additional case in a  
166 family from Oman was identified presenting with intractable seizures and microcephaly, but no  
167 detailed medical information could be obtained at this point.

168 Having identified at least 12 individuals with an almost identical clinical phenotype and an identical  
169 homozygous variant in the same gene, led us to pursue *UGP2* as a candidate gene for a new genetic  
170 form of DEE. *UGP2* is highly expressed in various brain regions (**Figure 1F**), and also widely expressed  
171 amongst other tissues, including liver and muscle according to the data from the GTEx portal<sup>35</sup>

172 **(Supplementary Figure 1D)**. The (chr2:64083454A>G) variant is predicted to cause a missense variant  
173 (c.34A>G, p.Met12Val) in *UGP2* isoform 1 (NM\_006759), and to cause a translation start loss (c.1A>G,  
174 p.?) of *UGP2* isoform 2 (NM\_001001521), referred to as long and short isoform, respectively. The  
175 variant has not been reported in the Epi25 web browser<sup>36</sup>, ClinVar<sup>37</sup>, LOVD<sup>38</sup>, Exome Variant Server<sup>39</sup>,  
176 DECIPHER<sup>40</sup>, GENESIS<sup>41</sup>, GME variome<sup>42</sup> or Iranome databases<sup>43</sup>, is absent from our in-house data  
177 bases and is found only 15 times in a heterozygous, but not homozygous, state in the 280,902 alleles  
178 present in *gnomAD* (MAF: 0.00005340)<sup>44</sup>. In the *GeneDx* unaffected adult cohort, the variant was  
179 found heterozygous 10 times out of 173,502 alleles (MAF: 0.00005764), in the ~10,000 exomes of the  
180 Queen Square Genomic Center database two heterozygous individuals were identified, and out of  
181 45,921 individuals in the *Centogene* cohort, 10 individuals are heterozygous for this variant. The  
182 identified variant has a CADD score (v1.4) of 19.22<sup>45</sup> and Mutation Taster<sup>46</sup> predicted this variant as  
183 disease causing. The nucleotide is strongly conserved over multiple species (**Figure 1G**). Analysis of  
184 WES data from 6 patients did provide evidence of a shared ROH between patients from different  
185 families, indicating that this same variant might represent an ancient mutation that originated some  
186 26 generations ago (**Supplementary Figure 1C**). Interestingly, since most families originally came  
187 from regions of India, Pakistan and Iran, overlapping with an area called Balochistan, this could  
188 indicate that the mutation has originated there around 600 years ago. As Dutch traders settled in  
189 that area in the 17<sup>th</sup> century, it is tempting to speculate that this could explain the co-occurrence of  
190 the variant in these distant places<sup>47</sup>.

#### 191 *Short UGP2 isoform is predominantly expressed in brain and absent in patients with ATG mutations*

192 Both *UGP2* isoforms only differ by 11 amino acids at the N-terminal (**Figure 2A**) and are expected to  
193 be functionally equivalent<sup>8</sup>. To investigate how the A>G variant may cause DEE, we first obtained  
194 fibroblasts from individual 1 (homozygous for the A>G variant) and her heterozygous parents and  
195 analyzed the isoform expression by Western blotting (**Figure 2B**). Whereas the two isoforms were  
196 equally expressed in wild type fibroblasts, the expression of the shorter isoform was diminished to  
197 ~25% of total *UGP2* in heterozygous parents, both of individual 1 (**Figure 2B, C**) and of individual 2  
198 and 3 (**Supplementary figure 2A, B**), and was absent in cells from the affected individual 1 (**Figure 2**  
199 **B, C**; fibroblasts of the affected children in family 2 or other families were not available). Total *UGP2*  
200 levels were not significantly different between the affected child and her parents, or between  
201 parents and wild type controls (**Figure 2D, Supplementary Figure 2C**). This indicates that the long  
202 isoform harboring the Met12Val missense variant is upregulated in fibroblast when the short isoform  
203 is missing. Moreover, this indicates that Met12Val does not affect the stability of the long isoform at  
204 the protein or transcript level (**Supplementary Figure 2D, E, F**). RNA-seq on peripheral blood samples  
205 of family 1 did not identify altered splicing events of *UGP2* and the global transcriptome of the  
206 proband was not different from her parents, although only a limited analysis could be performed as  
207 only a single sample was available for each individual (**Supplementary Figure 2G, H**). Both  
208 homozygous and heterozygous fibroblasts had a similar proliferation rate compared to wild type  
209 fibroblasts (**Figure 2E, Supplementary Figure 2I**), and immunocytochemistry confirmed a similar  
210 subcellular localization of *UGP2* in mutant and wild type cells (**Figure 2F**). We then measured the  
211 enzymatic activity of *UGP2* in wild type, heterozygous and homozygous fibroblasts, and found that  
212 mutant fibroblast had a similar capacity to produce UDP-glucose in the presence of exogenously  
213 supplied glucose-1-phosphate and UTP (**Figure 2G**). Altogether, this indicates that the long *UGP2*  
214 isoform harboring the Met12Val missense change is functional and is therefore unlikely to contribute  
215 to the patient phenotype.

216 As the A>G variant results in a functional long UGP2 isoform but abolishes the translation of the  
217 shorter UGP2 isoform, we next investigated whether the ratio between short and long isoform  
218 differs amongst tissues. If so, the homozygous A>G variant would lead to depletion of UGP2 in tissues  
219 where mainly the short isoform is expressed, possibly below a threshold that is required for normal  
220 development or function. Western blotting on cellular extracts derived from wild type H9 human  
221 embryonic stem cells (ESCs), commercially acquired H9-derived neural stem cells (NSCs) and  
222 fibroblasts (**Figure 3A**) showed that, whereas the ratio between short and long isoform in fibroblasts  
223 was around 0.5, in ESCs it was 0.14 and in NSCs 0.77, indicating that the shorter UGP2 isoform is the  
224 predominant one in NSCs (**Figure 3B**). A similar trend was observed when assessing the transcript  
225 level, both by multiplex RT-PCR and RT-qPCR, using primers detecting specifically the short and long  
226 transcript isoform (**Figure 3C, D, E**). This indicates that differential isoform expression between cell  
227 types is regulated at the transcriptional level, possibly hinting at tissue-specific regulatory elements  
228 driving isoform expression. We next analyzed RNA-seq data from human fetal tissues<sup>48-51</sup> to  
229 determine the fraction of reads covering short versus total *UGP2* transcripts (**Figure 3F**). This showed  
230 that in human fetal brain the short transcript isoform is predominantly expressed. To gain more  
231 insight into the cell type-specific expression of UGP2, we performed immunohistochemistry on  
232 human fetal brain tissues from the first to third trimester of pregnancy (**Figure 3G**). In the  
233 first trimester we found pale labeling of neuropil in the proliferative neuroepithelium of the  
234 hypothalamic, cortical, mesencephalic and thalamic regions (**Figure 3G-A/I, II, III, IV**), as well as the  
235 marginal zone of the spinal cord (**Figure 3G-A/V**) and cuboidal epithelial cells of choroid plexus  
236 (**Figure 3G-A/VI**). During the second trimester, UGP2 positivity was detected in neurons from the  
237 subplate region of the cerebral cortex (**Figure 3G-B/I, II**) and still in some of the cells in the  
238 neuroepithelium and subventricular zone (**Figure 3G-B/III**). Almost the same pattern of UGP2  
239 distribution was found in the cerebral cortex of fetuses from the 3<sup>rd</sup> trimester. Also, we found clear  
240 cytoplasmatic UGP2 expression in neurons from mesencephalic, inferior olivary and cerebellar nuclei  
241 during the second (**Figure 3G-B/IV, V, and VI**) and third trimester, respectively (**Figure 3G-C/IV, V**). In  
242 the white matter of the cerebellum in the third trimester, we identified single positive glial cells  
243 (**Figure 3G-C/VI**). In the cerebellar cortex we did not find specific positivity of cells on UGP2 (**Figure**  
244 **3G-B, C/VII**). Cuboidal epithelial cells of choroid plexus preserved UGP2 positivity during the  
245 second trimester (**Figure 3G-B/VIII**) but lost it in the third trimester (**Figure 3G-C/VIII**). Together this  
246 indicates that UGP2 can be detected in a broad variety of cell types during brain development. On  
247 Western blotting, we noticed preferential expression of the shorter UGP2 isoform in the developing  
248 cortex and cerebellum from gestational weeks 14, 20 and 28 (**Figure 3H**) and in the frontal cortex of  
249 brains from weeks 21 and 23 (**Supplementary Figure 2J**). Together, this supports the hypothesis that  
250 the DEE phenotype in patients is caused by a major loss of functional UGP2 in the brain, as the short  
251 isoform represents virtually all UGP2 produced in this tissue.

252 *Lack of the short UGP2 isoform leads to transcriptome changes upon differentiation into neural stem*  
253 *cells*

254 To model the disease *in vitro*, we first engineered the homozygous A>G mutation in H9 ESCs to study  
255 the mutation in a patient independent genetic background and compare it to isogenic parental cells.  
256 We obtained two independent clones harboring the homozygous A>G change (referred to as knock-  
257 in, KI, mutant) and two cell lines harboring an insertion of an additional A after nucleotide position 42  
258 of *UGP2* transcript 1 (chr2:64083462\_64083463insA) (**Supplementary Figure 3A, B**) (referred to as  
259 knockout, KO). This causes a premature stop codon at amino acid position 47 (D15Rfs\*33), leading to

260 nonsense mediated mRNA decay and complete absence of UGP2 protein (**Supplementary Figure 3C**).  
261 All derived ESCs had a normal morphology and remained pluripotent as assessed by marker  
262 expression (**Supplementary Figure 3D, E**), indicating that the absence of UGP2 in ESCs is tolerated, in  
263 agreement with genome-wide LoF CRISPR screens which did not identify *UGP2* as an essential gene  
264 in ESCs<sup>52,53</sup>. We differentiated wild type, KI and KO ESCs into NSCs, using dual SMAD inhibition  
265 (**Supplementary Figure 4 A-C**). Wild type cells could readily differentiate into NSCs, having a normal  
266 morphology and marker expression, whereas differentiation of KI and KO cells was more variable and  
267 not all differentiations resulted in viable, proliferating NSCs. KO cells could not be propagated for  
268 more than 5 passages under NSC culture conditions (data not shown), which could indicate that the  
269 total absence of UGP2 protein is not tolerated in NSCs. When assessed by Western blotting, total  
270 UGP2 protein levels were reduced in KI cells and depleted in KO cells compared to wild type  
271 (**Supplementary Figure 4D, E**).

272 Next, we performed RNA-seq of wild type, KI and KO ESCs and NSCs to assess how depletion of UGP2  
273 upon NSCs differentiation would impact on the global transcriptome (**Figure 4, Supplementary**  
274 **Figure 5, Supplementary Table 2**). In agreement with normal proliferation and morphology of KI and  
275 KO ESCs, all ESCs shared a similar expression profile of pluripotency associated genes and only few  
276 genes were differentially expressed between the three genotypes (**Supplementary Figure 5C,**  
277 **Supplementary Table 3**). This indicates that the absence of UGP2 in ESCs does not lead to major  
278 transcriptome alterations despite the central role of this enzyme in metabolism. Upon  
279 differentiation, cells from all genotypes expressed NSC markers (**Supplementary Figure 5F**), but when  
280 comparing wild type and KO cells, we observed noticeable changes, that were less pronounced in KI  
281 NSCs but still followed a similar trend (**Figure 4A, B, Supplementary Figure 5D, E**). Gene enrichment  
282 analysis showed that genes downregulated in KO and KI cells were implicated in processes related to  
283 the extra-cellular matrix, cell-cell interactions and metabolism, while genes upregulated in KO and KI  
284 cells were enriched for synaptic processes and genes implicated in epilepsy (**Figure 4C,**  
285 **Supplementary Table 4**). Both KO and KI cells showed an upregulation of neuronal expressed genes,  
286 indicating a tendency to differentiate prematurely. To validate RNA-seq findings, we tested several  
287 genes by RT-qPCR in wild type, KI and KO cells (**Figure 4D**). We also included KO rescue cells, in which  
288 we had restored the expression of either the wild type or the mutant UGP2 long isoform, leading  
289 each to an approximately 4-fold UGP2 overexpression at the NSC state compared to WT  
290 (**Supplementary Figure 4F**). Amongst the tested genes was *NNAT*, which showed a significant  
291 upregulation in KI and KO cells, which was rescued by restoration of UGP2 expression in KO NSCs.  
292 *NNAT* encodes neuronatin that stimulates glycogen synthesis by upregulating glycogen synthase and  
293 was previously found to be upregulated in Lafora disease. This lethal teen-age onset  
294 neurodegenerative disorder presenting with myoclonic epilepsy is caused by mutations in the  
295 ubiquitin ligase malin, leading to accumulation of altered polyglucosans<sup>54</sup>. Malin can ubiquitinate  
296 neuronatin leading to its degradation. As reduced UGP2 expression might impact on glycogen  
297 production, it seems plausible that this results in compensatory *NNAT* upregulation and in  
298 downstream aberrations contributing to the patient phenotypes. Indeed, neuronatin upregulation  
299 was shown to cause increased intracellular Ca<sup>2+</sup> signaling, ER stress, proteasomal dysfunction and cell  
300 death in Lafora disease<sup>55,56</sup>, and was shown to be a stress responsive protein in the outer segment of  
301 retina photoreceptors<sup>57,58</sup>. Another interesting gene upregulated in KI and KO NSCs and  
302 downregulated in rescue cell lines was the autism candidate gene *FGFBP3*<sup>59</sup>. This secreted  
303 proteoglycan that enhances FGF signaling is broadly expressed in brain<sup>60</sup>, and functions as an

304 extracellular chaperone for locally stored FGFs in the ECM, thereby influencing glucose metabolism  
305 by regulating rate-limiting enzymes in gluconeogenesis<sup>61</sup>. Other potentially relevant genes displaying  
306 the same expression trend were the heparan sulphate proteoglycan *GPC2* (a marker of immature  
307 neurons<sup>62,63</sup>), the helix-loop-helix transcription factor *ID4* (a marker of postmitotic neurons<sup>64</sup>), and  
308 the signaling molecule *FGFR3* that has been implicated in epilepsy<sup>65</sup>. Genes downregulated in KO  
309 cells and upregulated in rescue cells included urokinase-type plasminogen activator *PLAU* (deficiency  
310 in mouse models increases seizure susceptibility<sup>66</sup>), the glycoprotein *GALNT7* (upregulation of which  
311 has been found to promote glioma cell invasion<sup>67</sup>) and the brain tumor gene *MYBL1* (that has been  
312 shown to be regulated by *O*-linked *N*-acetylglucosamine<sup>68</sup>). Similar expression changes were observed  
313 in NSCs differentiated from induced pluripotent stem cells (iPSCs) that we had generated from family  
314 1 (**Supplementary Figure 6**). Together, RNA-seq showed that whereas the absence of UGP2 is  
315 tolerated in ESCs, its complete absence or reduced expression results in global transcriptome  
316 changes in NSCs, with many affected genes implicated in DEE relevant pathways.

317

### 318 *Absence of short UGP2 isoform leads to metabolic defects in neural stem cells*

319 To investigate how reduced UGP2 expression levels in KO and KI cells would impact on NSC  
320 metabolism, we investigated the capacity to produce UDP-glucose in the presence of exogenously  
321 supplied glucose-1-phosphate and UTP. KO NSCs showed a severely reduced ability to produce UDP-  
322 glucose (**Figure 5A**). This reduction was rescued by ectopic overexpression of both long wild type and  
323 long mutant UGP2. KI cells showed a slightly reduced activity in ESCs (**Supplementary Figure 7A**), but  
324 a more strongly reduced activity in NSCs compared to wild type (**Figure 5A**), correlating with total  
325 UGP2 expression levels (**Supplementary Figure 4D, E**). Surprisingly, contrary to KO NSCs, KO ESC  
326 showed some residual capacity to produce UDP-glucose despite the complete absence of UGP2  
327 (**Supplementary Figure 7A**). This could indicate that a yet to be identified enzyme can partially take  
328 over the function of UGP2 in ESCs but not NSCs, which might explain the lack of expression changes  
329 in this cell type upon UGP2 loss. iPSCs showed similar results (**Supplementary Figure 7B**). We next  
330 assessed the capacity to synthesize glycogen under low oxygen conditions by PAS staining, as it was  
331 previously shown that hypoxia triggers increased glycogen synthesis<sup>69</sup>. As expected, wild type ESCs  
332 cultured for 48 hours under hypoxia showed an intense cytoplasmic PAS staining in most cells  
333 (**Supplementary Figure 7C, D**), while KO ESCs showed a severely reduced staining intensity. This  
334 indicates that under hypoxia conditions, the residual capacity of ESC to produce UDP-glucose in the  
335 absence of UGP2 is insufficient to produce glycogen. KI ESCs were indistinguishable from wild type  
336 (**Supplementary Figure 7D**). At the NSC state, many KO cells kept at low oxygen conditions for 48  
337 hours died (data not shown) and those KO cells that did survive were completely depleted from  
338 glycogen granules (**Figure 5B, C**). This could be rescued by overexpression of both wild type or  
339 mutant long UGP2 isoform. KI NSCs showed a more severe reduction in PAS staining compared to the  
340 ESC state (**Figure 5B, C**), and we observed similar findings in patient iPSC derived NSCs  
341 (**Supplementary Figure 7E**). Together, this further indicates that upon neural differentiation the  
342 isoform expression switch renders patient cells depleted of UGP2, leading to a reduced capacity to  
343 synthesize glycogen. This can directly be involved in the DEE phenotype, as, besides affecting energy  
344 metabolism, reduction of glycogen in brain has been shown to result in I) impairment of synaptic  
345 plasticity<sup>70</sup>; II) reduced clearance of extracellular potassium ions leading to neuronal  
346 hypersynchronization and seizures<sup>71-73</sup>; and III) altered glutamate metabolism<sup>74</sup>. To investigate how



347 reduced UDP-glucose levels would impact on glycosylation, we next, investigated glycosylation levels  
348 by means of LAMP2, a lysosomal protein known to be extensively glycosylated both by N-linked and  
349 O-linked glycosylation<sup>75</sup>. We found that KO NSCs show hypoglycosylation of LAMP2 that is rescued by  
350 the over expression of both WT and mutant long isoform (**Figure 5D**). In contrast, in ESCs no  
351 glycosylation defects were noticed (**Supplementary Figure 7F**). Finally, we investigated whether the  
352 absence of UGP2, affecting protein glycosylation, could induce ER stress and thus unfolded protein  
353 response (UPR). Whereas in ESCs, the absence of UGP2 did not result in a detectable effect on UPR  
354 markers (**Supplementary Figure 7G**), in NSCs we noticed an increased expression of these genes both  
355 in KO and in KI cells (**Figure 5E**). This indicates that NSCs having UGP2 levels under a certain threshold  
356 are more prone to ER-stress and UPR. In agreement with this, we did not observe upregulation of  
357 UPR markers in patient derived fibroblast, which have similar total UGP2 expression levels compared  
358 to controls (**Supplementary Figure 7H**). Together this indicates that upon differentiation to NSCs, KI  
359 cells become sufficiently depleted of UGP2 to have reduced synthesis of UDP-glucose, leading to  
360 defects in glycogen synthesis and protein glycosylation and to the activation of UPR response.  
361 Alterations of these crucial processes are likely to be implicated in the pathogenesis leading to  
362 increased seizure susceptibility, altered brain microstructure and progressive microcephaly.

363 *Ugp2a and Ugp2b double mutant zebrafish recapitulate metabolic changes during brain*  
364 *development, have an abnormal behavioral phenotype, visual disturbance, and increased seizure*  
365 *susceptibility*

366 Finally, to model the consequences of the lack of UGP2 *in vivo*, we generated zebrafish mutants for  
367 both *ugp2a* and *ugp2b*, the zebrafish homologs of *UGP2*, using CRISPR-Cas9 injections in fertilized  
368 oocytes in a background of a radial glia/neural stem cell reporter<sup>76</sup>. Double homozygous mutant lines  
369 having frameshift deletions for both genes confirmed by Sanger sequencing could be generated but  
370 the only viable combination, obtained with *ugp2a* loss, created a novel ATG in exon 2 of *ugp2b*,  
371 leading to a hypomorphic allele (**Figure 6A**). Homozygous *ugp2a/b* mutant zebrafish had a normal  
372 gross morphology of brain and radial glial cells (**Figure 6B**), showed a largely diminished activity to  
373 produce UDP-glucose in the presence of exogenously supplied glucose-1-phosphate and UTP (**Figure**  
374 **6C**), and showed a reduction in c-FOS expression levels, indicating reduced global neuronal activity  
375 (**Figure 6D**). To monitor possible spontaneous seizures, we performed video tracking experiments of  
376 developing larvae under light-dark cycling conditions at 5 days post fertilization (dpf). Control larvae  
377 show increased locomotor activity under light conditions, and although *ugp2* double mutant larvae  
378 still responded to increasing light conditions, they showed a strongly reduced activity (**Figure 6E, F**).  
379 This could indicate that their capability to sense visual cues is diminished, or that their tectal  
380 processing of visual input is delayed, resulting in reduced movements. Strikingly, upon careful  
381 inspection, we noticed that *ugp2* double mutant larvae did not show spontaneous eye movements,  
382 in contrast to age-matched control larvae (**Figure 6G, Supplemental Movie 1 and 2**). Whereas we did  
383 not observe an obvious spontaneous epilepsy phenotype in these double mutant larvae, upon  
384 stimulation with 4-aminopyridine (4-AP), a potent convulsant, double mutant larvae showed an  
385 increased frequency and duration of movements at high velocity compared to controls, which might  
386 indicate an increased seizure susceptibility (**Figure 6H, I**). Taken together, severely reduced  
387 Ugp2a/Ugp2b levels result in a behavior defect with reduced eye movements, indicating that also in  
388 zebrafish Ugp2 plays an important role in brain function.

389 *UGP2 is an essential gene in humans and ATG mutations of tissue specific isoforms of essential genes*  
390 *potentially cause more rare genetic diseases*

391 Several lines of evidence argue that UGP2 is essential in humans. First, no homozygous LoF variants  
392 or homozygous exon-covering deletions for *UGP2* are present in *gnomAD* or *GeneDx* controls, and  
393 homozygous variants in this gene are limited to non-coding changes, synonymous variants and 5  
394 missense variants, together occurring only 7 times homozygous (**Supplementary Table 5**). Also, no  
395 homozygous or compound heterozygous *UGP2* LoF variants were found in published studies on  
396 dispensable genes in human knockouts<sup>77-79</sup>, or in the *Centogene* (*CentoMD*) or *GeneDx* patient  
397 cohorts, encompassing together many thousands of individuals, further indicating that this gene is  
398 intolerant to loss-of-function in a bi-allelic state. In addition, no homozygous deletions of the region  
399 encompassing *UGP2* are present in DECIPHER<sup>40</sup> or ClinVar<sup>37</sup>. Second, *UGP2* has been identified as an  
400 essential gene using gene-trap integrations<sup>80</sup> and in CRISPR-Cas9 LoF screens in several human cell  
401 types<sup>81-85</sup>. Finally, studies in yeast<sup>86,87</sup>, fungus<sup>88</sup> and plants<sup>89-91</sup> consider the orthologs of *UGP2* as  
402 essential, and the absence of *Ugp2* in mice is predicted to be lethal<sup>92</sup>. In flies, homozygous UGP  
403 knock-outs are lethal while only hypomorphic compound heterozygous alleles are viable but have a  
404 severe movement defect with altered neuromuscular synaptogenesis due to glycosylation defects<sup>93</sup>.  
405 To further investigate the essentiality of UGP2, we performed differentiation experiments of our WT,  
406 KO and rescue ESCs. Differentiation of KO ESCs into hematopoietic stem cells (HSCs) resulted in  
407 severe downregulation of *GATA2* compared to wild type cells, and this was restored in rescue cell  
408 lines (**Figure 7A**). *GATA2* is a key transcription factor in the developing blood system, and knockout of  
409 *Gata2* is embryonic lethal in mice due to defects in HSC generation and maintenance<sup>94,95</sup>.  
410 Differentiation of ESCs into cardiomyocytes similarly affected key marker gene expression in KO cells,  
411 and these changes were restored upon UGP2 rescue (**Figure 7B, C**). Whereas WT ESCs could generate  
412 beating cardiomyocytes after 10 days, these were not seen in KO ESCs. Taken together this argues  
413 that the complete absence of UGP2 in humans is probably incompatible with life, a hypothesis that  
414 cannot be tested directly. However, if true, this could well explain the occurrence of the unique  
415 recurrent mutation in all cases presented herein. Given the structure of the *UGP2* locus (**Figure 2A**),  
416 every LoF variant would affect either the long isoform, when located in the first 33 nucleotides of the  
417 cDNA sequence, or both the short and long isoform when downstream to the ATG of the short  
418 isoform. Therefore, the short isoform start codon is the only mutational target that can disrupt  
419 specifically the short isoform. In this case, the Met12Val change introduced into the long isoform  
420 does not seem to disrupt UGP2 function to such an extent that this is intolerable and therefore  
421 allows development to proceed for most tissues. However, the lack of the short UGP2 isoform  
422 caused by the start codon mutation results in a depletion of functional UGP2 in tissues where  
423 normally the short isoform is predominantly expressed. In brain this reduction diminishes total UGP2  
424 levels below a threshold for normal development, causing a severe epileptic encephalopathy  
425 syndrome. Given the complexity of the human genome with 42976 transcripts with RefSeq peptide  
426 IDs, perhaps also other genetic disorders might be caused by such tissue restricted depletion of  
427 essential proteins. Using a computational homology search of human proteins encoded by different  
428 isoforms, we have identified 1766 genes that share a similar structure to the *UGP2* locus (e.g. a  
429 shorter protein isoform that is largely identical to the longer protein isoform, translated from an ATG  
430 that is contained within the coding sequence of the long isoform) (**Figure 7D**). When filtering these  
431 genes for 1) those previously shown to be essential<sup>6</sup>, 2) not associated with disease (e.g. no OMIM  
432 phenotype) and 3) those proteins where the shorter isoform is no more than 50 amino acids

433 truncated at the N-terminal compared to the longer isoform, we identified 247 genes  
434 (**Supplementary Table 6**). When comparing the ratios of isoform specific reads obtained from  
435 different fetal RNA-seq data<sup>48-51</sup> we noticed that many of these genes show differential isoform  
436 expression amongst multiple tissues, with many genes showing either expression of the long or the  
437 short isoform in a particular tissue (**Figure 7E**). Homozygous LoF variants or start codon altering  
438 mutations in these genes are rare in *gnomAD* (**Supplementary Table 7**), and it is tempting to  
439 speculate that mutations in start codons of these genes could be associated with human genetic  
440 diseases, as is the case for *UGP2*. Using mining of data from undiagnosed patients from our own  
441 exome data base, the Queen Square Genomic Center database and those from *Centogene* and  
442 *GeneDx*, we found evidence for several genes out of the 247 having rare, bi-allelic variants affecting  
443 the start codon of one of the isoforms that could be implicated in novel disorders (*unpublished*  
444 *observations*) and give one such example in the **Supplementary Note**. Together, these findings  
445 highlight the relevance of mutations resulting in tissue-specific protein loss of essential genes for  
446 genetic disorders.

447

448

449

450

451

452

453

454

455

456

457

458

459

460

461

462

## 463 Discussion:

464 Here we describe a recurrent variant in 12 individuals from 10 families, affecting the start codon of  
465 the shorter isoform of the essential gene *UGP2* as a novel cause of a severe DEE. Using *in vitro* and *in*  
466 *vivo* disease modeling, we provide evidence that the reduction of *UGP2* expression in brain cells  
467 leads to global transcriptome changes, a reduced ability to produce glycogen, alterations in  
468 glycosylation and increased sensitivity to ER stress, which together can explain the phenotype  
469 observed in the patients. Most likely our findings *in vitro* underestimate the downstream effects in  
470 patient cells, as in fetal brain the longer isoform expression is almost completely silenced and  
471 virtually all *UGP2* comes from the shorter isoform, which in patient cells cannot be translated. During  
472 our *in vitro* NSC differentiation this isoform switch is less complete, leaving cells with the patient  
473 mutation with some residual *UGP2*. Strikingly, the clinical phenotype seems to be very similar in all  
474 cases, including intractable seizures, absence of developmental milestones, progressive microcephaly  
475 and a disturbance of vision, with retinal pigment changes observed in all patients who had  
476 undergone ophthalmological examination. Also, all patients seem to share similar, although mild,  
477 dysmorphisms, possibly making this condition a recognizable syndrome.

478 The involvement of *UGP2* in genetic disease is surprising. Given its central role in nucleotide-sugar  
479 metabolism it is expected that loss of this essential protein would be incompatible with life, and  
480 therefore loss-of-function should not be found in association with postnatal disease. Our data argue  
481 that indeed a total absence of *UGP2* in all cells is lethal, but that tissue-specific loss, as caused here  
482 by the start codon alteration of an isoform important for brain, can be compatible with postnatal  
483 development but still results in a severe phenotype. Given that any other LoF variant across this gene  
484 would most likely affect both protein isoforms, this could also explain why only a single mutation is  
485 found in all individuals. The fact that the Met12Val long isoform was able to rescue the full KO  
486 phenotype indicates that the missense change introduced to the long protein isoform does not affect  
487 *UGP2* function. As other variants at this start codon, even heterozygous, are not found, possibly  
488 missense variants encoding for leucine, lysine, threonine, arginine or isoleucine (e.g. amino acids that  
489 would be encoded by alternative changes affecting the ATG codon) at this amino acid location in the  
490 long isoform could not produce a functional protein and are therefore not tolerated. Although start  
491 codon mutations have previously been implicated in disease<sup>96,97</sup>, there are no reports, to our  
492 knowledge, on disorders describing start codon alterations of other essential genes, leading to  
493 alterations of tissue specific isoforms. Using a genome-wide homology search, we have identified a  
494 large list of other essential genes with a similar locus structure and variable isoform expression  
495 amongst tissues, where similar ATG altering variants could affect tissue-relevant expression. An  
496 intriguing question is why evolution has resulted in a large number of genes encoding almost  
497 identical protein isoforms. It will be interesting to further explore the mutational landscape of these  
498 genes in cohorts of currently unexplained patients.

499

500

501

502

## 503 Author contributions:

504 EP performed molecular biology experiments, with help from AN and DP. HvdL, WB and TvH  
505 performed zebrafish work. PvdB and EHJ performed enzymatic analyses. IC performed brain  
506 immunohistochemistry and supplied tissues samples. EA supplied tissue samples. MG generated  
507 iPSCs. WvI and WGdV performed and SY analysed RNA-seq. SY performed gene homology search.  
508 Patient recruitment and diagnosing was performed in the different families as follows: Family 1: TSB,  
509 ASB, and EM phenotyped patient 1, MvS analysed WES; Family 2: LB and MK phenotyped patient 2  
510 and 3, KGM, AB, KR analyzed WES; Family 3: JNK and JB phenotyped patient 4, KGM, AB, KR analyzed  
511 WES. Family 4: AaF, FaM, RM and FaA phenotyped patient 5, EJK analyzed WES; Family 5: FZ and NR  
512 phenotyped patient 6, SE, HH analyzed WES; Family 6, family 7 and family 8: MM, AE, ZK, FMD, MD,  
513 EGK phenotyped patients 7-10, JV, RM, HH analyzed WES; Family 9: JH phenotyped patient 11, KKK,  
514 ABA analysed WES; RT, KR, KKK, PB, ABA, RM, HH provided genetic data for population analysis. TSB  
515 identified patient 1, conceived the study, obtained funding, supervised the lab work and wrote the  
516 manuscript, with input from all main authors. All authors approved the final version of the  
517 manuscript.

## 518 Acknowledgements

519 We are indebted to the parents of the patients for their kind cooperation. We thank Virginie  
520 Verhoeven and Gerben Schaaf for critically reading our manuscript and Grazia Mancini for helpful  
521 discussions. We thank Gerben Schaaf for providing the LAMP2 antibody, and Eskeatnaf Mulugeta for  
522 bioinformatics advice. DP was supported by an Erasmus+ Traineeship Programme. HH is supported  
523 by the Rosetree Trust, Ataxia UK, MSA Trust, Brain Research UK, Muscular Dystrophy UK, Muscular  
524 Dystrophy Association (MDA USA), Higher Education Commission of Pakistan, The MRC  
525 (MR/S01165X/1, MR/S005021/1, G0601943), Wellcome Trust (WT093205MA, WT104033AIA and the  
526 Synaptopathies Strategic Award, 165908) and the National Institute for Health Research University  
527 College London Hospitals Biomedical Research Centre. Families 5, 6, 7 and 8 were collected as part of  
528 the SYNAPS Study Group collaboration funded by The Wellcome Trust and strategic award  
529 (Synaptopathies) funding. Research for these families was conducted as part of the Queen Square  
530 Genomics group at University College London, supported by the National Institute for Health  
531 Research University College London Hospitals Biomedical Research Centre. TVH is supported by an  
532 Erasmus University Rotterdam (EUR) fellowship. TSB's lab is supported by the Netherlands  
533 Organisation for Scientific Research (ZonMW Veni, grant 91617021), a NARSAD Young Investigator  
534 Grant from the Brain & Behavior Research Foundation, an Erasmus MC Fellowship 2017 and Erasmus  
535 MC Human Disease Model Award 2018. TSB, IC and EA acknowledge support from COST action  
536 CA16118 that facilitated this collaboration.

## 537 Disclosure:

538 KGM, AB, RT and KR are employees of GeneDx, Inc. KR holds stock in OPKO Health, Inc. KKK, PB and  
539 ABA are employees of CENTOGENE AG.

540

541

## 542 Online Methods:

### 543 Patient recruitment

544 All affected probands were investigated by their referring physicians and all genetic analysis was  
545 performed in a diagnostic setting. Legal guardians of affected probands gave informed consent for  
546 genomic investigations and publication of their anonymized data.

### 547 Next generation sequencing of index patients

#### 548 *Individual 1:*

549 Genomic DNA was isolated from peripheral blood leukocytes of proband and both parents and  
550 exome-coding DNA was captured with the Agilent Sure Select Clinical Research Exome (CRE) kit (v2).  
551 Sequencing was performed on an Illumina HiSeq 4000 with 150bp paired end reads. Reads were  
552 aligned to hg19 using BWA (BWA-MEM v0.7.13) and variants were called using the GATK haplotype  
553 caller (v3.7 (reference: <http://www.broadinstitute.org/gatk/>)<sup>98</sup>. Detected variants were annotated,  
554 filtered and prioritized using the Bench lab NGS v5.0.2 platform (Agilent technologies). Initially, only  
555 genes known to be involved in epilepsy were analyzed, followed by a full exome analysis revealing  
556 the homozygous UGP2 variant

#### 557 *Individuals 2, 3 and 4:*

558 Using genomic DNA from the proband and parents (individual 4) or the proband, parents, and  
559 affected sibling (individual 2 and 3), the exonic regions and flanking splice junctions of the genome  
560 were captured using the SureSelect Human All Exon V4 (50 Mb) (individual 4) or the IDT xGen Exome  
561 Research Panel v1.0 (individual 2 and 3). Massively parallel (NextGen) sequencing was done on an  
562 Illumina system with 100bp or greater paired-end reads. Reads were aligned to human genome build  
563 GRCh37/UCSC hg19, and analyzed for sequence variants using a custom-developed analysis tool.  
564 Additional sequencing technology and variant interpretation protocol has been previously  
565 described<sup>99</sup>. The general assertion criteria for variant classification are publicly available on the  
566 GeneDx ClinVar submission page (<http://www.ncbi.nlm.nih.gov/clinvar/submitters/26957/>)

#### 567 *Individual 5 (Nijmegen)*

568 Diagnostic exome sequencing was done at the Departments of Human Genetics of the Radboud  
569 University Medical Center Nijmegen, The Netherlands and performed essentially as described  
570 previously<sup>100</sup>.

#### 571 *Individual 6, 7, 8, 9 and 10*

572 After informed consent, we collected blood samples from the probands, their parents and unaffected  
573 siblings, and extracted DNA using standard procedures. To investigate the genetic cause of the  
574 disease, WES was performed in the affected proband. Nextera Rapid Capture Enrichment kit  
575 (Illumina) was used according to the manufacturer instructions. Libraries were sequenced in an  
576 Illumina HiSeq3000 using a 100-bp paired-end reads protocol. Sequence alignment to the human  
577 reference genome (UCSC hg19), and variants calling, and annotation were performed as described  
578 elsewhere<sup>101</sup>. After removing all synonymous changes, we filtered single nucleotide variants (SNVs)

579 and indels, only considering exonic and donor/acceptor splicing variants. In accordance with the  
580 pedigree and phenotype, priority was given to rare variants [ $<1\%$  in public databases, including 1000  
581 Genomes project, NHLBI Exome Variant Server, Complete Genomics 69, and Exome Aggregation  
582 Consortium (ExAC v0.2)] that were fitting a recessive or a de novo model.

### 583 *Individual 11 and 12*

584 Whole exome sequencing was performed at CENTOGENE AG, as previously described<sup>102</sup>.

585

### 586 Human brain samples

587 Tissue was obtained, upon informed consent, and used in a manner compliant with the Declaration  
588 of Helsinki and the Research Code provided by the local ethical committees. Fetal brains were  
589 preserved after spontaneous or induced abortions with appropriate maternal written consent for  
590 brain autopsy and use of rest material for research. We performed a careful histological and  
591 immunohistochemical analysis and evaluation of clinical data (including genetic data, when  
592 available). We only included specimens displaying a normal cortical structure for the corresponding  
593 age and without any significant brain pathology.

### 594 Brain tissue immunohistochemistry

595 For immunohistochemical analysis, we used 2 cases from the first trimester (GW6 and GW9), 4 cases  
596 from the second trimester (GW21, GW23, GW24 and GW26) and 2 cases from the third trimester  
597 (GW33 and GW36). Anatomical regions were determined according to the atlas of human brain  
598 development<sup>103-106</sup>. We cut 4  $\mu\text{m}$  sections from formalin-fixed, paraffin embedded whole fetuses  
599 (GW6 and GW9) and brain tissue from cerebral, mesencephalic, cerebellar and brain stem region  
600 (from GW21 to GW36). Slides were stained with mouse anti-UGP2 (C-6) in a 1:150 dilution (Santa  
601 Cruz) and visualized using Mouse and Rabbit Specific HRP/DAB (ABC) Detection IHC kit (Abcam).  
602 Mayer's hematoxylin was used as a counterstain for immunohistochemistry followed by mounting  
603 and coverslipping (Bio-Optica) for slides. Prepared slides were analyzed and scanned under a  
604 VisionTek® Live Digital Microscope (Sakura).

605

### 606 Cloning of UGP2 cDNA

607 RNA was isolated using TRI reagent (Sigma) from whole peripheral blood of index patient 1 and her  
608 parents, after red blood cell depletion with RBC lysis buffer (168mM  $\text{NH}_4\text{Cl}$ , 10mM  $\text{KHCO}_3$ , 0.1mM  
609 EDTA). cDNA was synthesized following the iSCRIPT cDNA Synthesis Kit (Bio-Rad) protocol, and the  
610 coding sequence of the long and short UGP2 isoform (wild type or mutant) was PCR-amplified  
611 together with homology arms for Gibson assembly (see **Supplementary Table 8** for primer  
612 sequences) using Phusion High-Fidelity DNA polymerase (NEB). PCR amplified DNA was then cloned  
613 by Gibson assembly as previously described<sup>107</sup> in a pPyCAG-IRES-puro plasmid (a kind gift of Ian  
614 Chambers, Edinburgh) opened with EcoRI for experiments in mammalian cells. All obtained plasmids  
615 were sequenced verified by Sanger sequencing (complete plasmid sequences available upon  
616 request).

## 617 Fibroblast cell culture

618 Fibroblasts from index patient 1 and her parents were obtained using a punch biopsy according to  
619 standard procedures, upon informed consent (IRB approval MEC-2017-341). Fibroblasts from the  
620 parents of index patient 2 and 3 were also obtained upon informed consent at McMaster Children's  
621 Hospital. All fibroblasts were cultured in standard DMEM medium supplemented with 15% Fetal calf  
622 serum, MEM Non-Essential amino acids (Sigma), 100 U/ml penicillin and 100 µg/ml streptomycin, as  
623 done previously<sup>108</sup>, in routine humidified cell culture incubators at 20% O<sub>2</sub>. Fibroblast cell lines were  
624 transfected using Lipofectamine 3000 (Invitrogen) with the indicated plasmid constructs. All the cell  
625 lines used in this report were regularly checked for the presence of mycoplasma and were negative  
626 during all experiments.

## 627 Genome engineering in human embryonic stem cells

628 H9 human embryonic stem cells were cultured as previously described<sup>107,109</sup>. In short, cells were  
629 maintained on feeder free conditions in mTeSR-1 medium (STEMCELL technologies) on Matrigel  
630 (Corning) coated culture dishes. To engineer the patient specific UGP2 mutation by homologous  
631 recombination<sup>110</sup>, ESC were transfected using Lipofectamine 3000 with a plasmid expressing  
632 eSpCas9-t2a-GFP (a kind gift of Feng Zhang) and a gRNA targeting the *UGP2* gene (see  
633 **Supplementary Table 8** for the sequence), together with a 60 bp single stranded oligonucleotide  
634 (ssODN) homology template encoding the patient mutation (synthesized at IDT). To increase the  
635 stability of the ssODN and therefore homologous recombination efficiency, the first two 5' and 3'  
636 nucleotides were synthesized using phosphorothiorate bonds<sup>111</sup>. 48 hours post transfection, GFP  
637 expressing cells were sorted, and 6000 single GFP-positive cells were plated on a Matrigel coated 6-  
638 well plate in the presence of 10µM ROCK-inhibitor (Y27632, Millipore). After approximately 10 days,  
639 single colonies were manually picked, expanded and genotyped using Sanger sequencing (see  
640 **Supplementary Table 8** for primer sequences). As a by-product of non-homologous end joining,  
641 knock-out clones were identified which showed a single nucleotide A insertion at position 42 of *UGP2*  
642 transcript 1 (chr2:64083462\_64083463insA), leading to an out of frame transcript and a premature  
643 termination of the protein at amino acid position 47 (D15Rfs\*33). Western blotting confirmed the  
644 absence of all UGP2 protein in knock-out clones and the loss of the short UGP2 isoform in clones with  
645 the patient mutation. To produce a stable rescue cell line, ESC cells were transfected as previously  
646 described with the pPyCAG-IRES-puro plasmid expressing either the long WT or mutant UGP2  
647 isoform. After 48 hours, the population of cells with the transgene integration was selected with  
648 1µg/ml puromycin. Engineered ESC clones had a normal colony morphology and pluripotency factor  
649 expression.

## 650 Patient specific Induced pluripotent stem cell generation

651 Patient fibroblast cell lines were reprogrammed using the CytoTune™-iPS 2.0 Sendai Reprogramming  
652 Kit (Thermo Scientific, A16517) expressing the reprogramming factors OCT4, SOX2, KLF4 and C-MYC  
653 on matrigel coated cell culture plates, upon informed consent (IRB approval MEC-2017-341). After  
654 approximately 4-5 weeks, emerging colonies were manually picked and expanded. Multiple clones  
655 were assessed for their karyotype, pluripotency factor expression and three lineage differentiation  
656 potential (Stem Cell Technologies, #05230), following the routine procedures of the Erasmus MC iPS



657 Cell facility, as previously described<sup>108</sup>. Sanger sequencing was used to verify the genotype of each  
658 obtained iPSC line. We used three validated clones for each individual in our experiments.

#### 659 Neural stem cell differentiation

660 Pluripotent cells were differentiated in neural stem cells (NSCs), using a modified dual SMAD  
661 inhibition protocol<sup>112</sup>. In short, 18000 cells/cm<sup>2</sup> were plated on matrigel coated cell culture dishes in  
662 mTeSR-1 medium in the presence of 10 $\mu$ M Y27632. When cells reached 90% confluency, the medium  
663 was switched to differentiation medium (KnockOut DMEM (Gibco), 15% KnockOut serum  
664 replacement (Gibco), 2mM L-glutamine (Gibco), MEM Non-Essential amino acids (Sigma), 0.1 mM  $\beta$ -  
665 mercaptoethanol, 100U/ml penicillin and 100  $\mu$ g/ml streptomycin) supplemented with 2 $\mu$ M A 83-01  
666 (Tocris) and 2 $\mu$ M Dorsomorphin (Sigma-Aldrich). At day 6, medium was changed to an equal ratio of  
667 differentiation medium and NSC medium (KnockOut DMEM-F12 (Gibco), 2mM L-glutamine (Gibco),  
668 20ng/ml bFGF (Peprotech), 20ng/ml EGF (Peprotech), 2% StemPro Neural supplement (Gibco),  
669 100U/ml penicillin and 100 $\mu$ g/ml streptomycin) supplemented with 2 $\mu$ M A 83-01 (Tocris) and 2 $\mu$ M  
670 Dorsomorphin (Sigma-Aldrich). At day 10, cells were passaged (NSC p=0) using Accutase (Sigma) and  
671 maintained in NSC medium. We used commercially available H9-derived NSCs (Gibco) as a control (a  
672 kind gift of Raymond Poot, Rotterdam).

#### 673 Other stem cell differentiation experiments

674 ESCs were differentiated into hematopoietic stem cells and cardiomyocyte using commercially  
675 available STEMCELL technologies kits (STEMdiff Hematopoietic kit #05310, STEMdiff Cardiomyocyte  
676 differentiation kit #05010) according to manufacturer's instructions. Cells were finally harvested and  
677 lysed with TRI reagent to isolate RNA for further RT-qPCR analysis.

#### 678 RNA-sequencing and data analysis

679 For RNA-seq on blood derived patient RNA, peripheral blood was obtained from index patient 1 and  
680 her parents, collected in PAX tubes and RNA was isolated following standard diagnostic procedures in  
681 the diagnostics unit of the Erasmus MC Clinical Genetics department. RNA-seq occurred in a  
682 diagnostic setting, and sequencing was performed at GenomeScan (Leiden, The Netherlands). For  
683 RNA-seq of *in vitro* cultured cell lines, RNA was obtained from 6-well cultures using TRI reagent, and  
684 further purified using column purification (Qiagen, #74204). mRNA capture, library prep including  
685 barcoding and sequencing on an Illumina HiSeq2500 machine were performed according to standard  
686 procedures of the Erasmus MC Biomics facility. Approximately 20 million reads were obtained per  
687 sample. For the cell line experiments, two independent H9 wild type cultures, two independent  
688 knock-out clones harboring the same homozygous *UGP2* genetic alteration and two independent  
689 clones harboring the patient homozygous *UGP2* mutation were used. Each cell line was sequenced in  
690 two technical replicates at ESC state and differentiated NSC state (at passage 5). FASTQ files obtained  
691 after de-multiplexing of single-end, 50 bp sequencing reads were trimmed by removing possible  
692 adapters using Cutadapt after quality control checks on raw data using the FastQC tool. Trimmed  
693 reads were aligned to the human genome (hg38) using the HISAT2 aligner<sup>113</sup>. To produce Genome  
694 Browser Tracks, aligned reads were converted to bedgraph using bedtools genomecov, after which  
695 the bedGraphToBigWig tool from the UCSC Genome Browser was used to create a bigwig file.  
696 Aligned reads were counted for each gene using htseq-count<sup>114</sup> and GenomicFeatures<sup>115</sup> was used to  
697 determine the gene length by merging all non-overlapping exons per gene from the

698 Homo\_sapiens.GRCh38.92.gtf file (Ensembl). Differential gene expression and RPKM (Reads Per  
699 Kilobase per Million) values were calculated using edgeR<sup>116</sup> after removing low expressed genes and  
700 normalizing data. The threshold for significant differences in the gene expression was FDR < 0.05. To  
701 obtain a list of ESC and NSC reference genes used in Supplementary Figure 6F, we retrieved genes  
702 annotated in the following GO terms using GSEA/MSigDB web site v7.0:  
703 GO\_FOREBRAIN\_NEURON\_DEVELOPMENT (GO:0021884), GO\_CEREBRAL\_CORTEX\_DEVELOPMENT  
704 (GO:0021987), GO\_NEURAL\_TUBE\_DEVELOPMENT (GO:0021915),  
705 BHATTACHARYA\_EMBRYONIC\_STEM\_CELL (PMID: 15070671) and BENPORATH\_NOS\_TARGETS  
706 (PMID: 18443585).

#### 707 Functional enrichment analysis

708 Metascape<sup>117</sup>, g:profiler<sup>118</sup> and Enrichr<sup>119</sup> were used to assess functional enrichment of differential  
709 expressed genes. **Supplementary Table 4** reports all outputs in LogP, log(q-value) and Adjusted p-  
710 value (q-value) for Metascape and g:profiler, and in p-value, Adjusted p-value (q-value) and  
711 combined-score (which is the estimation of significance based on the combination of Fisher's exact  
712 test p-value and z-score deviation from the expected rank) for Enrichr. All tools were used with  
713 default parameters and whole genome set as background.

#### 714 Genome-wide homology search:

715 To make a genome-wide list of transcripts sharing a similar structure as UGP2 transcripts, 42976  
716 transcripts from 21522 genes (Human genes GRCh38.p12) were extracted using BioMart of Ensembl  
717 (biomaRt R package). 11056 out of 21522 genes had only 1 transcript and the remaining 31920  
718 transcripts from 10466 genes were selected, the protein sequences were obtained with biomaRt R  
719 package and homology analysis was performed using the NCBI's blastp (formatting option: -  
720 outfmt=6) command line. We grouped longest and shorter transcript based on coding sequence  
721 length and only kept those that matched a pairwise homology comparison between the longest and  
722 the shorter transcript with the following criteria: complete 100 percent identity, without any gap and  
723 mismatch, and starting ATG codon of shortest transcript being part of the longest transcript(s). 1766  
724 genes meet these criteria. We then filtered these genes for published essential genes<sup>6</sup>, leaving us  
725 with 1197 genes. Using BioMart (Attributes: Phenotype description and Study external reference) of  
726 Ensembl we then evaluated the probability that these genes were implicated in disease and  
727 identified 850 genes that did not have an association with disease phenotype/OMIM number. Of  
728 those, 247 genes encoded proteins of which the shorter isoform differed less than 50 amino acids  
729 from the longer isoform. We chose this arbitrary threshold to exclude those genes where both  
730 isoforms could encode proteins differing largely in size and might therefore encode functionally  
731 completely differing proteins (although we cannot exclude that this will also hold true for some of  
732 the genes in our selection).

#### 733 Differential isoform expression in fetal tissues

734 Publically available RNA-seq data from various fetal tissue samples (**Supplementary Table 2**) were  
735 analyzed using the same workflow as described for the RNA-seq data analysis above. To determine  
736 differential isoform expression in these tissues, we calculated a ratio between the unique exon(s) of  
737 the shortest and longest transcript for each gene and assessed its variability across different fetal  
738 tissue samples. The number of reads for each unique exon of a transcript was calculated by mapping

739 aligned RNA-seq reads against the unique exon coordinate using bedtools multicov. The longest and  
740 shortest transcripts were separated and the transcript ratio (number of counts of shortest transcript  
741 / (number of counts of shortest transcript + number of counts of longest transcript)) for each gene  
742 was obtained from the average reads of RNA-seq samples per tissue. 382 genes out of 1197 genes  
743 showed high variability across different samples (defined as a difference between highest and lowest  
744 ratio > 0.5), 277 of those high variable genes were not associated with a disease phenotype/OMIM  
745 number and of these 83 genes had a length less than 50 amino acids (a subset of the 247 genes with  
746 no OMIM and length less than 50 amino acids)

#### 747 Haplotype Analysis

748 The 30 MB region surrounding *UGP2* was extracted from exome sequencing VCF files to include both  
749 common and rare polymorphisms. Variants were filtered for a minimum depth of coverage of at least  
750 10 reads and a genotype quality of at least 50. The filtered variants, were then used as input in PLINK  
751 (v1.07) with the following settings:

752 --homozyg-snp 5

753 --homozyg-kb 100

754 --homozyg-gap 10000

755 --homozyg-window-het 0

756 ROH around the *UGP2* variant were identified in all 5 probands examined. The minimum ROH in  
757 common between all samples was a 5Mb region at chr2: 60679942-65667235. We note that targeted  
758 sequencing leads to uneven SNP density, so the shared ROH may, in fact, be larger or smaller. Next,  
759 we used recombination maps from deCODE to estimate the size of the region in centiMorgans (cM).  
760 We then used the region size in cM to estimate the time to event in generations using methods  
761 previously described<sup>120</sup>.

762

#### 763 qPCR analysis

764 RNA was obtained using TRI reagent, and cDNA prepared using iSCRIPT cDNA Synthesis Kit according  
765 to manufacturer's instructions. qPCR was performed using iTaq universal SYBR Green Supermix in a  
766 CFX96RTS thermal cycler (Bio-Rad). **Supplementary Table 8** summarizes all primers used in this  
767 study. Relative gene expression was determined following the  $\Delta\Delta$ ct method. To calculate the ratio of  
768 the short isoform, we performed absolute quantification as previously described<sup>121</sup>. Briefly, we  
769 performed qPCR on known copy numbers, ranging from  $10^3$  to  $10^8$  copies, of a plasmid containing  
770 the short *UGP2* isoform (5' UTR included) using primers detecting specifically either the total or the  
771 short isoform. After plotting the log copy number versus the ct, we obtained a standard curve that  
772 we used to extrapolate the copy number of the unknown samples. To test for significance, we used  
773 Student's T-test and considered  $p < 0.05$  as significant.

#### 774 Western blotting

775 Proteins were extracted with NE buffer (20mM Hepes pH 7.6, 1.5mM MgCl<sub>2</sub>, 350mM KCl, 0.2mM  
776 EDTA and 20% glycerol) supplemented with 0.5% NP40, 0.5mM DTT, cOmplete Protease Inhibitor  
777 Cocktail (Roche) and 150U/ml benzonase Protein concentration was determined by BCA (Pierce) and

778 20-50µg of proteins were loaded onto a 4–15% Criterion TGX gel (Bio-Rad). Proteins were then  
779 transferred to a nitrocellulose membrane using the Trans-Blot Turbo Transfer System (Bio-Rad). The  
780 membrane was blocked in 5% milk in PBST and subsequently incubated overnight at 4°C with primary  
781 antibody diluted in milk. After PBST washes, the membrane was incubated 1 hour at RT with the  
782 secondary antibody and imaged with an Odyssey CLX scanning system (Li-Cor). Band intensities were  
783 quantified using Image Studio (Li-cor). Antibodies used were: Ms-α-UGP2 (sc-514174) 1:250; Ms-α-  
784 Vinculin (sc-59803) 1:10000; Gt-α-actin (sc-1616) 1:500; Ms-α-LAMP2 (H4B4) 1:200; IRDye 800CW  
785 Goat anti-Mouse (926-32210) 1:5000; IRDye 680 Donkey anti-Goat (926-32224) 1:5000.

786

## 787 Zebrafish disease modelling

788 Animal experiments were approved by the Animal Experimentation Committee at Erasmus MC,  
789 Rotterdam. Zebrafish embryos and larvae were kept at 28°C on a 14–10-hour light–dark cycle in 1 M  
790 HEPES buffered (pH 7.2) E3 medium (34.8 g NaCl, 1.6 g KCl, 5.8 g CaCl<sub>2</sub> · 2H<sub>2</sub>O, 9.78 g MgCl<sub>2</sub> · 6 H<sub>2</sub>O).  
791 For live imaging, the medium was changed at 1 dpf to E3 + 0.003% 1-phenyl 2-thiourea (PTU) to  
792 prevent pigmentation. *Ugp2a* and *ugp2b* were targeted by Cas9/gRNA RNP-complex as we did  
793 before<sup>76</sup>. Briefly, fertilized oocytes from a tgBAC(*slc1a2b*:Citrine)*re01tg* reporter line<sup>76</sup> maintained on  
794 an TL background strain were obtained, and injected with Cas9 protein and crRNA and tracrRNA  
795 synthesized by IDT (Alt-R CRISPR-Cas9 System), targeting the open reading frame of zebrafish *ugp2a*  
796 and *ugp2b*. DNA was extracted from fin clips and used for genotyping using primers flanking the  
797 gRNA location (**Supplementary Table 8**) followed by sequencing. Mutants with a high level of out of  
798 frame indels in both genes were identified using TIDE<sup>122</sup> and intercrossed to obtain germ line  
799 transmission. Upon re-genotyping, mutant zebrafish with the following mutations as indicated in  
800 **Figure 6** were selected and further intercrossed. In this study, we describe two new mutant fish lines  
801 containing deletions in *ugp2a* (*ugp2a*<sup>Δ/Δ</sup>) and *ugp2b* (*ugp2b*<sup>Δ/Δ</sup>): *ugp2a*<sup>re08/re08</sup> containing a 37 bp  
802 deletion in exon 2 and *ugp2b*<sup>re09/re09</sup> containing a 5 bp deletion in exon 2. Intravital imaging, and  
803 analysis of eye movement, was performed as previously described<sup>76</sup>. Briefly, zebrafish larvae  
804 anesthetized in tricaine were mounted in low melting point agarose containing tricaine and imaged  
805 using a Leica SP5 intravital imaging setup with a 20×/1.0 NA water-dipping lens. To assess the  
806 locomotor activity of zebrafish larvae from 3 to 5 dpf, locomotor activity assays were performed  
807 using an infrared camera system (DanioVision™ Observation chamber, Noldus) and using EthoVision®  
808 XT software (Noldus) as described<sup>76</sup>. Briefly, control (*n* = 24) and *ugp2a*<sup>Δ/Δ</sup>; *ugp2b*<sup>Δ/Δ</sup> (*n* = 24) zebrafish  
809 larvae, in 48 well plates, were subjected to gradually increasing (to bright light) and decreasing light  
810 conditions (darkness) as in Kuil et al<sup>76</sup>. Distance traveled (mm) per second was measured. For 4-AP  
811 (Sigma) stimulation animals were treated with 4-AP dissolved in DMSO 30 minutes before the onset  
812 of the experiments. For these experiments locomotor activity was measured over 35 minutes, with  
813 the first 5 minutes going from dark to light, followed by 30 minutes under constant light exposure.

814

## 815 Periodic acid- schiff (PAS) staining

816 ESCs or differentiated NSCs (wild type, KO, KI or rescue) were incubated under hypoxia conditions  
817 (3% O<sub>2</sub>) for 48 hours. Cells were fixed with 5.2% formaldehyde in ethanol, incubated 10 min with 1%  
818 Periodic acid, 15 min at 37°C with Schiff's reagent (Merck) and 5 min with Hematoxylin solution

819 (Klinipath) prior to air drying and mounting. Every step of the protocol is followed by a 10 minutes  
820 wash with tap water. Imaging occurred on an Olympus BX40 microscope. Images were acquired at a  
821 100x magnification, and ImageJ software was used for quantification. For ESCs, we used a minimum  
822 of 20 images per genotype for the quantification, containing on average 20 cells each, calculating the  
823 percentage of PAS positive area. For NSCs, we imaged between 80 to 100 cells per genotype,  
824 counting the number of glycogen granules in the cytoplasm. We report the average of two  
825 independent experiments at 48 hours low oxygen.

826

#### 827 UGP2 enzymatic activity

828 The measurement of UGP2 enzyme activity was performed according to a modified GALT  
829 enzyme activity assay as described previously<sup>123</sup>. Frozen cell pellets were defrosted and  
830 homogenized on ice. 10 µl of each cell homogenate (around 0.5 mg protein/ml as  
831 established by BSA protein concentration determination) was pre-incubated with 10 µl of  
832 dithiothreitol (DDT) for 5 min at 25°C. 80 µl of a mixture of glucose-1-phosphate (final  
833 concentration 1 mM), UTP (0.2 mM), magnesium chloride (1 mM), glycine (125 mM) and  
834 Tris-HCl (pH8) (40 mM) was added and incubated for another 15 min at 25°C. The reaction  
835 was stopped by adding 150 µl of 3.3% perchloric acid. After 10 min on ice the mixture was  
836 centrifuged (10,000 rpm for 5 min at 4°C), the supernatant isolated and neutralized with ice  
837 cold 8 µl potassium carbonate for 10 min on ice. After centrifugation the supernatant was  
838 isolated and 1:1 diluted with eluent B (see below) after which the mixture was added to a  
839 Millipore Amicon centrifugal filter unit. After centrifugation the supernatant was stored at -  
840 20°C until use. The separation was performed by injection of 10 µl of the defrosted  
841 supernatant onto a HPLC system with UV/VIS detector (wave length 262 nm) equipped with  
842 a reversed phase Supelcosil LC-18-S 150 mm x 4.6 mm, particle size 5 µm, analytical column  
843 and Supelguard LC18S guard column (Sigma-Aldrich). During the experiments the  
844 temperature of the column was maintained at 25°C. The mobile phase consisted of eluent A  
845 (100% methanol) and eluent B (50 mM ammonium phosphate buffer pH7.0 and 4 mM  
846 tetrabutylammonium bisulphate). A gradient of 99% eluent B (0-20 min), 75% eluent B (20-  
847 30 min) and 99% eluent B (30-45 min) at a flow rate of 0.5 ml/min was used. The reaction  
848 product UDP-glucose was quantified using a calibration curve with known concentrations of  
849 UDP-glucose. UGP2 activity was expressed as the amount of UDP-glucose formed per mg  
850 protein per min. Experiments were performed in duplicate and for every cell line two  
851 independently grown cell pellets were used.

#### 852 Immunostaining / Immunohistochemistry

853 For immunofluorescence staining, cells were seeded on coverslips coated with 100µg/ml poly-D-  
854 lysine (Sigma) overnight. For ESC, coverslips were further coated with Matrigel (Corning) for one hour  
855 at 37°C. When cells reached about 70% confluency, they were fixed with 4% PFA for 15 min at RT.  
856 Cells were then permeabilized with 0.5% triton in PBS, incubated one hour in blocking solution (3%  
857 BSA in PBS) and then overnight at 4°C with the primary antibody diluted in blocking solution. The

858 following day the coverslips were incubated one hour at room temperature in the dark with a Cy3-  
859 conjugated secondary antibody and mounted using ProLong Gold antifade reagent with DAPI  
860 (Invitrogen) to counterstain the nuclei. Images were acquired with a ZEISS Axio Imager M2 using a  
861 63X objective.

862 Data availability:

863 RNA-Seq of *in vitro* studies are publicly available through the National Center for Biotechnology  
864 Information (NCBI) Gene Expression Omnibus (GEO) under accession number GSE137129. A token for  
865 reviewer access is present in the supplement. Due to privacy regulations and consent, raw RNA-seq  
866 data from patient blood cannot be made available. To retrieve tissue wide expression levels of *UGP2*,  
867 the GTEx Portal was accessed on 16/07/2019 (<https://gtexportal.org/home/>). RNA-seq data from  
868 various tissues were downloaded from various publications<sup>48-51</sup>. All publically available data that were  
869 re-analyzed here are summarized in **Supplementary Table 2**.

870

871

872

873

874

875

876

877

878

879

880

881

882

883

884

885

886

887

888

## 889 Figure Legends

### 890 **Figure 1:** UGP2 homozygous variants in 10 individuals with severe epileptic encephalopathy

- 891 A) Facial pictures of individual 1 (at 3, 18 and 23 month), individual 5 (at 9 years), individual 6 (at 11  
892 month) and individual 10 (at 2 years). Note the progressive microcephaly with sloping forehead,  
893 suture ridging, bitemporal narrowing, high hairline, arched eyebrows, pronounced philtrum, a  
894 relatively small mouth and large ears.
- 895 B) Electroencephalogram of individual 1 at the age of 8 month showing a highly disorganized  
896 pattern with high voltage irregular slow waves intermixed with multifocal spikes and polyspikes.
- 897 C) T1-weighted mid sagittal brain MRI of individual 1 (age 17 month) and individual 4 (age 24  
898 month) illustrating global atrophy and microcephaly but no major structural anomalies.
- 899 D) Sanger sequencing traces of family 1, confirming the chr2:64083454A>G variant in *UGP2* in a  
900 heterozygous and homozygous state in parents and affected individual 1, respectively.
- 901 E) Family pedigrees of ascertained patients. Affected individuals and heterozygous parents are  
902 indicated in black and half black, respectively. Affected individuals with confirmed genotype are  
903 indicated with an arrow, and numbers. Other affected siblings presenting with similar  
904 phenotypes are indicated with a question mark. Consanguineous parents are indicated with a  
905 double connection line. Male are squares, females circles; unknown sex indicated with rotated  
906 squares; deceased individuals are marked with a line.
- 907 F) Violin plots showing distribution of gene expression (in TPM) amongst male and female samples  
908 from the GTEx portal<sup>43</sup> for various brain regions. Outliers are indicated by dots
- 909 G) Multiple species sequence alignment from the UCSC browser, showing that the ATG start site is  
910 highly conserved.

911

### 912 **Figure 2:** UGP2 homozygous variant leads to a loss of the shorter protein isoform in patient 913 fibroblasts

- 914 A) Schematic drawing of the human *UGP2* locus, with both long and short transcript isoforms.  
915 Boxes represent exons, with coding sequences indicated in green. The location of the  
916 recurrent mutation is indicated in both transcripts.
- 917 B) Western blotting of cellular extracts derived from control fibroblasts or fibroblasts obtained  
918 from family 1, detecting the housekeeping control vinculin or UGP2. Note the two separated  
919 isoforms of UGP2 that have a similar intensity in wild type cells. The shorter isoform is less  
920 expressed in fibroblasts from heterozygous parents and absent in fibroblasts from the  
921 affected proband.
- 922 C) Western blot quantification of the fraction of the short UGP2 protein isoform compared to  
923 total UGP2 expression in control, parental heterozygous and proband homozygous  
924 fibroblasts, as determined in three independent experiments. Error bars represent SEM.
- 925 D) Western blot quantification of total UGP2 protein levels, as determined by the relative  
926 expression to the housekeeping control vinculin. Bar plot showing the results from three  
927 independent experiments. Error bars represent SEM; no significant differences were found  
928 between parents and proband, t-test, two-tailed.

- 929 E) Cell proliferation experiment of fibroblast from heterozygous parents and homozygous  
930 proband from family 1, during a 5 days period, determined in three independent  
931 experiments. Error bars represent SEM.
- 932 F) Immunocytochemistry on cultured control and UGP2 heterozygous and homozygous mutant  
933 fibroblast derived from family 1, detecting UGP2 (red). Nuclei are stained with DAPI. Scale  
934 bar = 50  $\mu$ m.
- 935 G) Enzymatic activity of UGP2 as measured in control and UGP2 heterozygous and homozygous  
936 mutant fibroblast derived from family 1. Shown is the mean of two independent  
937 experiments. Error bars represent SEM; no significant differences were found, unpaired t-  
938 test, two-tailed.

939 **Figure 3:** UGP2 short isoform is predominant in brain related cell types

- 940 A) Western blotting showing UGP2 expression in H9 human embryonic stem cells (ESCs), H9  
941 derived neural stem cells (NSCs) and fibroblasts (Fibro). Vinculin is used as a housekeeping  
942 control. Note the changes in relative expression between the two UGP2 isoforms in the  
943 different cell types. L, ladder.
- 944 B) Western blot quantification of the fraction of the short UGP2 protein isoform compared to  
945 total UGP2 expression, as determined in three independent experiments. Error bars  
946 represent SEM.
- 947 C) Multiplex RT-PCR of ESCs, NSCs and fibroblasts, showing a similar variability in isoform  
948 expression at the transcript as at the protein level. Each cell line was tested in triplicates.
- 949 D) Quantification of the fraction of the short *UGP2* transcript isoform compared to total *UGP2*  
950 expression, from the multiplex RT-PCR from C). Error bars represent SEM
- 951 E) Quantification of the fraction of the short *UGP2* transcript isoform compared to total *UGP2*  
952 expression by qRT-PCR in three independent experiments. Error bars represent SEM.
- 953 F) Ratio of RNA-seq reads covering the short transcript isoform compared to the total reads  
954 (covering both short and long isoforms), in multiple fetal tissues. In RNA-seq samples derived  
955 from brain, virtually all UGP2 expression comes from the short isoform. Error bars represent  
956 SD.
- 957 G) Immunohistochemistry detecting UGP2 in human fetal brains from the first, second and third  
958 trimester (gestational week (GW) 6, 9, 23 and 36). See text for details.
- 959 H) Western blotting detecting UGP2 in various human brain regions at week 14, 20 and 28 of  
960 gestation, showing the virtual absence of the long isoform expression in fetal brain. Vinculin  
961 is used as a housekeeping control. L, ladder.

962

963 **Figure 4:** RNA-seq of UGP2 mutant H9 derived cell lines

- 964 A) Venn diagram showing the overlap between differentially expressed genes in UGP2 KO or KI  
965 NSCs that are upregulated (upper panel genes with FDR<0.05 and LogFC>1) or  
966 downregulated (lower panel, genes with FDR<0.05 and LogFC<-1) compared to wild type  
967 NSCs.
- 968 B) Box plot showing the distribution of gene expression levels (in Log<sub>2</sub>(RPKM+1)) from RNA-seq  
969 for the groups of genes displayed in A), in wild type, UGP2 KI or KO NSCs. Boxes are IQR; line



970 is median; and whiskers extend to 1.5x the IQR (\*=p<0.05; \*\*=p<0.01, \*\*\*=p<0.001, unpaired  
971 t-test, two-tailed).

972 C) Enrichment analysis using Enrichr<sup>119</sup> of up- or downregulated genes in NSCs from **A)** for  
973 selected gene ontology sets, showing the 5 most enriched terms per set. Combined score  
974 and p-value calculated by Enrichr are depicted (\*=p<0.05; \*\*=p<0.01; \*\*\*=p<0.001).

975 D) qRT-PCR validation of differentially expressed genes from RNA-seq in wild type, UGP2 KI,  
976 UGP2 KO NSCs and KO NSCs that were rescued with either WT or MUT (Met12Val) transcript  
977 isoform 1, at p5 of NSC differentiation. Bar plot showing the mean fold change for the  
978 indicated genes compared to wild type, normalized for the housekeeping gene *TBP*. Results  
979 of two biological and two independent technical replicates are plotted. Colors match the  
980 Venn diagram group to which the tested genes belong to from A). Error bars represent SEM;  
981 (\*=p<0.05; \*\*=p<0.01, \*\*\*=p<0.001, unpaired t-test, one-tailed).

982

983 **Figure 5:** metabolic changes upon UGP2 loss

984 A) UGP2 enzymatic activity in WT, UGP2 KI, KO and KO NSCs rescued with wildtype or mutant  
985 Met12Val isoform 1 of UGP2. Bar plot showing the mean of two replicate experiments, error  
986 bar is SEM. \*=p<0.05; \*\*\*=p<0.001, unpaired t-test, two-tailed.

987 B) Representative pictures of PAS staining in WT, KI, KO and rescue NSCs. Nuclei are  
988 counterstained with hematoxylin (blue). Inserts show zoom-in of part of the cytoplasm. Note  
989 the presence of glycogen granules in WT NSCs, their diminished number in KI NSCs, their  
990 absence in KO NSCs and their reappearance upon rescue with both wild type long UGP2 as  
991 with Met12Val long UGP2.

992 C) Quantification of the number of glycogen granules per cell in WT, UGP2 KI, KO and rescue  
993 NSCs, after 48 hours culture under low-oxygen conditions. Shown is the average number of  
994 glycogen granules per cell, n=80-100 cells per genotype. Error bars represent the SD.  
995 \*\*\*=p<0.001, unpaired t-test, two-tailed.

996 D) Western blotting detecting LAMP2 (upper panel) and the housekeeping control ACTIN (lower  
997 panel) in cellular extracts from ESC-derived NSCs, that are wt, UGP2 KI, KO and KO cells  
998 rescued with either the long wildtype isoform 1 or the mutant Met12Val isoform 1.  
999 Glycosylated LAMP2 runs at ~110 kDa, whereas hypo-glycosylated LAMP2 is detected around  
1000 75 kDa. The absence of detectable changes in LAMP2 glycosylation in KI cells is likely  
1001 explained by a non-complete isoform switch upon in vitro NSC differentiation, resulting in  
1002 residual UGP2 levels (c.p. **Supplementary Figure 5D**).

1003 E) qRT-PCR expression analysis for UPR marker genes (spliced *XBP1*, *HSPA5*, *ATF4* and *EDEM*) in  
1004 WT, KI, KO and rescue NSCs. Shown is the mean fold change for the indicated genes  
1005 compared to wild type, normalized for the housekeeping gene *TBP*. Results of two biological  
1006 and two independent technical replicates are plotted, from two experiments. Error bars  
1007 represent SEM; \*=p<0.05; \*\*=p<0.01, \*\*\*=p<0.001, unpaired t-test, two-tailed

1008

1009

1010

1011 **Figure 6:** zebrafish disease modelling

- 1012 A) Schematic drawing of the *ugp2a* and *ugp2b* loci in zebrafish and the generated mutations  
1013 indicated.
- 1014 B) Confocal images (Maximum projection of confocal Z-stacks) of the brain of wild type (left)  
1015 and *ugp2a*<sup>Δ/Δ</sup>; *ugp2b*<sup>Δ/Δ</sup> mutant zebrafish larvae (right), both in an *slc1a2b*-citrine reporter  
1016 background, at 4 days post fertilization (dpf). The lower panels are higher magnifications of  
1017 the boxed regions indicated in the upper panels. Scale bar in upper panel is 100 μm, in lower  
1018 panel 20 μm. In upper panel, Z = 45 with step size 4 μm; In lower panel, Z = 30 with step size  
1019 2 μm.
- 1020 C) Enzymatic activity in *ugp2* double mutant zebrafish larvae at 4 and 5 dpf, compared to wild  
1021 type age matched controls, showing reduced Ugp2 enzyme activity in double mutant  
1022 zebrafish.
- 1023 D) qRT-PCR for the neuronal activity marker c-FOS in wild type and *ugp2* double mutant larvae  
1024 at 3 dpf. For each group, 2 batches of 12 larvae were pooled. Shown is the mean fold change  
1025 for the indicated genes compared to wild type, normalized for the housekeeping gene *gapdh*.  
1026 Error bars represent SEM; \*\*\*= p<0.001, unpaired *t*-test, two-tailed.
- 1027 E) Representative graph of a locomotion assay showing the total distance moved by larvae  
1028 during the dusk-dawn routine (total time: 3 hr 12 min), n = 24 larvae per genotype. Grey  
1029 shading shows the standard error of the mean.
- 1030 F) Quantification of the total distance moved throughout the experiment from E) excluding the  
1031 dark period.
- 1032 G) Quantification of the number of observed spontaneous eye movements during a 2 minutes  
1033 observation in wild type and *ugp2* double mutant larvae at 4 dpf. Each dot represents one  
1034 larva; shown is the average and SD; \*\*\*p<0.001, *t*-test, two tailed.
- 1035 H) Quantification of the frequency of movements at a speed of > 15 mm/s, for wild type control  
1036 and *ugp2* double mutant zebrafish larvae at 4 dpf, treated with mock control or with 0.04  
1037 nM or 0.4 nM 4-AP during a 35 minutes observation. Each dot represents a single larva;  
1038 results of two experiments are shown, with in total 24 larvae per condition.
- 1039 I) As H, but now assessing movement duration at a speed of > 15 mm/s. \* =p<0.05, two way  
1040 ANOVA with Bonferoni post-test.

1041 **Figure 7:** Essentiality of UGP2 and other disease candidate genes with a similar mutation mechanism

- 1042 A) qRT-PCR analysis of the hematopoietic stem cell markers *GATA2*, *LMO2* and *RUNX1*, after 12  
1043 days of differentiation of wild type, UGP2 KO and UGP2 KO rescue ESCs. Shown is the mean  
1044 fold change for the indicated genes compared to wild type, normalized for the housekeeping  
1045 gene *TBP*. Results of two biological and two technical replicates are plotted. Error bars  
1046 represent SEM; \* =p<0.05; \*\* =p<0.01, \*\*\* =p<0.001, unpaired *t*-test, two-tailed.
- 1047 B) As A), but now for cardiomyocyte differentiation at day 15, assessing expression of the  
1048 cardiomyocyte markers *TNNT2*, *MYL2* and *MYL7*.
- 1049 C) Bright-field image of cardiomyocyte cultures of wild type, UGP2 KO and rescue cells. Note  
1050 the elongated organized monolayer structures cardiomyocytes capable of beating in wild  
1051 type and rescue cells, that are absent in KO cultures. Scale bar is 400 μm.
- 1052 D) Scheme showing the homology search to identify genes with a similar structure as UGP2,  
1053 where ATG altering mutations could affect a tissue specific isoform causing genetic disease.

1054 E) Heat map showing the ratio of short isoform expression over total isoform expression from  
1055 published RNA-seq data amongst 20 tissues for 83 out 247 essential genes that are not yet  
1056 implicated in disease and in which the short and longer protein isoform differ by less than 50  
1057 amino acids at the N-terminal.

1058 **Supplementary Figure 1, related to Figure 1:**

- 1059 A) Growth chart from individual 1 for length (left) and head circumference (right) in cm.  
1060 Reference chart from the Dutch population are used (TNO) and regions between -2 and + 2  
1061 SD are shaded.
- 1062 B) MRI studies of individual 5 (at the age of 12 month) and individual 6, showing global brain  
1063 atrophy.
- 1064 C) ROH comparison between affected individuals from family 1, 4, 5, 6 and 7, carrying the  
1065 homozygous chr2:64083454A>G mutation. The red line indicates the UGP2 variant, and the  
1066 blue lines demark the shared ROH region between the individuals (chr2:60679942-  
1067 65667235).
- 1068 D) Violin plots showing distribution of gene expression (in TPM) amongst samples from the  
1069 GTEx portal<sup>35</sup> for tissues and cell lines. Samples are sorted with the highest median TPM on  
1070 the right. Outliers are indicated by dots.

1071 **Supplementary Figure 2, related to Figure 2:**

- 1072 A) Western blotting of cellular extracts derived from control fibroblasts or fibroblasts obtained  
1073 from heterozygous parents of family 2, detecting the house keeping control vinculin or UGP2.  
1074 Note the two separated isoforms of UGP2 that have a similar intensity in wild type cells. The  
1075 shorter isoform shows reduced expression in fibroblasts from heterozygous parents.
- 1076 B) Quantification of the fraction of the short UGP2 protein isoform compared to total UGP2  
1077 expression in control, and heterozygous fibroblasts from family 2, as determined in three  
1078 independent experiments. Error bars represent SEM.
- 1079 C) Western blot quantification of total UGP2 protein levels, as determined by the relative  
1080 expression to the housekeeping control vinculin. Bar graph showing the results from three  
1081 independent experiments. Error bars represent SEM; no significant differences between  
1082 control and parent samples, unpaired t-test, two-tailed.
- 1083 D) qRT-PCR analysis of total *UGP2* or the short isoform in fibroblast from heterozygous parents  
1084 or homozygous proband from family 1, normalized for the housekeeping control *TBP*. The  
1085 mean fold change compared to heterozygous parents of two biological replicates and two  
1086 technical replicates is shown; error bars represent SEM no significant differences between  
1087 control and parent samples, unpaired t-test, two-tailed.
- 1088 E) Multiplex RT-PCR detecting relative expression of *UGP2* isoform 1 and isoform 2 in peripheral  
1089 blood from family 1 and unrelated wild type controls.
- 1090 F) Sanger sequencing of RT-PCR products from E), showing the expression of the homozygous  
1091 and heterozygous chr2:64083454A>G *UGP2* variant in the index proband, her parents and an  
1092 unrelated control.
- 1093 G) Heat map showing genome-wide gene expression levels (in log<sub>2</sub>(RPKM+1)) in peripheral  
1094 blood from heterozygous parents and homozygous proband from family 1.

- 1095 H) Gene expression levels (in  $\log_2(\text{RPKM}+1)$ ) from RNA-seq in peripheral blood for a selected  
1096 number of genes involved in metabolism.  
1097 I) Cell proliferation experiment of fibroblast from heterozygous parents from family 2 and wild  
1098 type controls, during a 5 days period. Error bars represent SEM, \*\*=  $p < 0.01$ , unpaired t-test,  
1099 two-tailed.  
1100 J) Western blotting detecting UGP2 in human frontal cortex from week 21 and 23 of gestation,  
1101 showing the virtual absence of the long isoform expression in fetal brain. Vinculin is used as a  
1102 housekeeping control.  
1103

1104 **Supplementary Figure 3, related to Figure 4: generation of mutant *UGP2* H9 cell lines**

- 1105 A) Nucleotide sequence encompassing the ATG of *UGP2* transcript isoform 2. Indicated are the  
1106 coding sequence, the location of the gRNA, PAM sequence and ssODN used to introduce the  
1107 C.1A>G, p.? mutation.  
1108 B) Sanger sequencing traces of part of the *UGP2* gene from wild type, *UGP2* knock-out (KO) and  
1109 *UGP2* knock-in H9 ESCs (KI). The A at the start of the coding sequence of *UGP2* isoform 2  
1110 (short isoform) is highlighted. The homozygous insertion of an additional A in knockout and  
1111 the mutation into a G in knock-in cells are indicated.  
1112 C) Western blot detecting *UGP2* and vinculin in wild type ESC, heterozygous and homozygous  
1113 knockout and knock-in ESCs, as indicated. Note the complete loss of *UGP2* in KO cells, and  
1114 the loss of the short isoform in KI cells.  
1115 D) RT-qPCR detecting the pluripotency factors *OCT4*, *NANOG* and *REX1* in H9 wild type, *UGP2*  
1116 knock-in (KI) and *UGP2* knock-out (KO) ESCs, normalized for the house keeping control *TBP*.  
1117 Mean fold change compared to wild type of two biological replicates and three technical  
1118 replicates is shown; error bars represent SEM, \* =  $p < 0.05$ , unpaired t-test, two-tailed.  
1119 E) Bright field image of a representative ESC colony from wild type parental and *UGP2* KO ESCs.

1120 **Supplementary Figure 4, related to Figure 4, NSC differentiation**

- 1121 A) Schematic drawing of the differentiation procedure, see online methods for details.  
1122 B) Bright field image showing representative pictures from ESCs and differentiated NSCs.  
1123 C) qRT-PCR analysis for pluripotency markers (*NANOG*, *OCT4 (POU5F1)*, *REX1*) and genes  
1124 expressed in NSCs (*PAX6*, *GFAP*) in WT, *UGP2* KO and KI differentiated NSCs at p1 and p5.  
1125 Mean fold change compared to wild type of two biological replicates and two technical  
1126 replicates is shown; error bars represent SEM.  
1127 D) Western blotting showing *UGP2* expression in WT, *UGP2* KI and KO differentiated NSCs.  
1128 Vinculin is used as a housekeeping control.  
1129 E) Quantification of total *UGP2* protein levels by Western blot, as determined by the relative  
1130 expression to the housekeeping control vinculin. Bar graph showing the results from two  
1131 independent experiments; error bars represent SEM.  
1132 F) qRT-PCR analysis of *UGP2* in NSCs or KO NSCs rescued with either the long wild type or long  
1133 mutant *UGP2* isoform. Mean fold change compared to wild type is shown for two biological  
1134 replicates and three technical replicates; error bars represent SEM.

1135

1136 **Supplementary Figure 5: RNA-seq, related to Figure 4**

- 1137 A) Scatter plot showing the pair wise correlation between biological replicates.  
1138 B) Heat map displaying Pearson correlation between biological replicates.  
1139 C) Table summarizing up- (FDR<0.05 and LogFC>1) and down regulated (FDR<0.05 and LogFC<-  
1140 1) genes in WT, KO and KI ESCs.  
1141 D) Table summarizing up- (FDR<0.05 and LogFC>1) and down regulated (FDR<0.05 and LogFC<-  
1142 1) genes in WT, KO and KI ESC upon differentiation in NSCs.  
1143 E) Table summarizing up- (FDR<0.05 and LogFC>1) and down regulated (FDR<0.05 and LogFC<-  
1144 1) genes in WT, KO and KI NSCs.  
1145 F) Heat map visualizing gene expression (in log<sub>2</sub>(RPKM+1)) and clustering of WT, KO and KI ESCs  
1146 and NSCs, for a panel of ESC and NSC specific genes (see methods)

1147

1148 **Supplementary Figure 6, related to Figure 4: UGP2 mutant induced pluripotent stem cells**

- 1149 A) Immunofluorescence of iPSC clones used in this study derived from Family 1 (three clones  
1150 per individual) showing iPSC colonies stained for the pluripotency markers TRA1-81 (red) and  
1151 OCT4 (green) (left panel) or SSEA4 (red) and NANOG (green) (right panel). Nuclei are stained  
1152 with DAPI (blue).  
1153 B) qRT-PCR expression analysis for the indicated pluripotency associated genes in 4 wild type  
1154 control human embryonic stem cell lines and the iPSCs derived from family 1. Mean fold  
1155 change compared to human embryonic stem cells of three biological replicates (e.g.  
1156 individual clones from A) and three technical replicates is shown; error bars represent SEM.  
1157 No statistically significant differences were found, unpaired t-test, two-tailed.  
1158 C) Sanger sequencing of representative iPSC clones confirming the presence of the  
1159 chr2:64083454A>G *UGP2* mutation in a heterozygous state in clones derived from parents  
1160 and homozygous state in clones derived from the affected child.  
1161 D) qRT-PCR expression analysis upon differentiation for pluripotency (*NANOG*, *OCT4*  
1162 (*POUF51*), *REX1*) and NSC markers (*PAX6*, *GFAP*), for H9 ESC control and heterozygous and  
1163 homozygous iPSCs derived from family 1. Mean fold change compared to human embryonic  
1164 stem cells of three biological replicates (e.g. individual clones from A) and two technical  
1165 replicates is shown; normalized to *TBP*; error bars represent SEM.  
1166 E) qRT-PCR expression analysis in iPSC-derived NSCs for genes that showed differential  
1167 expression in RNA-seq experiments, e.g. *NNAT*, *FGFBP3*, *ID4* and *PLAU*. Mean fold change for  
1168 cells obtained from the affected child compared to cells obtained from its parents (set to 1)  
1169 of three biological replicates (e.g. individual clones from A) and two technical replicates is  
1170 shown; normalized to *TBP*; error bars represent SEM.

1171

1172 **Supplementary Figure 7: related to figure 5**

- 1173 A) UGP2 enzymatic activity in WT, UGP2 KI, KO and KO ESCs rescued with wildtype isoform 1 or  
1174 mutant Met12Val isoform 1 of UGP2. Plotted is the mean from two replicate experiments,  
1175 error bar is SEM. \*\*\*=p<0.001, unpaired t-test, two-tailed.

- 1176 B) UGP2 enzymatic activity in iPSC derived NSCs from family 1. Plotted is the mean from two  
1177 replicate experiments, measuring each the results for the three clones for each individual,  
1178 error bar is SEM.  $*=p<0.05$ ; unpaired t-test, two-tailed.
- 1179 C) PAS staining in WT and UGP2 KO ESCs. Nuclei are counterstained with hematoxylin (blue).
- 1180 D) Quantification of the PAS stained area in WT, KI and KO ESCs. Shown is the average PAS  
1181 positive area per genotype from two biological replicates, each stained in two experiments;  
1182 error bars are SD.  $***=p<0.001$ , unpaired t-test, two-tailed.
- 1183 E) Glycogen granules detected by PAS staining in iPSC-derived NSCs from family 1 after 48 hours  
1184 culture under low-oxygen conditions. Number of granules for paternal cell line are set at  
1185 100%. Average of three biological and two technical replicates per genotype, with each  $n=80$ -  
1186 100 cells counted. Error bars represent SD,  $***=p<0.001$ , unpaired t-test, two-tailed.
- 1187 F) Western blotting detecting LAMP2 (upper panel) and the house keeping control actin (lower  
1188 panel) in cellular extracts from ESCs, that are WT, UGP2 KI, or KO. Compare to Figure 5D.
- 1189 G) qRT-PCR expression analysis for UPR marker genes (spliced *XBP1*, *HSPA5*, *ATF4* and *EDEM*) in  
1190 WT, UGP2 KI, KO and rescue ESCs. Shown is the mean fold change for the indicated genes  
1191 compared to wild type, normalized for the housekeeping gene *TBP*. Results of two biological  
1192 and three technical replicates are plotted from two experiments. Error bars represent SEM;  
1193  $*=p<0.05$ , unpaired t-test, two-tailed).
- 1194 H) qRT-PCR expression analysis for UPR marker genes (spliced *XBP1*, *HSPA5*, *ATF4* and *EDEM*) in  
1195 in primary fibroblasts from family 1. Shown is the mean fold change for the indicated genes  
1196 compared to wild type, normalized for the housekeeping gene *TBP*. Results of two  
1197 experiments with each three technical replicates are plotted. Error bars represent SEM;  $*=$   
1198  $p<0.05$ , unpaired t-test, two-tailed.

1199 **Supplementary Table 1:** Extended clinical characteristics of 11 patients with homozygous UGP2  
1200 variants

1201 **Supplementary Table 2:** RNA-seq data used in this study

1202 **Supplementary Table 3:** differentially expressed genes

1203 **Supplementary Table 4:** enrichment analysis

1204 **Supplementary Table 5:** UGP2 variants in *gnomAD*

1205 **Supplementary Table 6:** genome-wide homology search results

1206 **Supplementary Table 7:** *gnomAD* data of 247 disease candidate genes

1207 **Supplementary Table 8:** Oligonucleotides used in this study

1208 **Supplemental Movie 1:** wild type zebrafish eye movements

1209 **Supplemental Movie 2:** Ugp2a/b double mutant zebrafish eye movements

1210 **Supplementary Case Reports**

1211 **Supplementary Note:** additional example of an isoform start codon alteration of an essential gene

1212 **References:**

- 1213 1. Kalsner, J. & Cross, J.H. The epileptic encephalopathy jungle - from Dr West to the concepts of  
1214 aetiology-related and developmental encephalopathies. *Curr Opin Neurol* **31**, 216-222  
1215 (2018).
- 1216 2. McTague, A., Howell, K.B., Cross, J.H., Kurian, M.A. & Scheffer, I.E. The genetic landscape of  
1217 the epileptic encephalopathies of infancy and childhood. *Lancet Neurol* **15**, 304-16 (2016).
- 1218 3. Epi, K.C. *et al.* De novo mutations in epileptic encephalopathies. *Nature* **501**, 217-21 (2013).
- 1219 4. Nashabat, M. *et al.* The landscape of early infantile epileptic encephalopathy in a  
1220 consanguineous population. *Seizure* **69**, 154-172 (2019).
- 1221 5. Papuc, S.M. *et al.* The role of recessive inheritance in early-onset epileptic encephalopathies:  
1222 a combined whole-exome sequencing and copy number study. *Eur J Hum Genet* **27**, 408-421  
1223 (2019).
- 1224 6. Bartha, I., di Iulio, J., Venter, J.C. & Telenti, A. Human gene essentiality. *Nat Rev Genet* **19**, 51-  
1225 62 (2018).
- 1226 7. Robbins, S.M., Thimm, M.A., Valle, D. & Jelin, A.C. Genetic diagnosis in first or second  
1227 trimester pregnancy loss using exome sequencing: a systematic review of human essential  
1228 genes. *J Assist Reprod Genet* **36**, 1539-1548 (2019).
- 1229 8. Fuhring, J. *et al.* Octamerization is essential for enzymatic function of human UDP-glucose  
1230 pyrophosphorylase. *Glycobiology* **23**, 426-37 (2013).
- 1231 9. Fuhring, J.I. *et al.* A quaternary mechanism enables the complex biological functions of  
1232 octameric human UDP-glucose pyrophosphorylase, a key enzyme in cell metabolism. *Sci Rep*  
1233 **5**, 9618 (2015).
- 1234 10. Yu, Q. & Zheng, X. The crystal structure of human UDP-glucose pyrophosphorylase reveals a  
1235 latch effect that influences enzymatic activity. *Biochem J* **442**, 283-91 (2012).
- 1236 11. Turnquist, R.L., Gillett, T.A. & Hansen, R.G. Uridine diphosphate glucose pyrophosphorylase.  
1237 Crystallization and properties of the enzyme from rabbit liver and species comparisons. *J Biol*  
1238 *Chem* **249**, 7695-700 (1974).
- 1239 12. Flores-Diaz, M. *et al.* Cellular UDP-glucose deficiency caused by a single point mutation in the  
1240 UDP-glucose pyrophosphorylase gene. *J Biol Chem* **272**, 23784-91 (1997).
- 1241 13. Higueta, J.C., Alape-Giron, A., Thelestam, M. & Katz, A. A point mutation in the UDP-glucose  
1242 pyrophosphorylase gene results in decreases of UDP-glucose and inactivation of glycogen  
1243 synthase. *Biochem J* **370**, 995-1001 (2003).
- 1244 14. Adeva-Andany, M.M., Gonzalez-Lucan, M., Donapetry-Garcia, C., Fernandez-Fernandez, C. &  
1245 Ameneiros-Rodriguez, E. Glycogen metabolism in humans. *BBA Clin* **5**, 85-100 (2016).
- 1246 15. Magee, C., Nurminskaya, M. & Linsenmayer, T.F. UDP-glucose pyrophosphorylase: up-  
1247 regulation in hypertrophic cartilage and role in hyaluronan synthesis. *Biochem J* **360**, 667-74  
1248 (2001).
- 1249 16. Vigetti, D., Viola, M., Karousou, E., De Luca, G. & Passi, A. Metabolic control of hyaluronan  
1250 synthases. *Matrix Biol* **35**, 8-13 (2014).
- 1251 17. Perkins, K.L., Arranz, A.M., Yamaguchi, Y. & Hrabetova, S. Brain extracellular space,  
1252 hyaluronan, and the prevention of epileptic seizures. *Rev Neurosci* **28**, 869-892 (2017).
- 1253 18. Soleman, S., Filippov, M.A., Dityatev, A. & Fawcett, J.W. Targeting the neural extracellular  
1254 matrix in neurological disorders. *Neuroscience* **253**, 194-213 (2013).
- 1255 19. Cope, E.C. & Gould, E. Adult Neurogenesis, Glia, and the Extracellular Matrix. *Cell Stem Cell*  
1256 **24**, 690-705 (2019).
- 1257 20. Arranz, A.M. *et al.* Hyaluronan deficiency due to Has3 knock-out causes altered neuronal  
1258 activity and seizures via reduction in brain extracellular space. *J Neurosci* **34**, 6164-76 (2014).
- 1259 21. Zeng, C., Xing, W. & Liu, Y. Identification of UGP2 as a progression marker that promotes cell  
1260 growth and motility in human glioma. *J Cell Biochem* **120**, 12489-12499 (2019).

- 1261 22. Li, S., Hu, Z., Zhao, Y., Huang, S. & He, X. Transcriptome-Wide Analysis Reveals the Landscape  
1262 of Aberrant Alternative Splicing Events in Liver Cancer. *Hepatology* **69**, 359-375 (2019).
- 1263 23. Li, Y. *et al.* Multiomics Integration Reveals the Landscape of Prometastasis Metabolism in  
1264 Hepatocellular Carcinoma. *Mol Cell Proteomics* **17**, 607-618 (2018).
- 1265 24. Wang, L. *et al.* Expression of UGP2 and CFL1 expression levels in benign and malignant  
1266 pancreatic lesions and their clinicopathological significance. *World J Surg Oncol* **16**, 11 (2018).
- 1267 25. Wang, Q. *et al.* SHP2 and UGP2 are Biomarkers for Progression and Poor Prognosis of  
1268 Gallbladder Cancer. *Cancer Invest* **34**, 255-64 (2016).
- 1269 26. Tan, G.S. *et al.* Novel proteomic biomarker panel for prediction of aggressive metastatic  
1270 hepatocellular carcinoma relapse in surgically resectable patients. *J Proteome Res* **13**, 4833-  
1271 46 (2014).
- 1272 27. Thorsen, K. *et al.* Tumor-specific usage of alternative transcription start sites in colorectal  
1273 cancer identified by genome-wide exon array analysis. *BMC Genomics* **12**, 505 (2011).
- 1274 28. de Jonge, H.J. *et al.* Gene expression profiling in the leukemic stem cell-enriched CD34+  
1275 fraction identifies target genes that predict prognosis in normal karyotype AML. *Leukemia*  
1276 **25**, 1825-33 (2011).
- 1277 29. Perenthaler, E., Yousefi, S., Niggli, E. & Barakat, T.S. Beyond the Exome: The Non-coding  
1278 Genome and Enhancers in Neurodevelopmental Disorders and Malformations of Cortical  
1279 Development. *Front Cell Neurosci* **13**, 352 (2019).
- 1280 30. Jenkins, Z.A. *et al.* Differential regulation of two FLNA transcripts explains some of the  
1281 phenotypic heterogeneity in the loss-of-function filaminopathies. *Hum Mutat* **39**, 103-113  
1282 (2018).
- 1283 31. Gostynska, K.B. *et al.* Mutation in exon 1a of PLEC, leading to disruption of plectin isoform 1a,  
1284 causes autosomal-recessive skin-only epidermolysis bullosa simplex. *Hum Mol Genet* **24**,  
1285 3155-62 (2015).
- 1286 32. Li, J. *et al.* Point Mutations in Exon 1B of APC Reveal Gastric Adenocarcinoma and Proximal  
1287 Polyposis of the Stomach as a Familial Adenomatous Polyposis Variant. *Am J Hum Genet* **98**,  
1288 830-842 (2016).
- 1289 33. Ta-Shma, A. *et al.* Mutations in TMEM260 Cause a Pediatric Neurodevelopmental, Cardiac,  
1290 and Renal Syndrome. *Am J Hum Genet* **100**, 666-675 (2017).
- 1291 34. Sobreira, N., Schiettecatte, F., Valle, D. & Hamosh, A. GeneMatcher: a matching tool for  
1292 connecting investigators with an interest in the same gene. *Hum Mutat* **36**, 928-30 (2015).
- 1293 35. Consortium, G.T. The Genotype-Tissue Expression (GTEx) project. *Nat Genet* **45**, 580-5  
1294 (2013).
- 1295 36. Epi25 Collaborative. Electronic address, s.b.u.e.a. & Epi, C. Ultra-Rare Genetic Variation in the  
1296 Epilepsies: A Whole-Exome Sequencing Study of 17,606 Individuals. *Am J Hum Genet* (2019).
- 1297 37. Landrum, M.J. *et al.* ClinVar: public archive of relationships among sequence variation and  
1298 human phenotype. *Nucleic Acids Res* **42**, D980-5 (2014).
- 1299 38. Fokkema, I.F. *et al.* LOVD v.2.0: the next generation in gene variant databases. *Hum Mutat*  
1300 **32**, 557-63 (2011).
- 1301 39. Exome Variant Server NHLBI GO Exome Sequencing Project (ESP) Seattle WA. (accessed Juli  
1302 2019).
- 1303 40. Firth, H.V. *et al.* DECIPHER: Database of Chromosomal Imbalance and Phenotype in Humans  
1304 Using Ensembl Resources. *Am J Hum Genet* **84**, 524-33 (2009).
- 1305 41. Gonzalez, M. *et al.* Innovative genomic collaboration using the GENESIS (GEM.app) platform.  
1306 *Hum Mutat* **36**, 950-6 (2015).
- 1307 42. Scott, E.M. *et al.* Characterization of Greater Middle Eastern genetic variation for enhanced  
1308 disease gene discovery. *Nat Genet* **48**, 1071-6 (2016).
- 1309 43. Fattahi, Z. *et al.* Iranome: A catalog of genomic variations in the Iranian population. *Hum*  
1310 *Mutat* (2019).
- 1311 44. Lek, M. *et al.* Analysis of protein-coding genetic variation in 60,706 humans. *Nature* **536**, 285-  
1312 91 (2016).



- 1313 45. Rentzsch, P., Witten, D., Cooper, G.M., Shendure, J. & Kircher, M. CADD: predicting the  
1314 deleteriousness of variants throughout the human genome. *Nucleic Acids Res* **47**, D886-D894  
1315 (2019).
- 1316 46. Schwarz, J.M., Cooper, D.N., Schuelke, M. & Seelow, D. MutationTaster2: mutation  
1317 prediction for the deep-sequencing age. *Nat Methods* **11**, 361-2 (2014).
- 1318 47. BALUCHISTAN i. Geography, History and Ethnography. in *Encyclopædia Iranica* Vol. III fasc. 6,  
1319 pp 598-632 (2010).
- 1320 48. Roadmap Epigenomics, C. *et al.* Integrative analysis of 111 reference human epigenomes.  
1321 *Nature* **518**, 317-30 (2015).
- 1322 49. Yan, L. *et al.* Epigenomic Landscape of Human Fetal Brain, Heart, and Liver. *J Biol Chem* **291**,  
1323 4386-98 (2016).
- 1324 50. Hwang, T. *et al.* Dynamic regulation of RNA editing in human brain development and disease.  
1325 *Nat Neurosci* **19**, 1093-9 (2016).
- 1326 51. Shih, H.P. *et al.* A Gene Regulatory Network Cooperatively Controlled by Pdx1 and Sox9  
1327 Governs Lineage Allocation of Foregut Progenitor Cells. *Cell Rep* **13**, 326-36 (2015).
- 1328 52. Mair, B. *et al.* Essential Gene Profiles for Human Pluripotent Stem Cells Identify  
1329 Uncharacterized Genes and Substrate Dependencies. *Cell Rep* **27**, 599-615 e12 (2019).
- 1330 53. Yilmaz, A., Peretz, M., Aharony, A., Sagi, I. & Benvenisty, N. Defining essential genes for  
1331 human pluripotent stem cells by CRISPR-Cas9 screening in haploid cells. *Nat Cell Biol* **20**, 610-  
1332 619 (2018).
- 1333 54. Turnbull, J. *et al.* Lafora disease. *Epileptic Disord* **18**, 38-62 (2016).
- 1334 55. Sharma, J., Rao, S.N., Shankar, S.K., Satishchandra, P. & Jana, N.R. Lafora disease ubiquitin  
1335 ligase malin promotes proteasomal degradation of neuronatin and regulates glycogen  
1336 synthesis. *Neurobiol Dis* **44**, 133-41 (2011).
- 1337 56. Sharma, J. *et al.* Neuronatin-mediated aberrant calcium signaling and endoplasmic reticulum  
1338 stress underlie neuropathology in Lafora disease. *J Biol Chem* **288**, 9482-90 (2013).
- 1339 57. Shinde, V., Pitale, P.M., Howse, W., Gorbatyuk, O. & Gorbatyuk, M. Neuronatin is a stress-  
1340 responsive protein of rod photoreceptors. *Neuroscience* **328**, 1-8 (2016).
- 1341 58. Sel, S. *et al.* Temporal and spatial expression pattern of Nnat during mouse eye development.  
1342 *Gene Expr Patterns* **23-24**, 7-12 (2017).
- 1343 59. Salyakina, D. *et al.* Copy number variants in extended autism spectrum disorder families  
1344 reveal candidates potentially involved in autism risk. *PLoS One* **6**, e26049 (2011).
- 1345 60. Li, Y. *et al.* Temporal and spatial expression of fgfbp genes in zebrafish. *Gene* **659**, 128-136  
1346 (2018).
- 1347 61. Tassi, E. *et al.* Fibroblast Growth Factor Binding Protein 3 (FGFBP3) impacts carbohydrate and  
1348 lipid metabolism. *Sci Rep* **8**, 15973 (2018).
- 1349 62. Oikari, L.E. *et al.* Cell surface heparan sulfate proteoglycans as novel markers of human  
1350 neural stem cell fate determination. *Stem Cell Res* **16**, 92-104 (2016).
- 1351 63. Lugert, S. *et al.* Glypican-2 levels in cerebrospinal fluid predict the status of adult  
1352 hippocampal neurogenesis. *Sci Rep* **7**, 46543 (2017).
- 1353 64. Diotel, N., Beil, T., Strahle, U. & Rastegar, S. Differential expression of id genes and their  
1354 potential regulator znf238 in zebrafish adult neural progenitor cells and neurons suggests  
1355 distinct functions in adult neurogenesis. *Gene Expr Patterns* **19**, 1-13 (2015).
- 1356 65. Okazaki, T. *et al.* Epileptic phenotype of FGFR3-related bilateral medial temporal lobe  
1357 dysgenesis. *Brain Dev* **39**, 67-71 (2017).
- 1358 66. Kyyriäinen, J. *et al.* Deficiency of urokinase-type plasminogen activator and its receptor  
1359 affects social behavior and increases seizure susceptibility. *Epilepsy Res* **151**, 67-74 (2019).
- 1360 67. Hua, S. *et al.* High expression of GALNT7 promotes invasion and proliferation of glioma cells.  
1361 *Oncol Lett* **16**, 6307-6314 (2018).
- 1362 68. Guo, H. *et al.* O-Linked N-Acetylglucosamine (O-GlcNAc) Expression Levels Epigenetically  
1363 Regulate Colon Cancer Tumorigenesis by Affecting the Cancer Stem Cell Compartment via  
1364 Modulating Expression of Transcriptional Factor MYBL1. *J Biol Chem* **292**, 4123-4137 (2017).

- 1365 69. Pescador, N. *et al.* Hypoxia promotes glycogen accumulation through hypoxia inducible  
1366 factor (HIF)-mediated induction of glycogen synthase 1. *PLoS One* **5**, e9644 (2010).
- 1367 70. Duran, J., Saez, I., Gruart, A., Guinovart, J.J. & Delgado-Garcia, J.M. Impairment in long-term  
1368 memory formation and learning-dependent synaptic plasticity in mice lacking glycogen  
1369 synthase in the brain. *J Cereb Blood Flow Metab* **33**, 550-6 (2013).
- 1370 71. Lopez-Ramos, J.C., Duran, J., Gruart, A., Guinovart, J.J. & Delgado-Garcia, J.M. Role of brain  
1371 glycogen in the response to hypoxia and in susceptibility to epilepsy. *Front Cell Neurosci* **9**,  
1372 431 (2015).
- 1373 72. Choi, H.B. *et al.* Metabolic communication between astrocytes and neurons via bicarbonate-  
1374 responsive soluble adenylyl cyclase. *Neuron* **75**, 1094-104 (2012).
- 1375 73. Xu, J. *et al.* Requirement of glycogenolysis for uptake of increased extracellular K<sup>+</sup> in  
1376 astrocytes: potential implications for K<sup>+</sup> homeostasis and glycogen usage in brain.  
1377 *Neurochem Res* **38**, 472-85 (2013).
- 1378 74. Schousboe, A., Sickmann, H.M., Walls, A.B., Bak, L.K. & Waagepetersen, H.S. Functional  
1379 importance of the astrocytic glycogen-shunt and glycolysis for maintenance of an intact  
1380 intra/extracellular glutamate gradient. *Neurotox Res* **18**, 94-9 (2010).
- 1381 75. Wang, X. *et al.* Histone H3K4 methyltransferase Mll1 regulates protein glycosylation and  
1382 tunicamycin-induced apoptosis through transcriptional regulation. *Biochim Biophys Acta*  
1383 **1843**, 2592-602 (2014).
- 1384 76. Kuil, L.E. *et al.* Hexb enzyme deficiency leads to lysosomal abnormalities in radial glia and  
1385 microglia in zebrafish brain development. *Glia* **67**, 1705-1718 (2019).
- 1386 77. Narasimhan, V.M. *et al.* Health and population effects of rare gene knockouts in adult  
1387 humans with related parents. *Science* **352**, 474-7 (2016).
- 1388 78. Saleheen, D. *et al.* Human knockouts and phenotypic analysis in a cohort with a high rate of  
1389 consanguinity. *Nature* **544**, 235-239 (2017).
- 1390 79. Sulem, P. *et al.* Identification of a large set of rare complete human knockouts. *Nat Genet* **47**,  
1391 448-52 (2015).
- 1392 80. Blomen, V.A. *et al.* Gene essentiality and synthetic lethality in haploid human cells. *Science*  
1393 **350**, 1092-6 (2015).
- 1394 81. Bakke, J. *et al.* Genome-wide CRISPR screen reveals PSMA6 to be an essential gene in  
1395 pancreatic cancer cells. *BMC Cancer* **19**, 253 (2019).
- 1396 82. Bertomeu, T. *et al.* A High-Resolution Genome-Wide CRISPR/Cas9 Viability Screen Reveals  
1397 Structural Features and Contextual Diversity of the Human Cell-Essential Proteome. *Mol Cell*  
1398 *Biol* **38**(2018).
- 1399 83. Wang, T. *et al.* Identification and characterization of essential genes in the human genome.  
1400 *Science* **350**, 1096-101 (2015).
- 1401 84. Wang, X. *et al.* BRD9 defines a SWI/SNF sub-complex and constitutes a specific vulnerability  
1402 in malignant rhabdoid tumors. *Nat Commun* **10**, 1881 (2019).
- 1403 85. Hart, T. *et al.* High-Resolution CRISPR Screens Reveal Fitness Genes and Genotype-Specific  
1404 Cancer Liabilities. *Cell* **163**, 1515-26 (2015).
- 1405 86. Daran, J.M., Bell, W. & Francois, J. Physiological and morphological effects of genetic  
1406 alterations leading to a reduced synthesis of UDP-glucose in *Saccharomyces cerevisiae*. *FEMS*  
1407 *Microbiol Lett* **153**, 89-96 (1997).
- 1408 87. Daran, J.M., Dallies, N., Thines-Sempoux, D., Paquet, V. & Francois, J. Genetic and  
1409 biochemical characterization of the UGP1 gene encoding the UDP-glucose  
1410 pyrophosphorylase from *Saccharomyces cerevisiae*. *Eur J Biochem* **233**, 520-30 (1995).
- 1411 88. Li, M. *et al.* UDP-glucose pyrophosphorylase influences polysaccharide synthesis, cell wall  
1412 components, and hyphal branching in *Ganoderma lucidum* via regulation of the balance  
1413 between glucose-1-phosphate and UDP-glucose. *Fungal Genet Biol* **82**, 251-63 (2015).
- 1414 89. Chen, R. *et al.* Rice UDP-glucose pyrophosphorylase1 is essential for pollen callose deposition  
1415 and its cosuppression results in a new type of thermosensitive genic male sterility. *Plant Cell*  
1416 **19**, 847-61 (2007).

- 1417 90. Park, J.I. *et al.* UDP-glucose pyrophosphorylase is rate limiting in vegetative and reproductive  
1418 phases in *Arabidopsis thaliana*. *Plant Cell Physiol* **51**, 981-96 (2010).
- 1419 91. Woo, M.O. *et al.* Inactivation of the UGPase1 gene causes genic male sterility and endosperm  
1420 chalkiness in rice (*Oryza sativa* L.). *Plant J* **54**, 190-204 (2008).
- 1421 92. Tian, D. *et al.* Identifying mouse developmental essential genes using machine learning. *Dis*  
1422 *Model Mech* **11**(2018).
- 1423 93. Jumbo-Lucioni, P.P., Parkinson, W.M., Kopke, D.L. & Broadie, K. Coordinated movement,  
1424 neuromuscular synaptogenesis and trans-synaptic signaling defects in *Drosophila*  
1425 galactosemia models. *Hum Mol Genet* **25**, 3699-3714 (2016).
- 1426 94. Tsai, F.Y. *et al.* An early haematopoietic defect in mice lacking the transcription factor GATA-  
1427 2. *Nature* **371**, 221-6 (1994).
- 1428 95. de Pater, E. *et al.* Gata2 is required for HSC generation and survival. *J Exp Med* **210**, 2843-50  
1429 (2013).
- 1430 96. Binder, J. *et al.* Clinical and molecular findings in a patient with a novel mutation in the  
1431 deafness-dystonia peptide (DDP1) gene. *Brain* **126**, 1814-20 (2003).
- 1432 97. Caridi, G. *et al.* A novel mutation in the albumin gene (c.1A>C) resulting in analbuminemia.  
1433 *Eur J Clin Invest* **43**, 72-8 (2013).
- 1434 98. McKenna, A. *et al.* The Genome Analysis Toolkit: a MapReduce framework for analyzing next-  
1435 generation DNA sequencing data. *Genome Res* **20**, 1297-303 (2010).
- 1436 99. Retterer, K. *et al.* Clinical application of whole-exome sequencing across clinical indications.  
1437 *Genet Med* **18**, 696-704 (2016).
- 1438 100. Snoeijen-Schouwenaars, F.M. *et al.* Diagnostic exome sequencing in 100 consecutive patients  
1439 with both epilepsy and intellectual disability. *Epilepsia* **60**, 155-164 (2019).
- 1440 101. Mencacci, N.E. *et al.* De Novo Mutations in PDE10A Cause Childhood-Onset Chorea with  
1441 Bilateral Striatal Lesions. *Am J Hum Genet* **98**, 763-71 (2016).
- 1442 102. Trujillano, D. *et al.* Clinical exome sequencing: results from 2819 samples reflecting 1000  
1443 families. *Eur J Hum Genet* **25**, 176-182 (2017).
- 1444 103. Bayer SA, A.J. (ed.) *Atlas of human central nervous system development, Vol 2: The human*  
1445 *brain during the third trimester* (CRC Press, Boca Raton, 2004).
- 1446 104. Bayer SA, A.J. (ed.) *Atlas of human central nervous system development, Vol 3: The human*  
1447 *brain during the second trimester*, (CRC Press, Boca Raton, 2005).
- 1448 105. Bayer SA, A.J. (ed.) *Atlas of human central nervous system development, Vol 4: The human*  
1449 *brain during the late first trimester*, (CRC Press, Boca Raton, 2006).
- 1450 106. Bayer SA, A.J. (ed.) *Atlas of human central nervous system development, Vol 5: The human*  
1451 *brain during the early first trimester*, (CRC Press, Boca Raton, 2008).
- 1452 107. Barakat, T.S. *et al.* Functional Dissection of the Enhancer Repertoire in Human Embryonic  
1453 Stem Cells. *Cell Stem Cell* **23**, 276-288 e8 (2018).
- 1454 108. Barakat, T.S. *et al.* Stable X chromosome reactivation in female human induced pluripotent  
1455 stem cells. *Stem Cell Reports* **4**, 199-208 (2015).
- 1456 109. Barakat, T.S. & Gribnau, J. X chromosome inactivation and embryonic stem cells. *Adv Exp*  
1457 *Med Biol* **695**, 132-54 (2010).
- 1458 110. Barakat, T.S. & Gribnau, J. Generation of knockout alleles by RFLP based BAC targeting of  
1459 polymorphic embryonic stem cells. *Methods Mol Biol* **1227**, 143-80 (2015).
- 1460 111. Renaud, J.B. *et al.* Improved Genome Editing Efficiency and Flexibility Using Modified  
1461 Oligonucleotides with TALEN and CRISPR-Cas9 Nucleases. *Cell Rep* **14**, 2263-2272 (2016).
- 1462 112. Chambers, S.M. *et al.* Highly efficient neural conversion of human ES and iPS cells by dual  
1463 inhibition of SMAD signaling. *Nat Biotechnol* **27**, 275-80 (2009).
- 1464 113. Kim, D., Langmead, B. & Salzberg, S.L. HISAT: a fast spliced aligner with low memory  
1465 requirements. *Nat Methods* **12**, 357-60 (2015).
- 1466 114. Anders, S., Pyl, P.T. & Huber, W. HTSeq--a Python framework to work with high-throughput  
1467 sequencing data. *Bioinformatics* **31**, 166-9 (2015).

- 1468 115. Lawrence, M. *et al.* Software for computing and annotating genomic ranges. *PLoS Comput*  
1469 *Biol* **9**, e1003118 (2013).
- 1470 116. Robinson, M.D., McCarthy, D.J. & Smyth, G.K. edgeR: a Bioconductor package for differential  
1471 expression analysis of digital gene expression data. *Bioinformatics* **26**, 139-40 (2010).
- 1472 117. Zhou, Y. *et al.* Metascape provides a biologist-oriented resource for the analysis of systems-  
1473 level datasets. *Nat Commun* **10**, 1523 (2019).
- 1474 118. Raudvere, U. *et al.* g:Profiler: a web server for functional enrichment analysis and  
1475 conversions of gene lists (2019 update). *Nucleic Acids Res* **47**, W191-W198 (2019).
- 1476 119. Kuleshov, M.V. *et al.* Enrichr: a comprehensive gene set enrichment analysis web server 2016  
1477 update. *Nucleic Acids Res* **44**, W90-7 (2016).
- 1478 120. Ying, D. *et al.* HaploShare: identification of extended haplotypes shared by cases and  
1479 evaluation against controls. *Genome Biol* **16**, 92 (2015).
- 1480 121. Turton, K.B., Esnault, S., Delain, L.P. & Mosher, D.F. Merging Absolute and Relative  
1481 Quantitative PCR Data to Quantify STAT3 Splice Variant Transcripts. *J Vis Exp* (2016).
- 1482 122. Brinkman, E.K., Chen, T., Amendola, M. & van Steensel, B. Easy quantitative assessment of  
1483 genome editing by sequence trace decomposition. *Nucleic Acids Res* **42**, e168 (2014).
- 1484 123. Lindhout, M., Rubio-Gozalbo, M.E., Bakker, J.A. & Bierau, J. Direct non-radioactive assay of  
1485 galactose-1-phosphate:uridylyltransferase activity using high performance liquid  
1486 chromatography. *Clin Chim Acta* **411**, 980-3 (2010).

1487

# Figure 1

**A**

Pictures of patients will be made available upon publication of the peer-reviewed version of this preprint

**B**

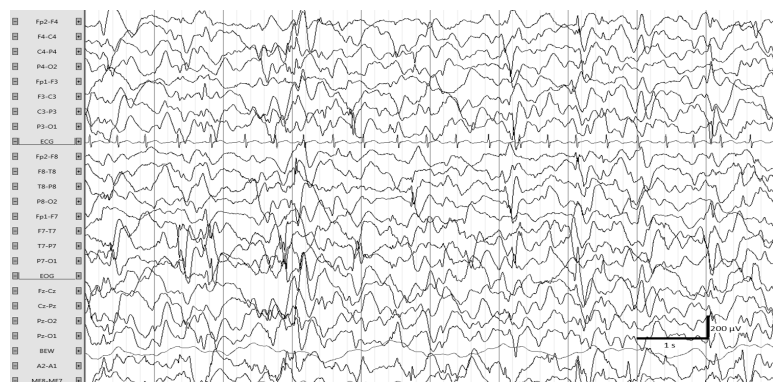

**C**

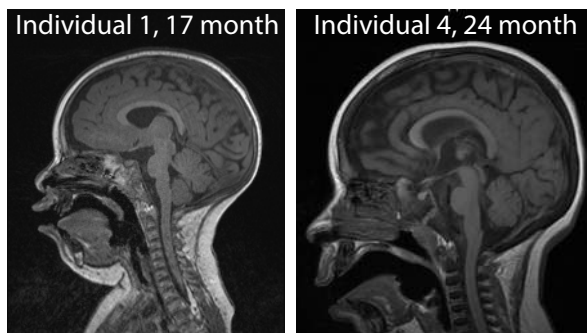

**D**

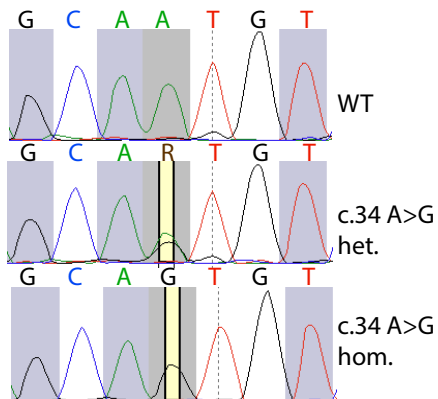

**E**

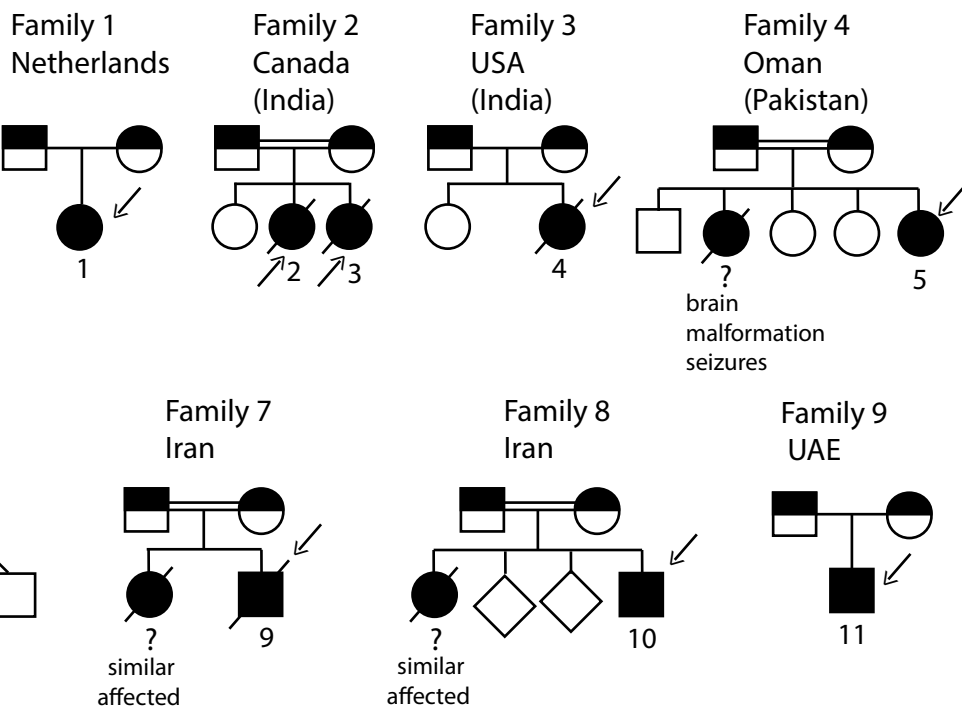

**F**

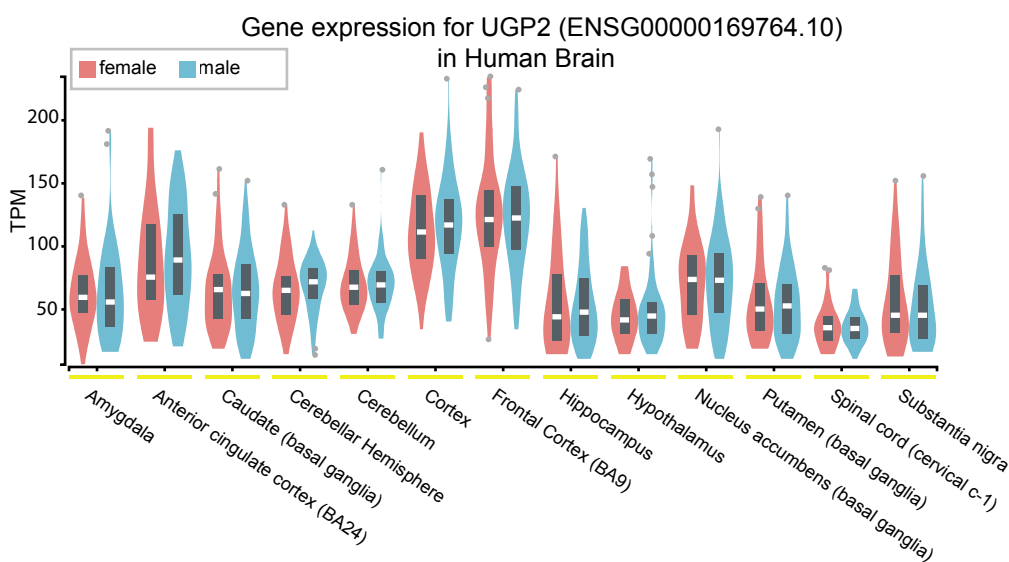

**G**

|                        |                    |
|------------------------|--------------------|
| Human                  | agcaaagcaatgtctcaa |
| Chimp                  | agcaaagcaatgtctcaa |
| Gorilla                | agcaaagcaatgtctcaa |
| Orangutan              | agcaaagcaatgtctcaa |
| Gibbon                 | agcaaagcaatgtctcaa |
| Rhesus                 | agcaaagcaatgtctcaa |
| Crab-eating macaque    | agcaaagcaatgtctcaa |
| Baboon                 | agcaaagcaatgtctcaa |
| Green monkey           | agcaaagcaatgtctcaa |
| Marmoset               | agcaaagcaatgtctcaa |
| Squirrel monkey        | agcaaagcaatgtctcaa |
| Bushbaby               | agcaaagcaatgtctcaa |
| Chinese tree shrew     | agcaaagcaatgtctcaa |
| Squirrel               | agcaaagcaatgtctcaa |
| Lesser Egyptian jerboa | agcaaagcaatgtctcaa |
| Prairie vole           | agcaaagcaatgtctcaa |
| Chinese hamster        | agcaaagcaatgtctcaa |
| Golden hamster         | agcaaagcaatgtctcaa |
| Mouse                  | agcaaagcaatgtctcaa |
| Rat                    | agcaaagcaatgtctcaa |

## Figure 2

A

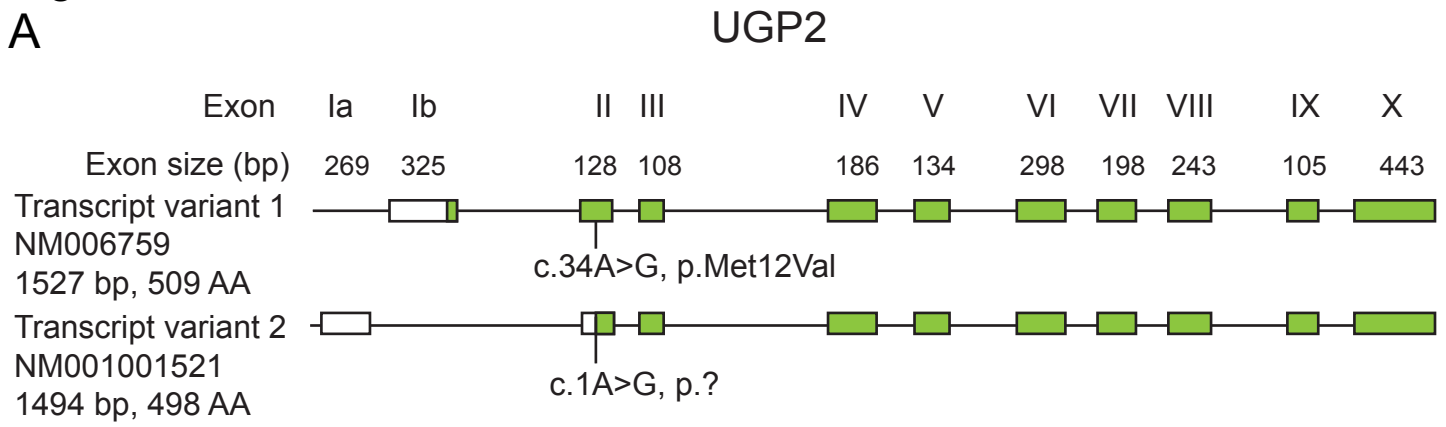

B

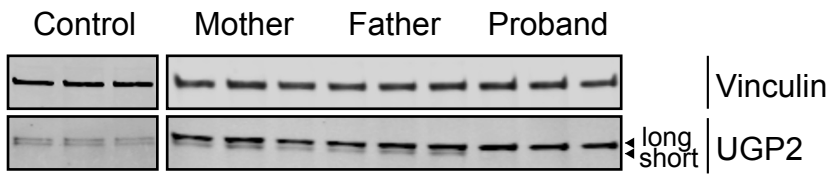

C

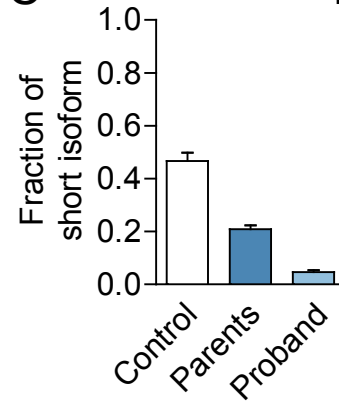

D

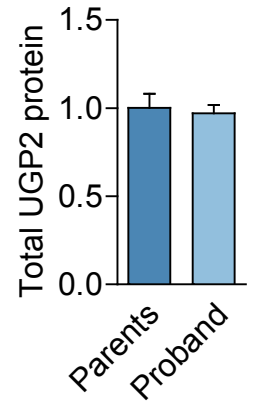

E

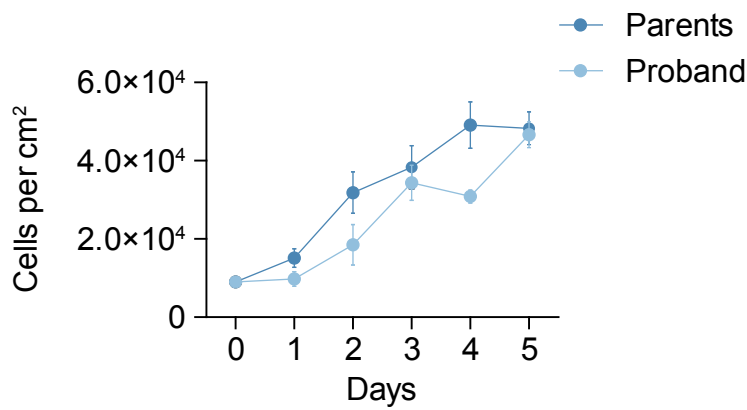

G

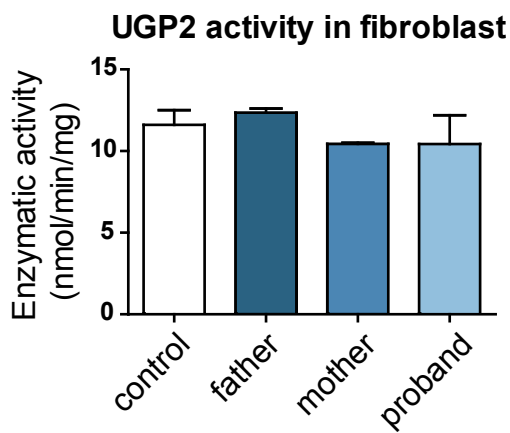

F

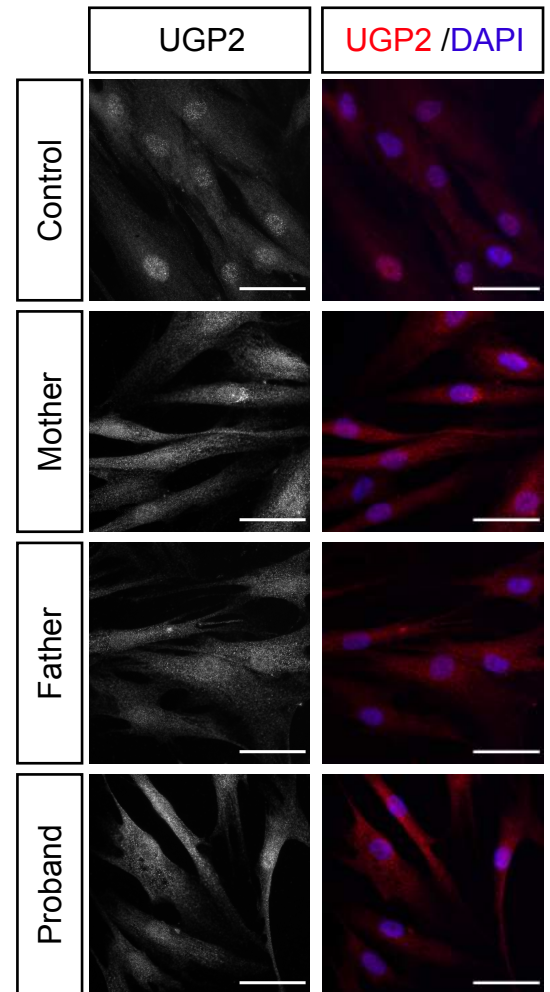

## Figure 3

**A**

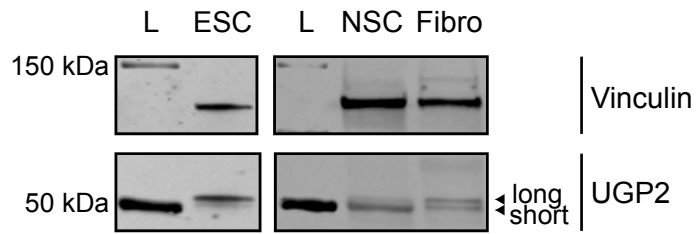

**C**

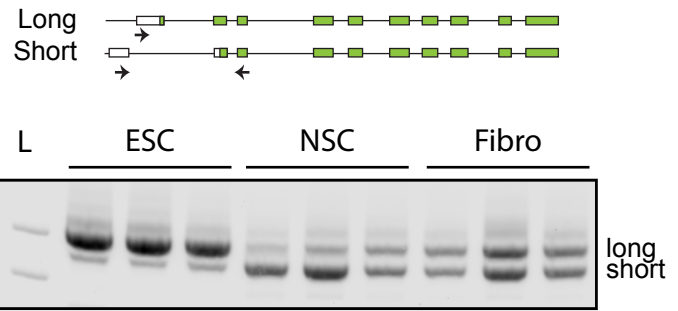

**B**

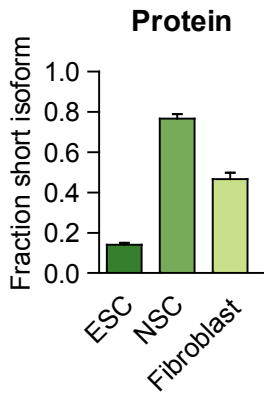

**D**

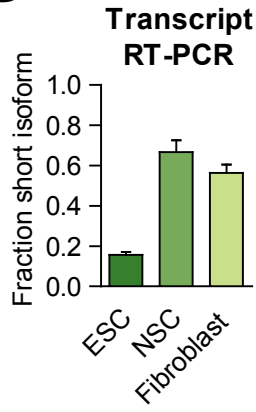

**E**

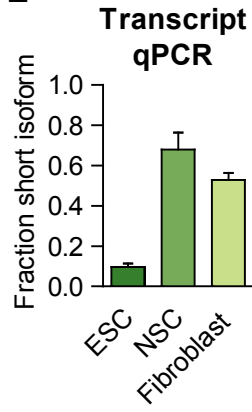

**F**

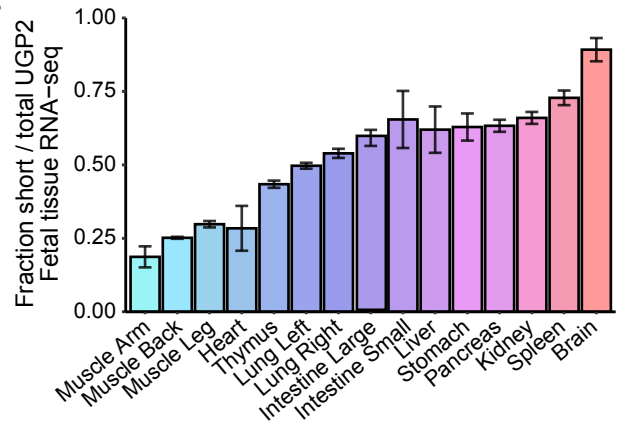

**G**

**A) first trimester**

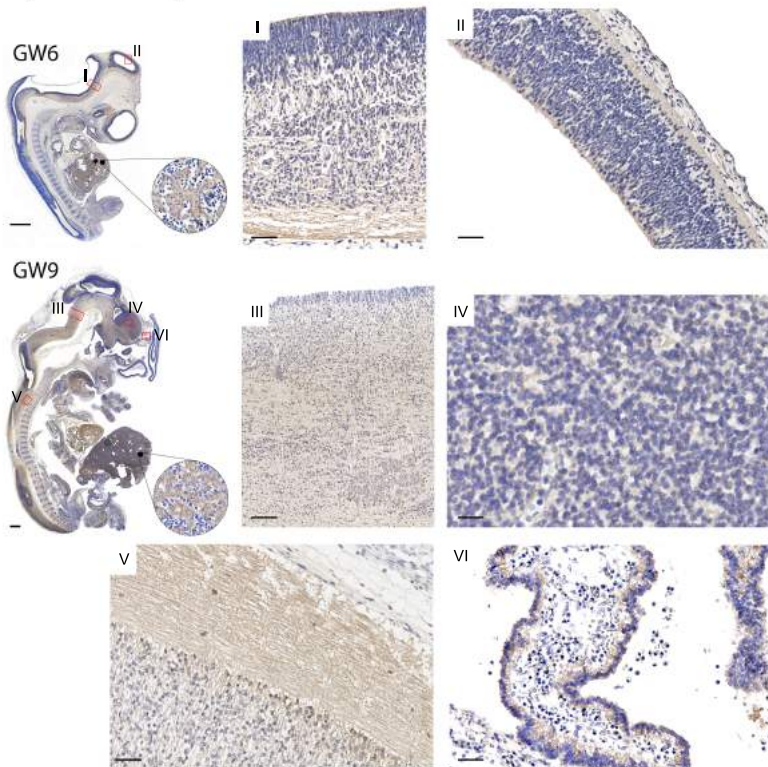

**B) second trimester GW23 C) third trimester GW36**

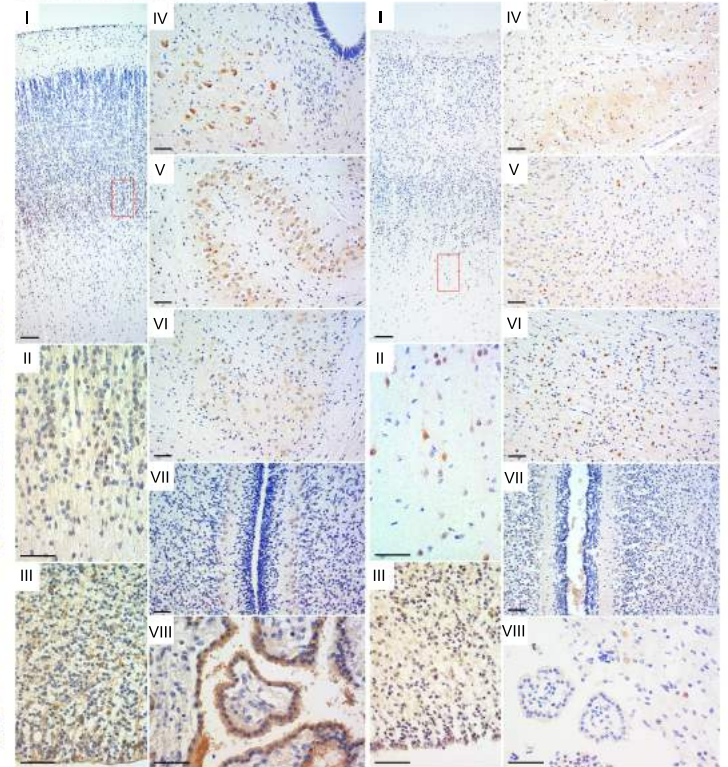

**H**

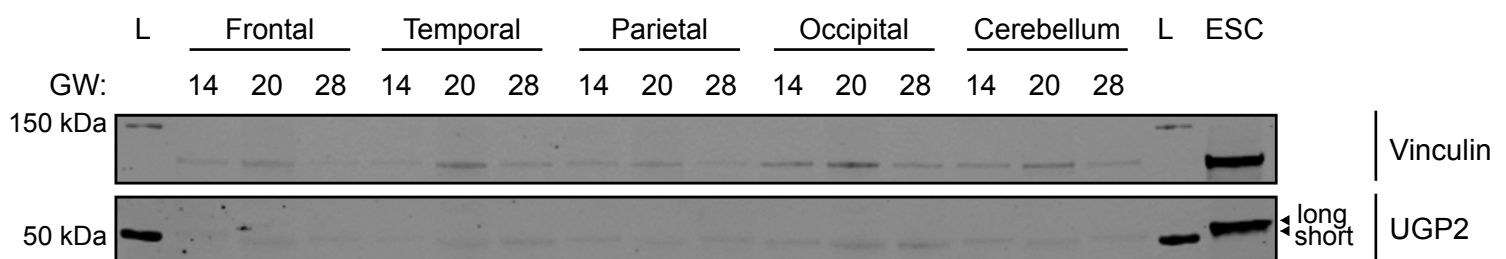

## Figure 4

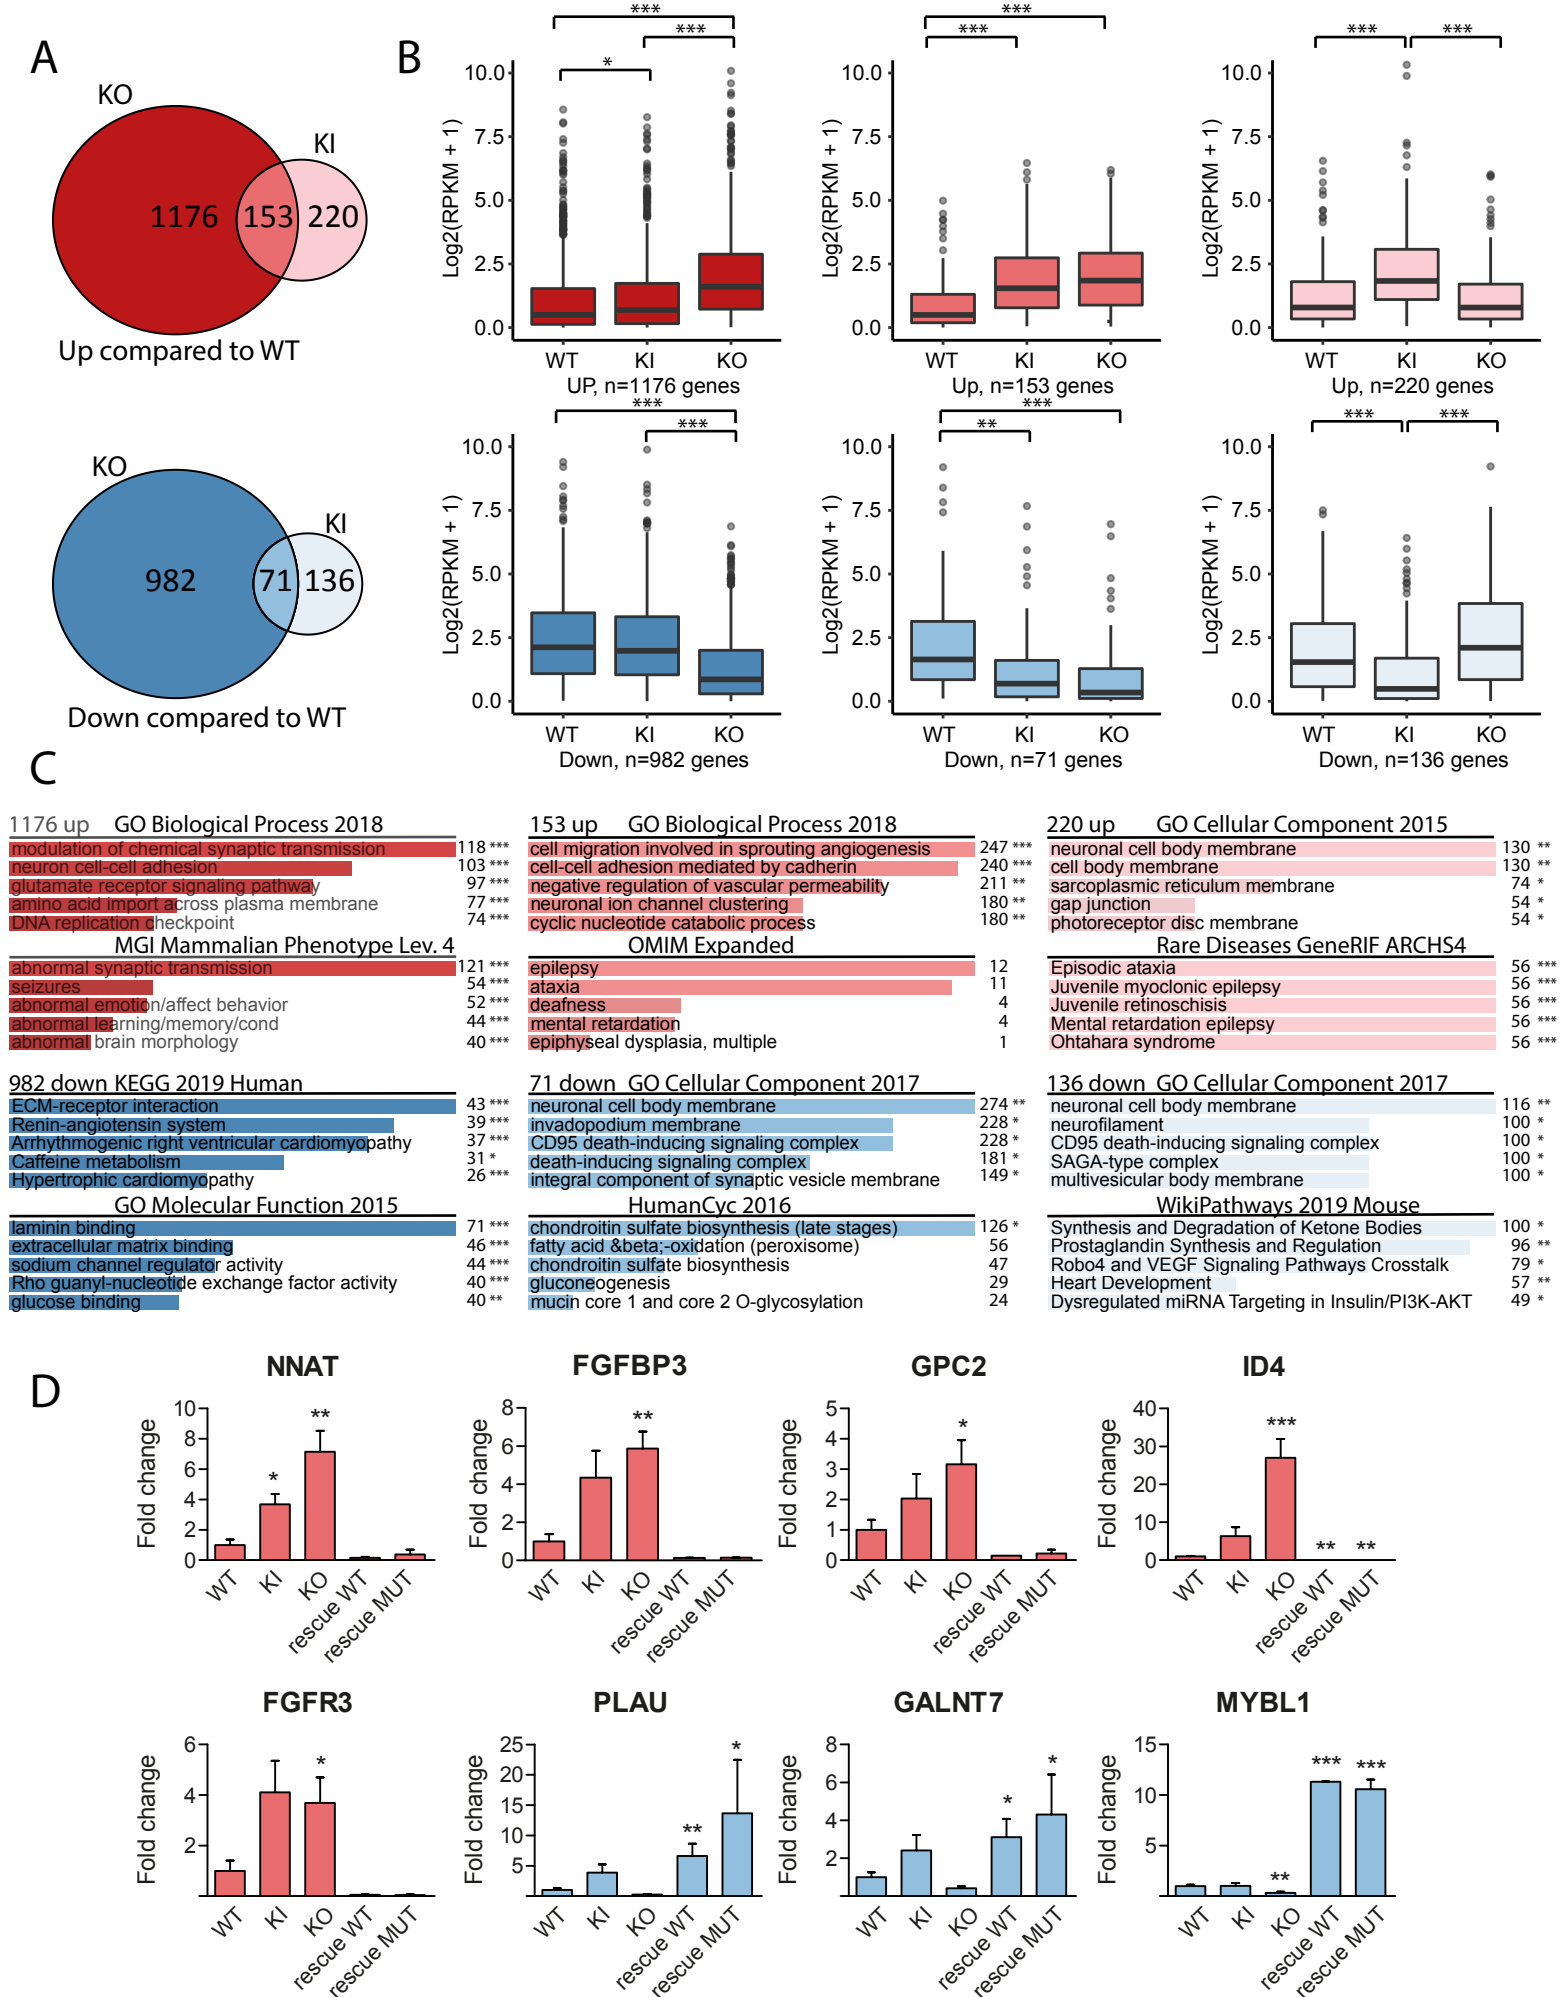



## Figure 5

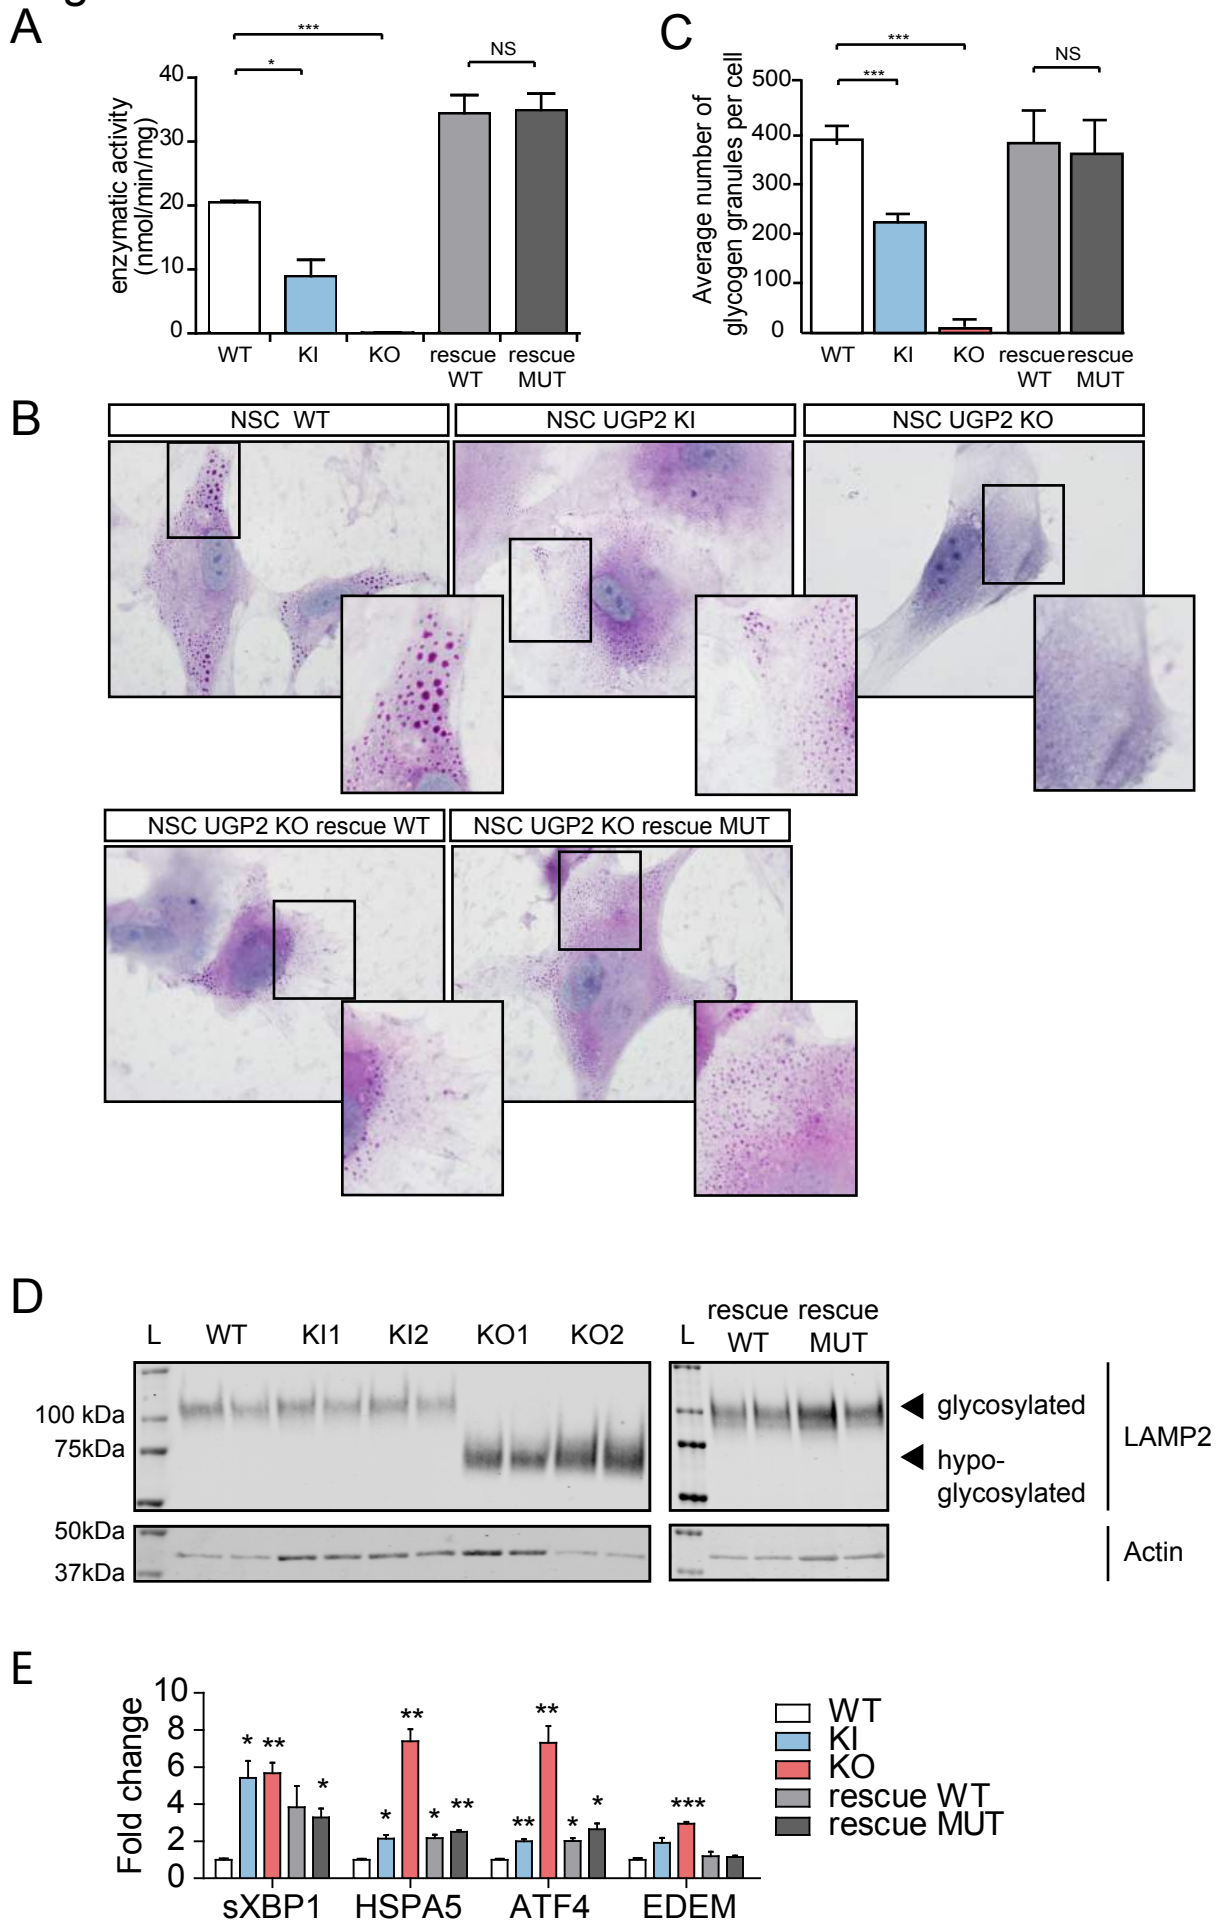

## Figure 6

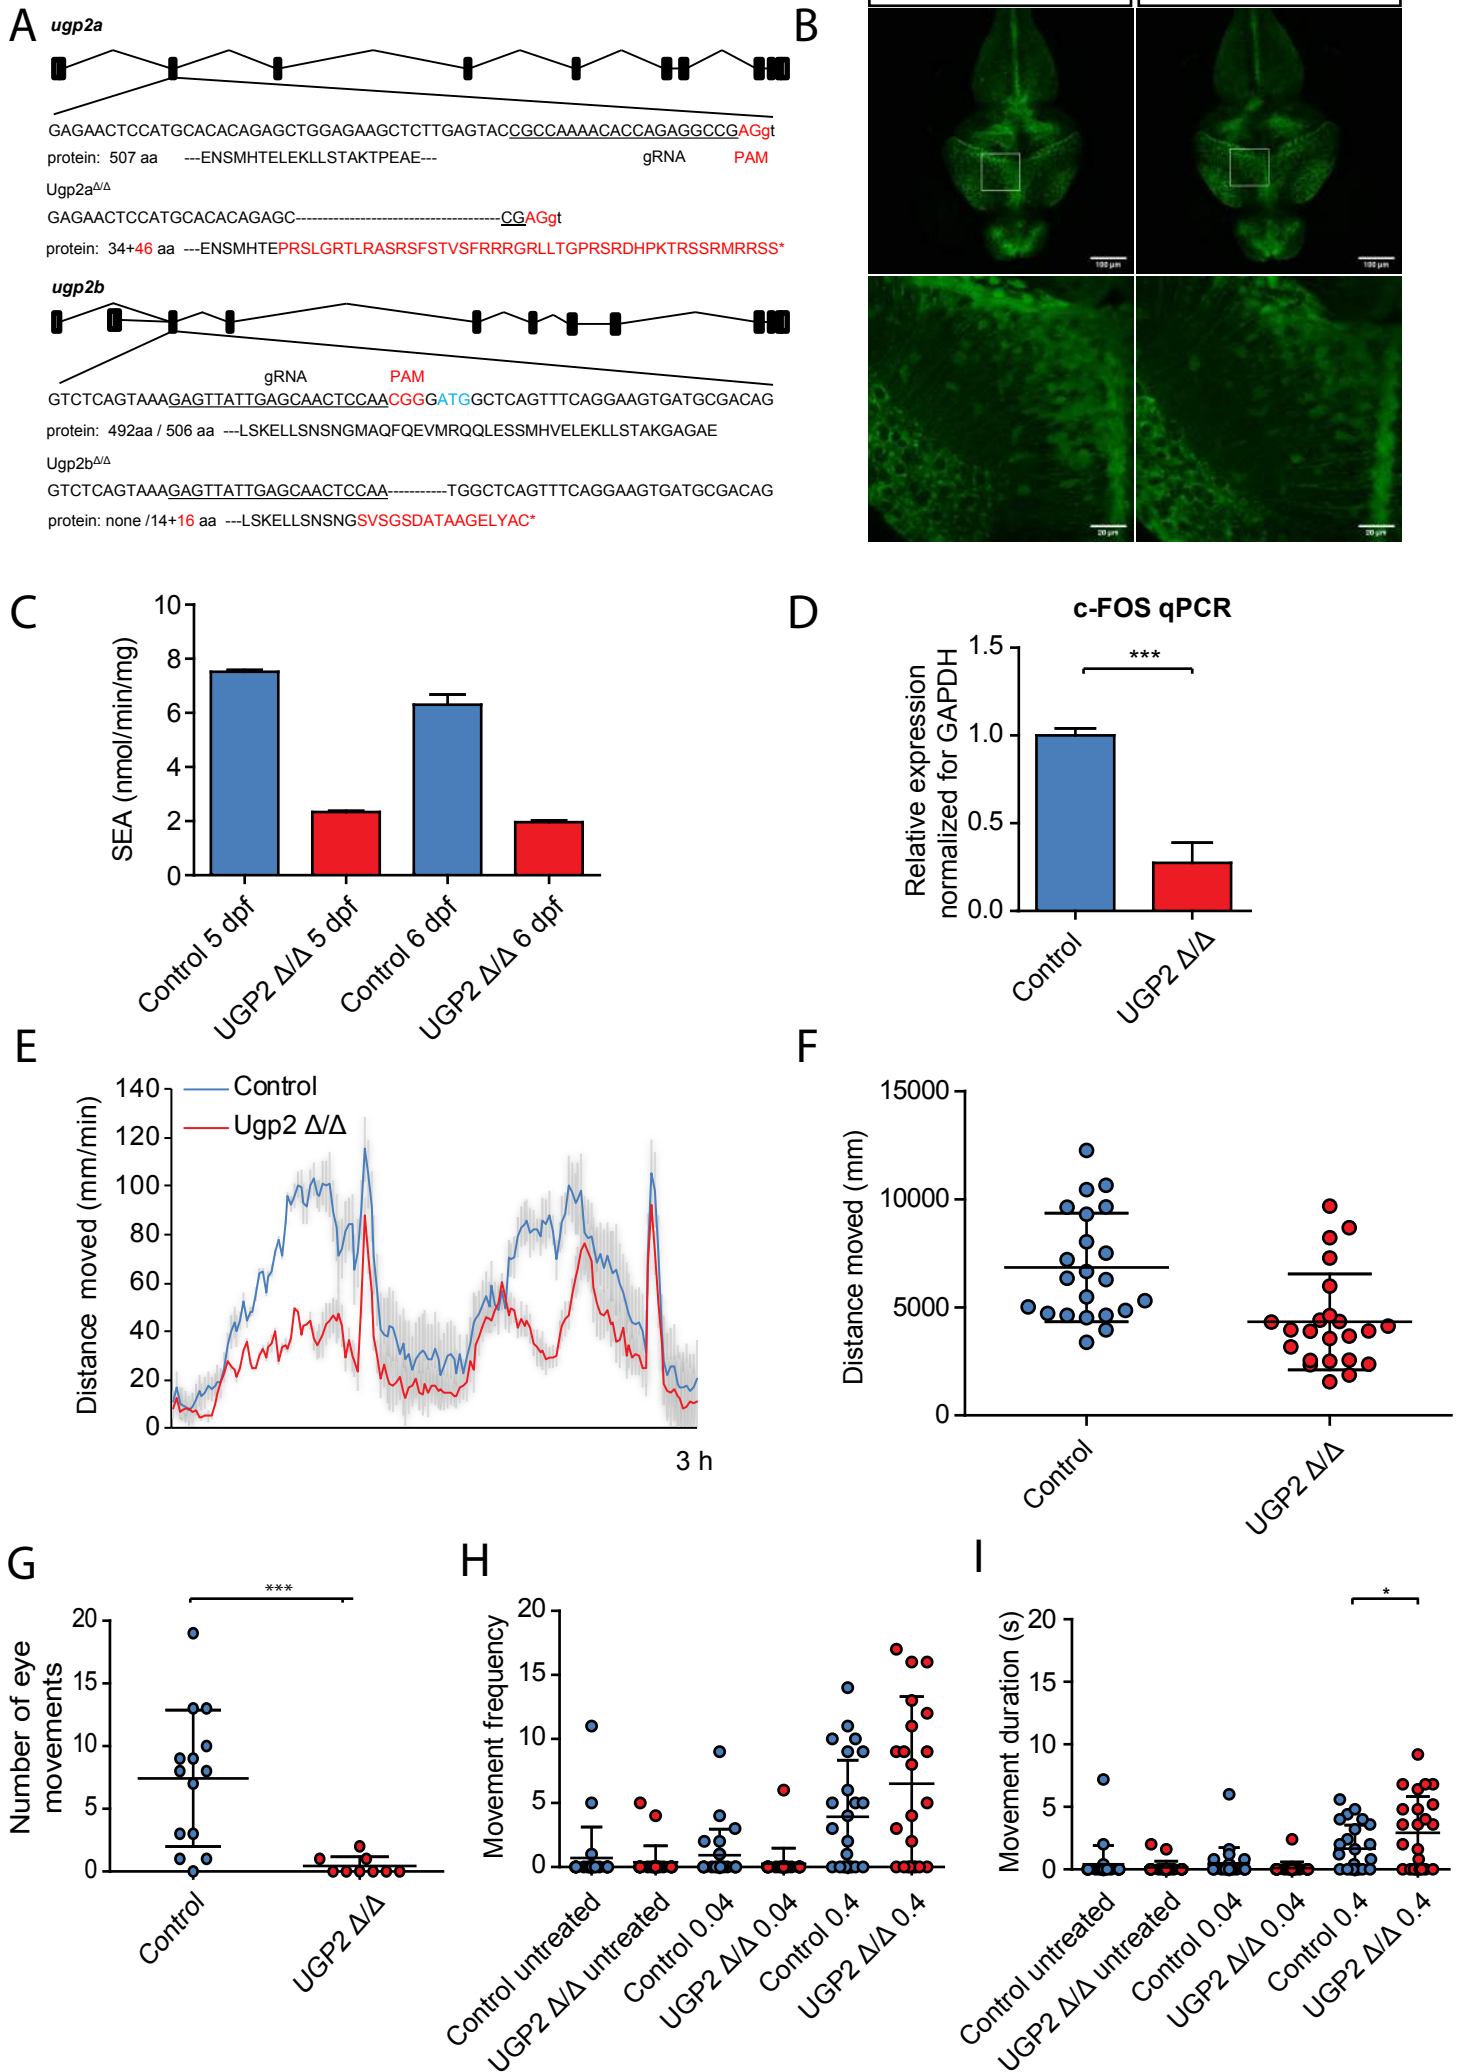

# Figure 7

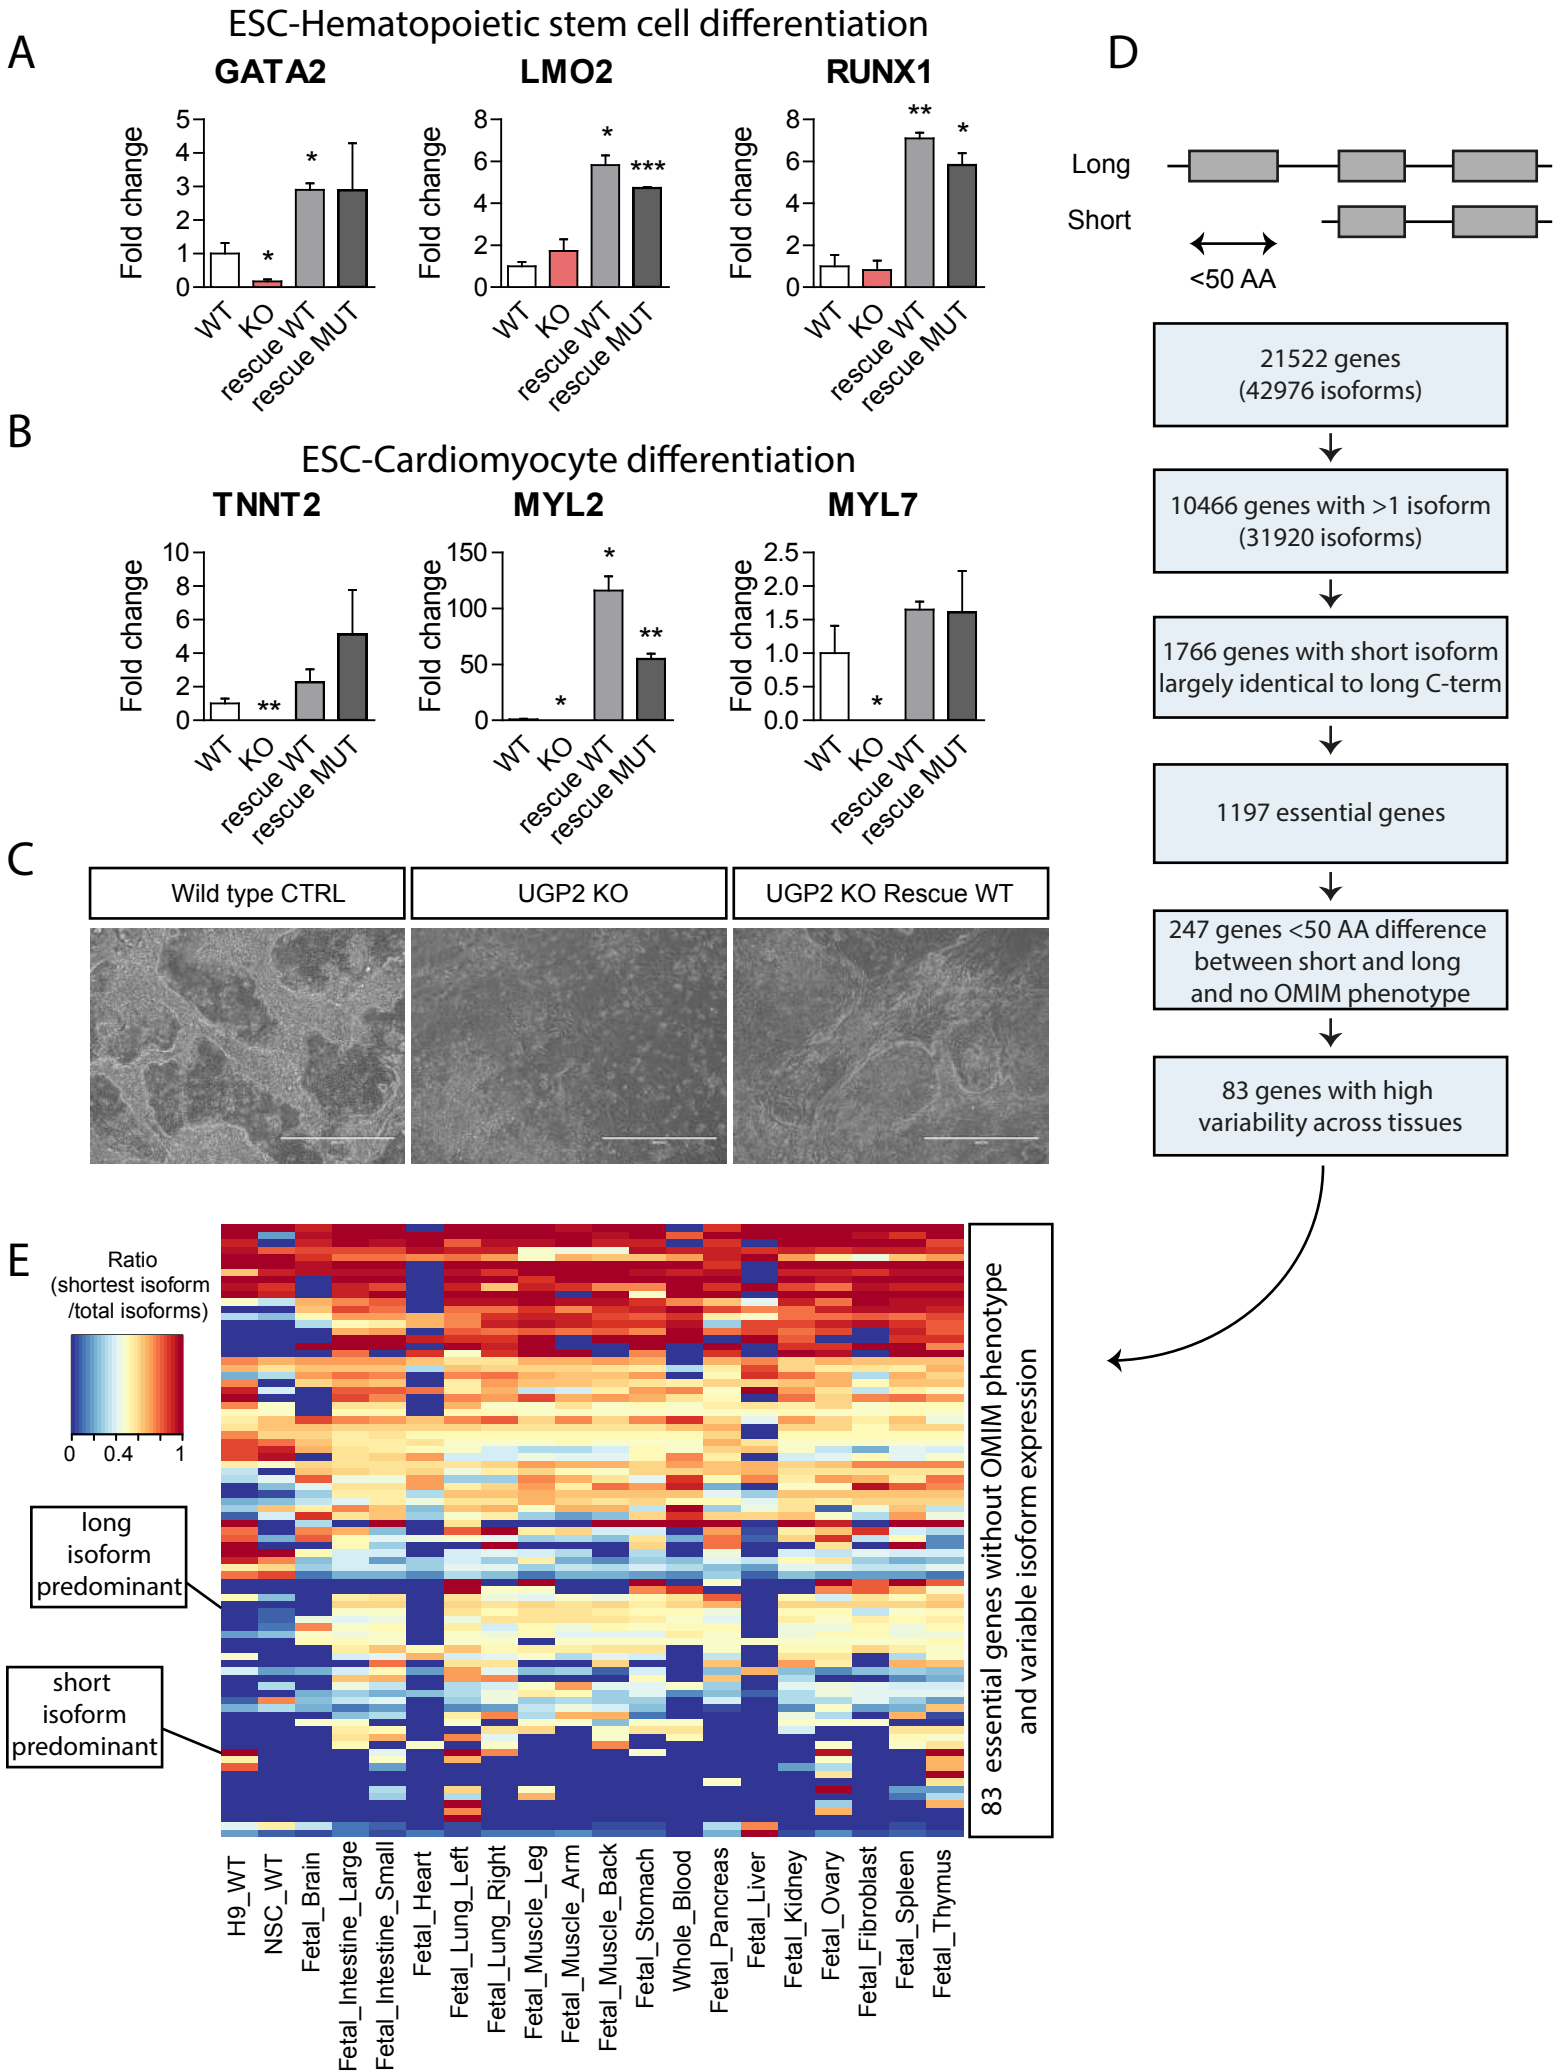

## Supplementary Figure 1

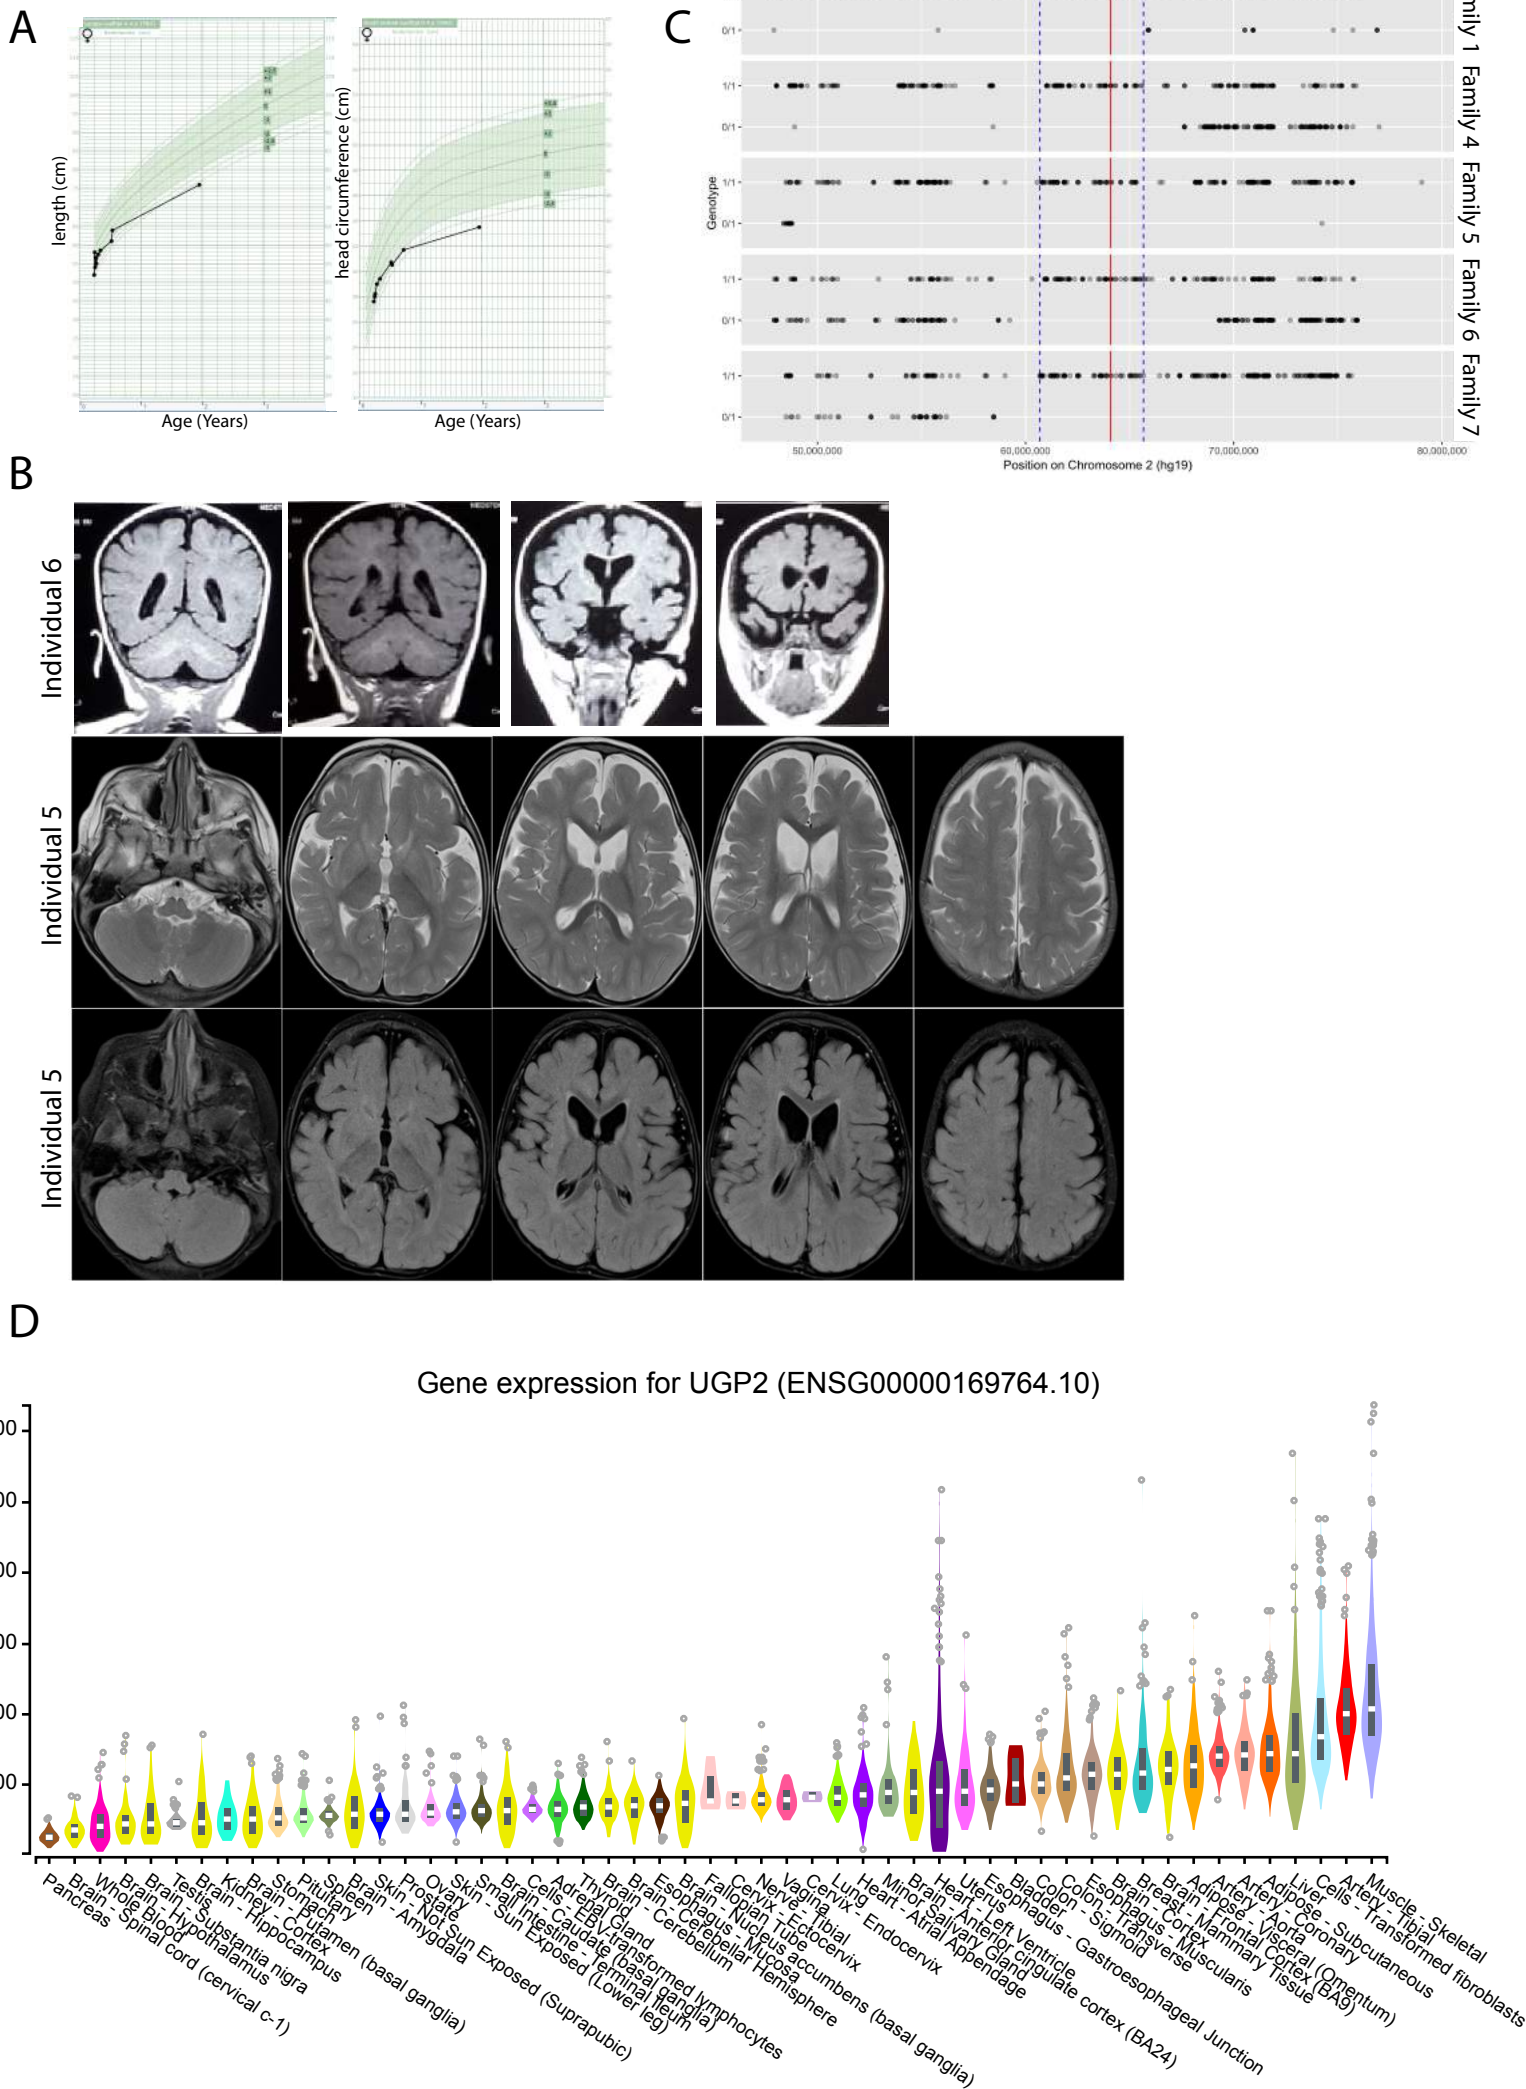

## Supplementary Figure 2

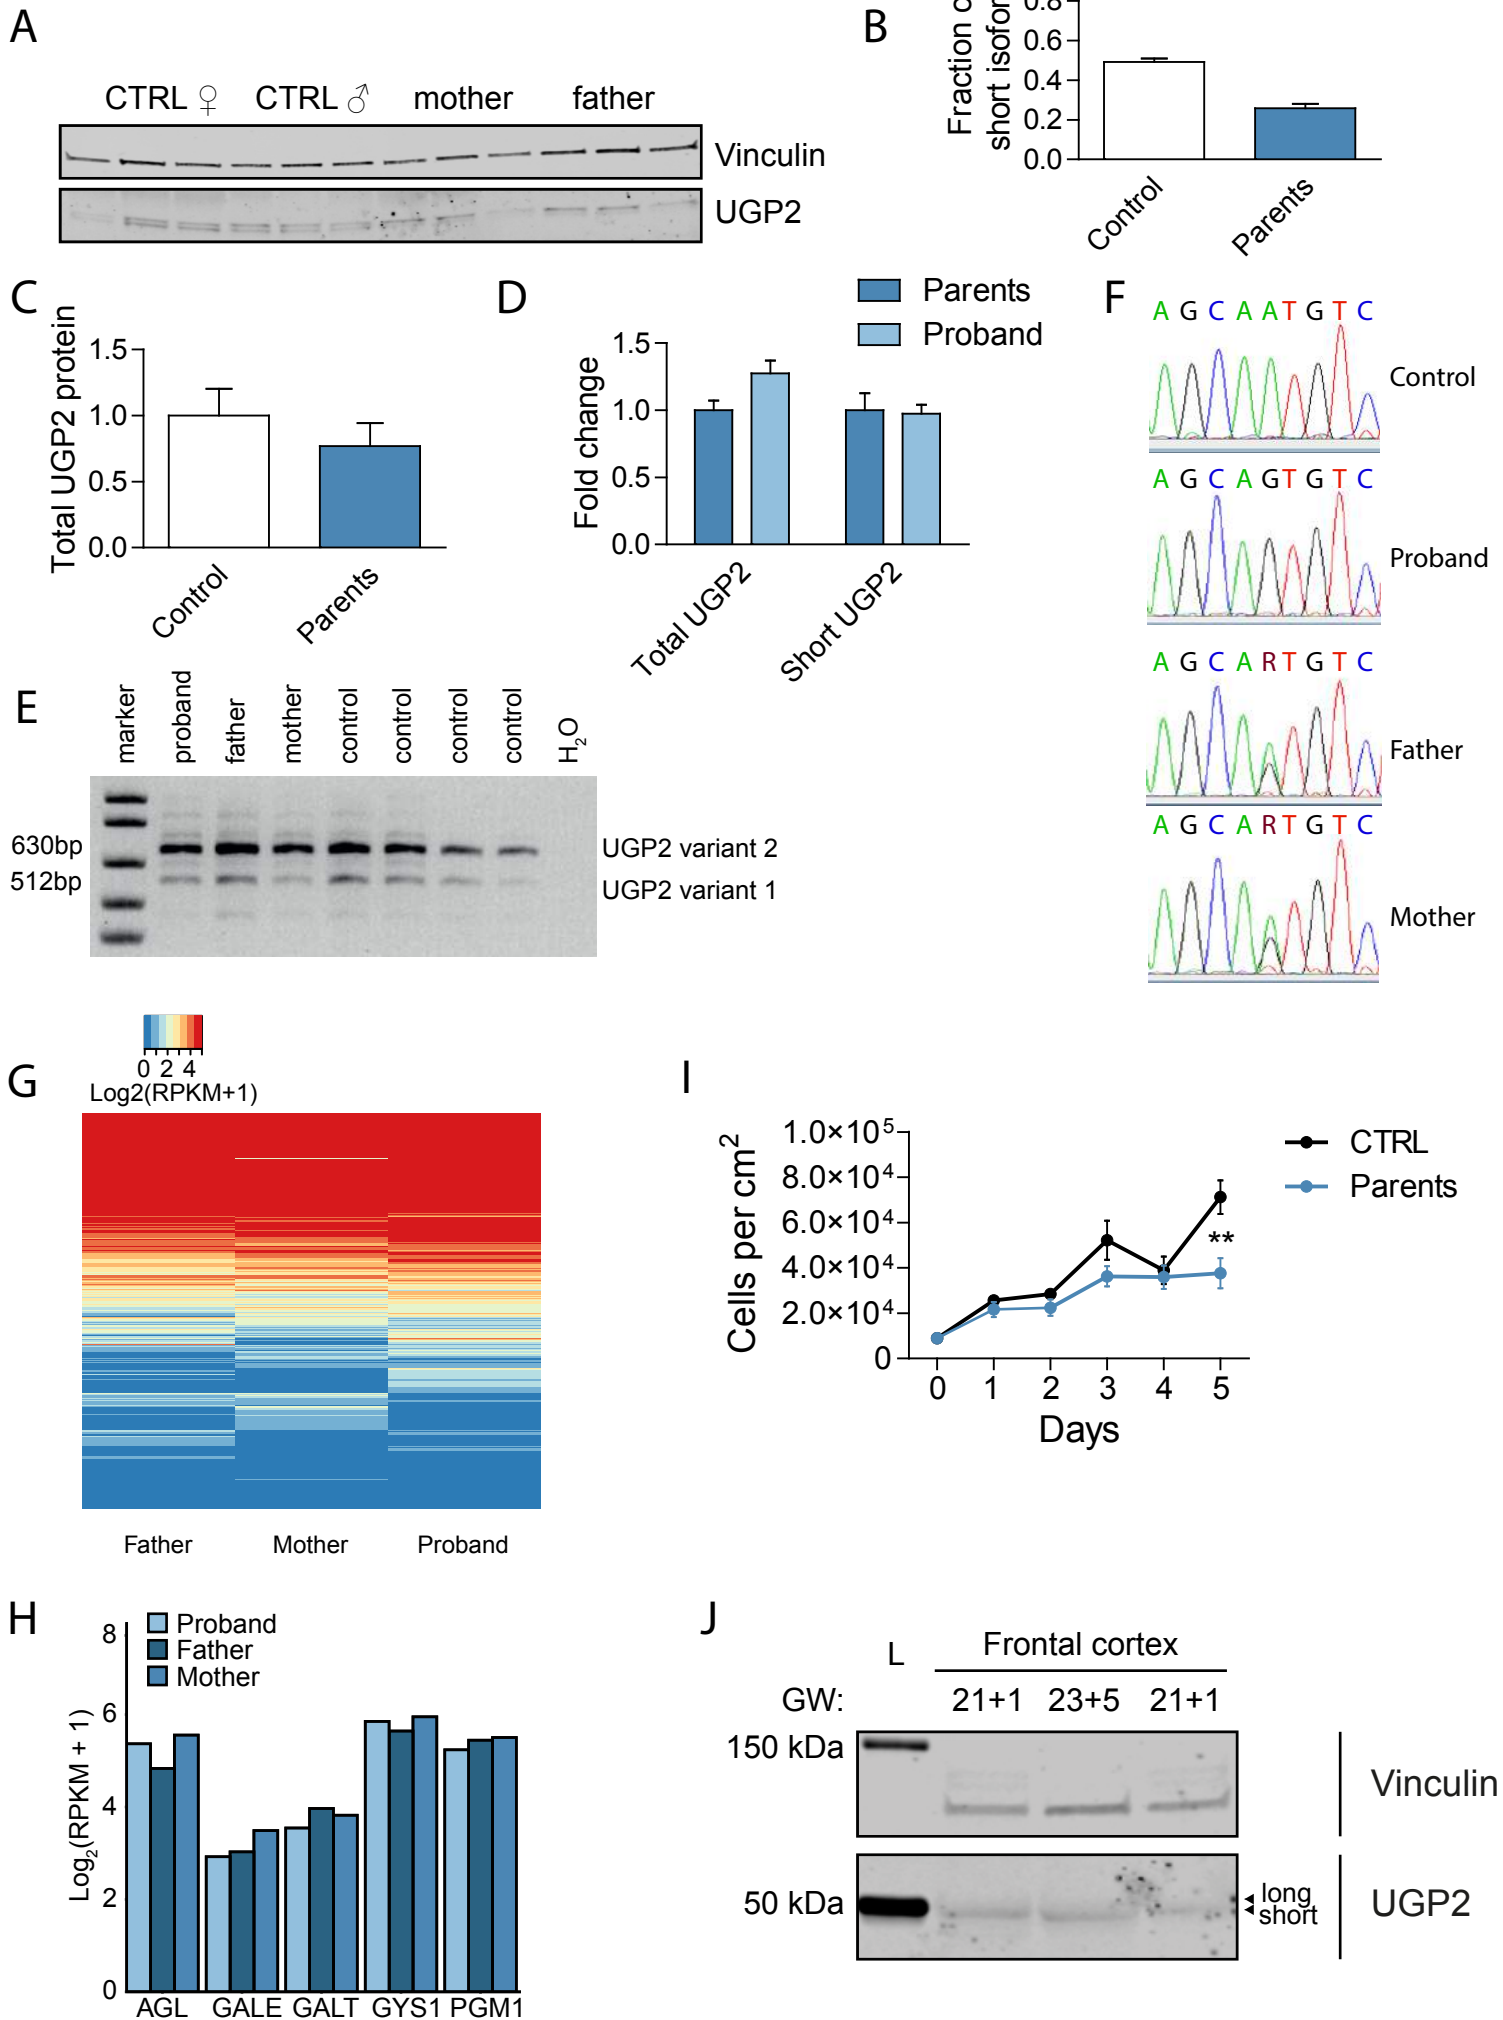

## Supplementary Figure 3

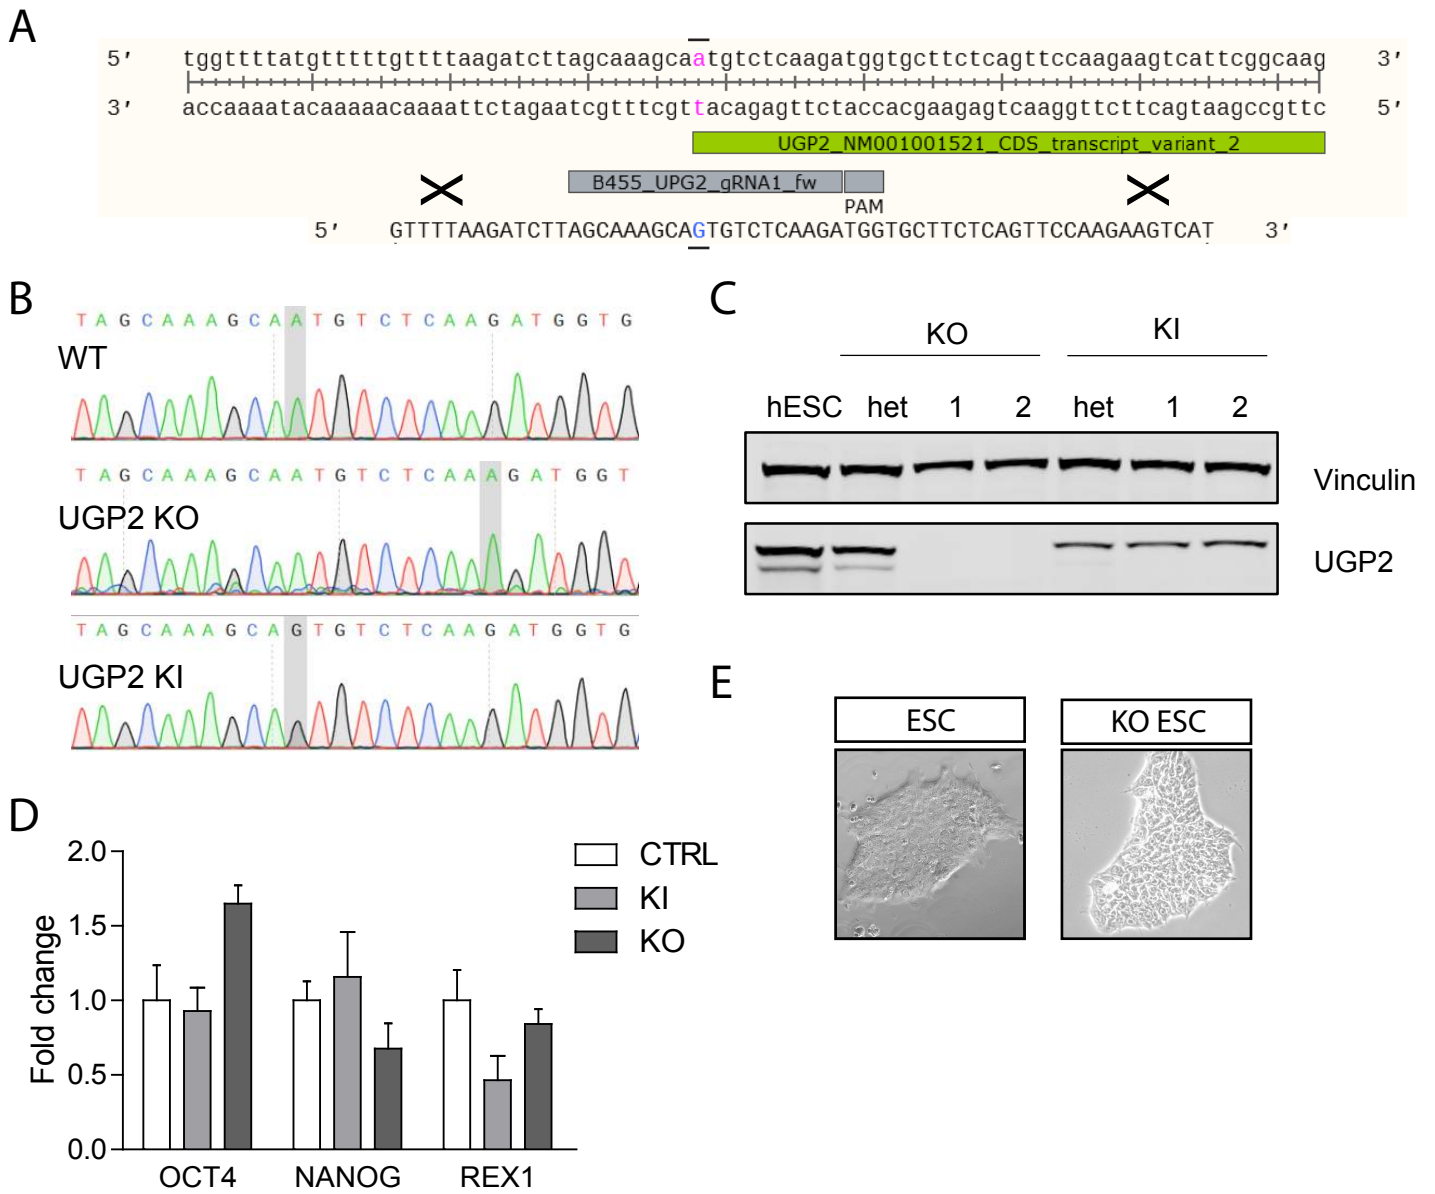

## Supplementary Figure 4

**A**

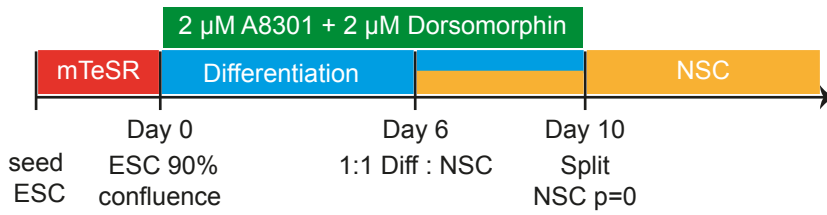

**B**

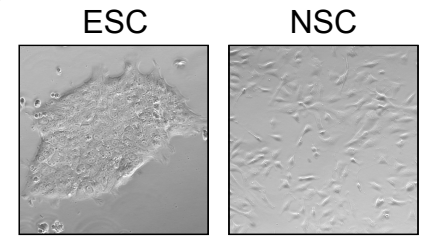

**C**

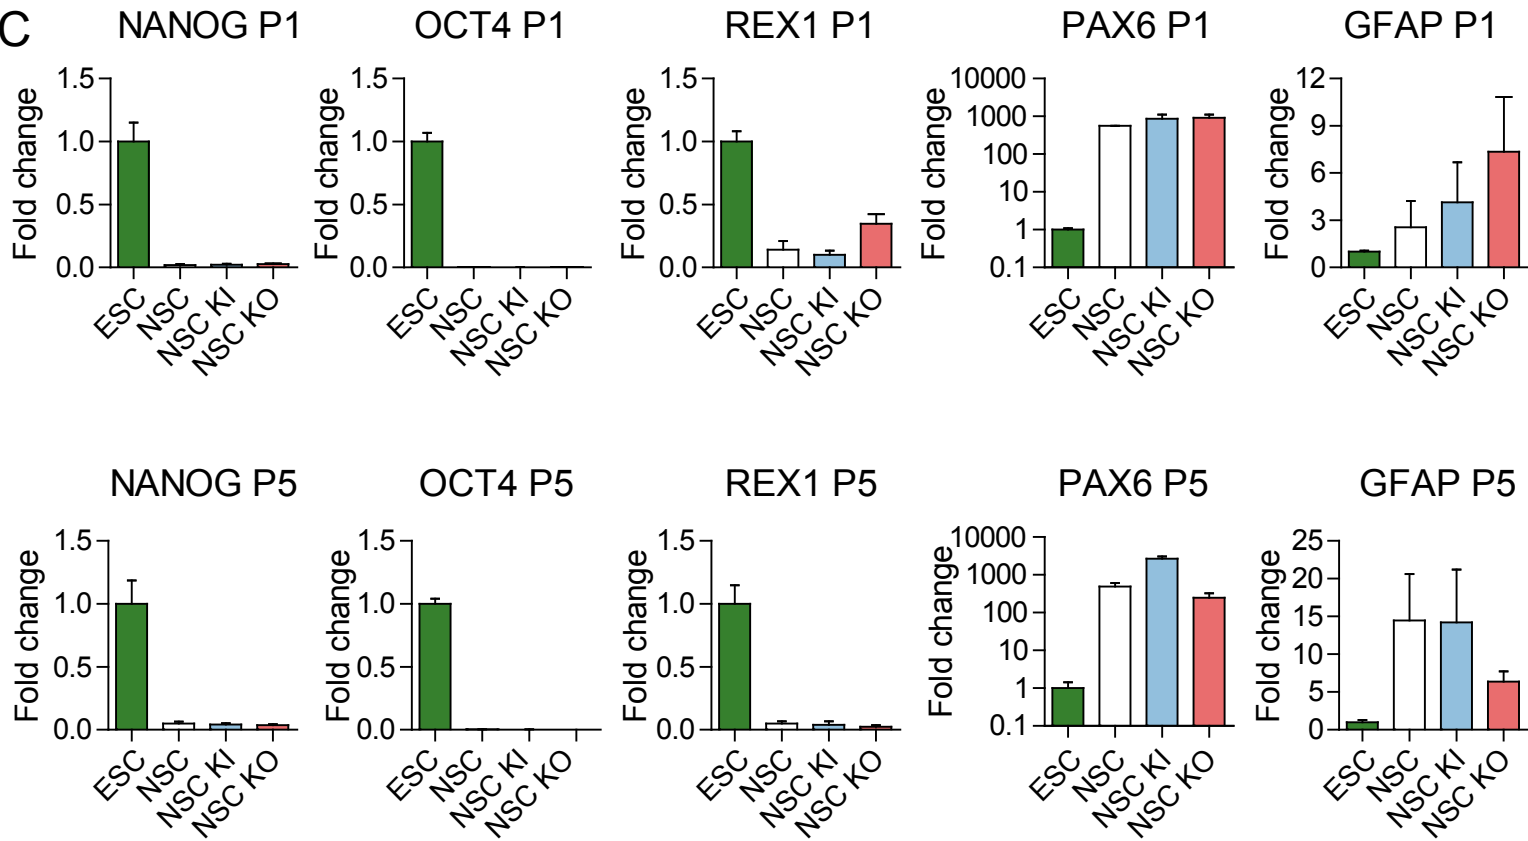

**D**

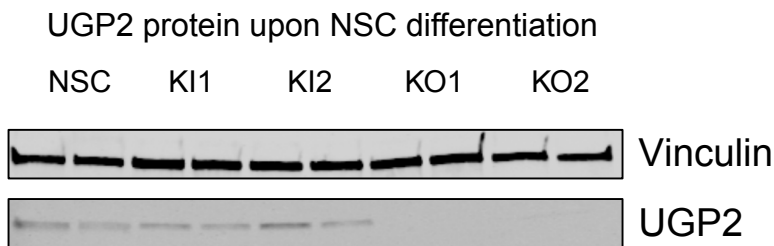

**E**

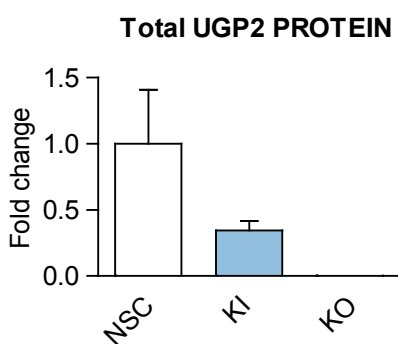

**F**

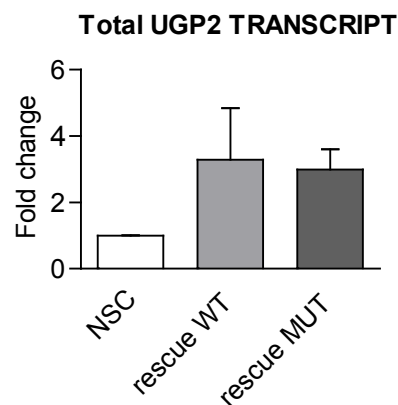

## Supplementary Figure 5

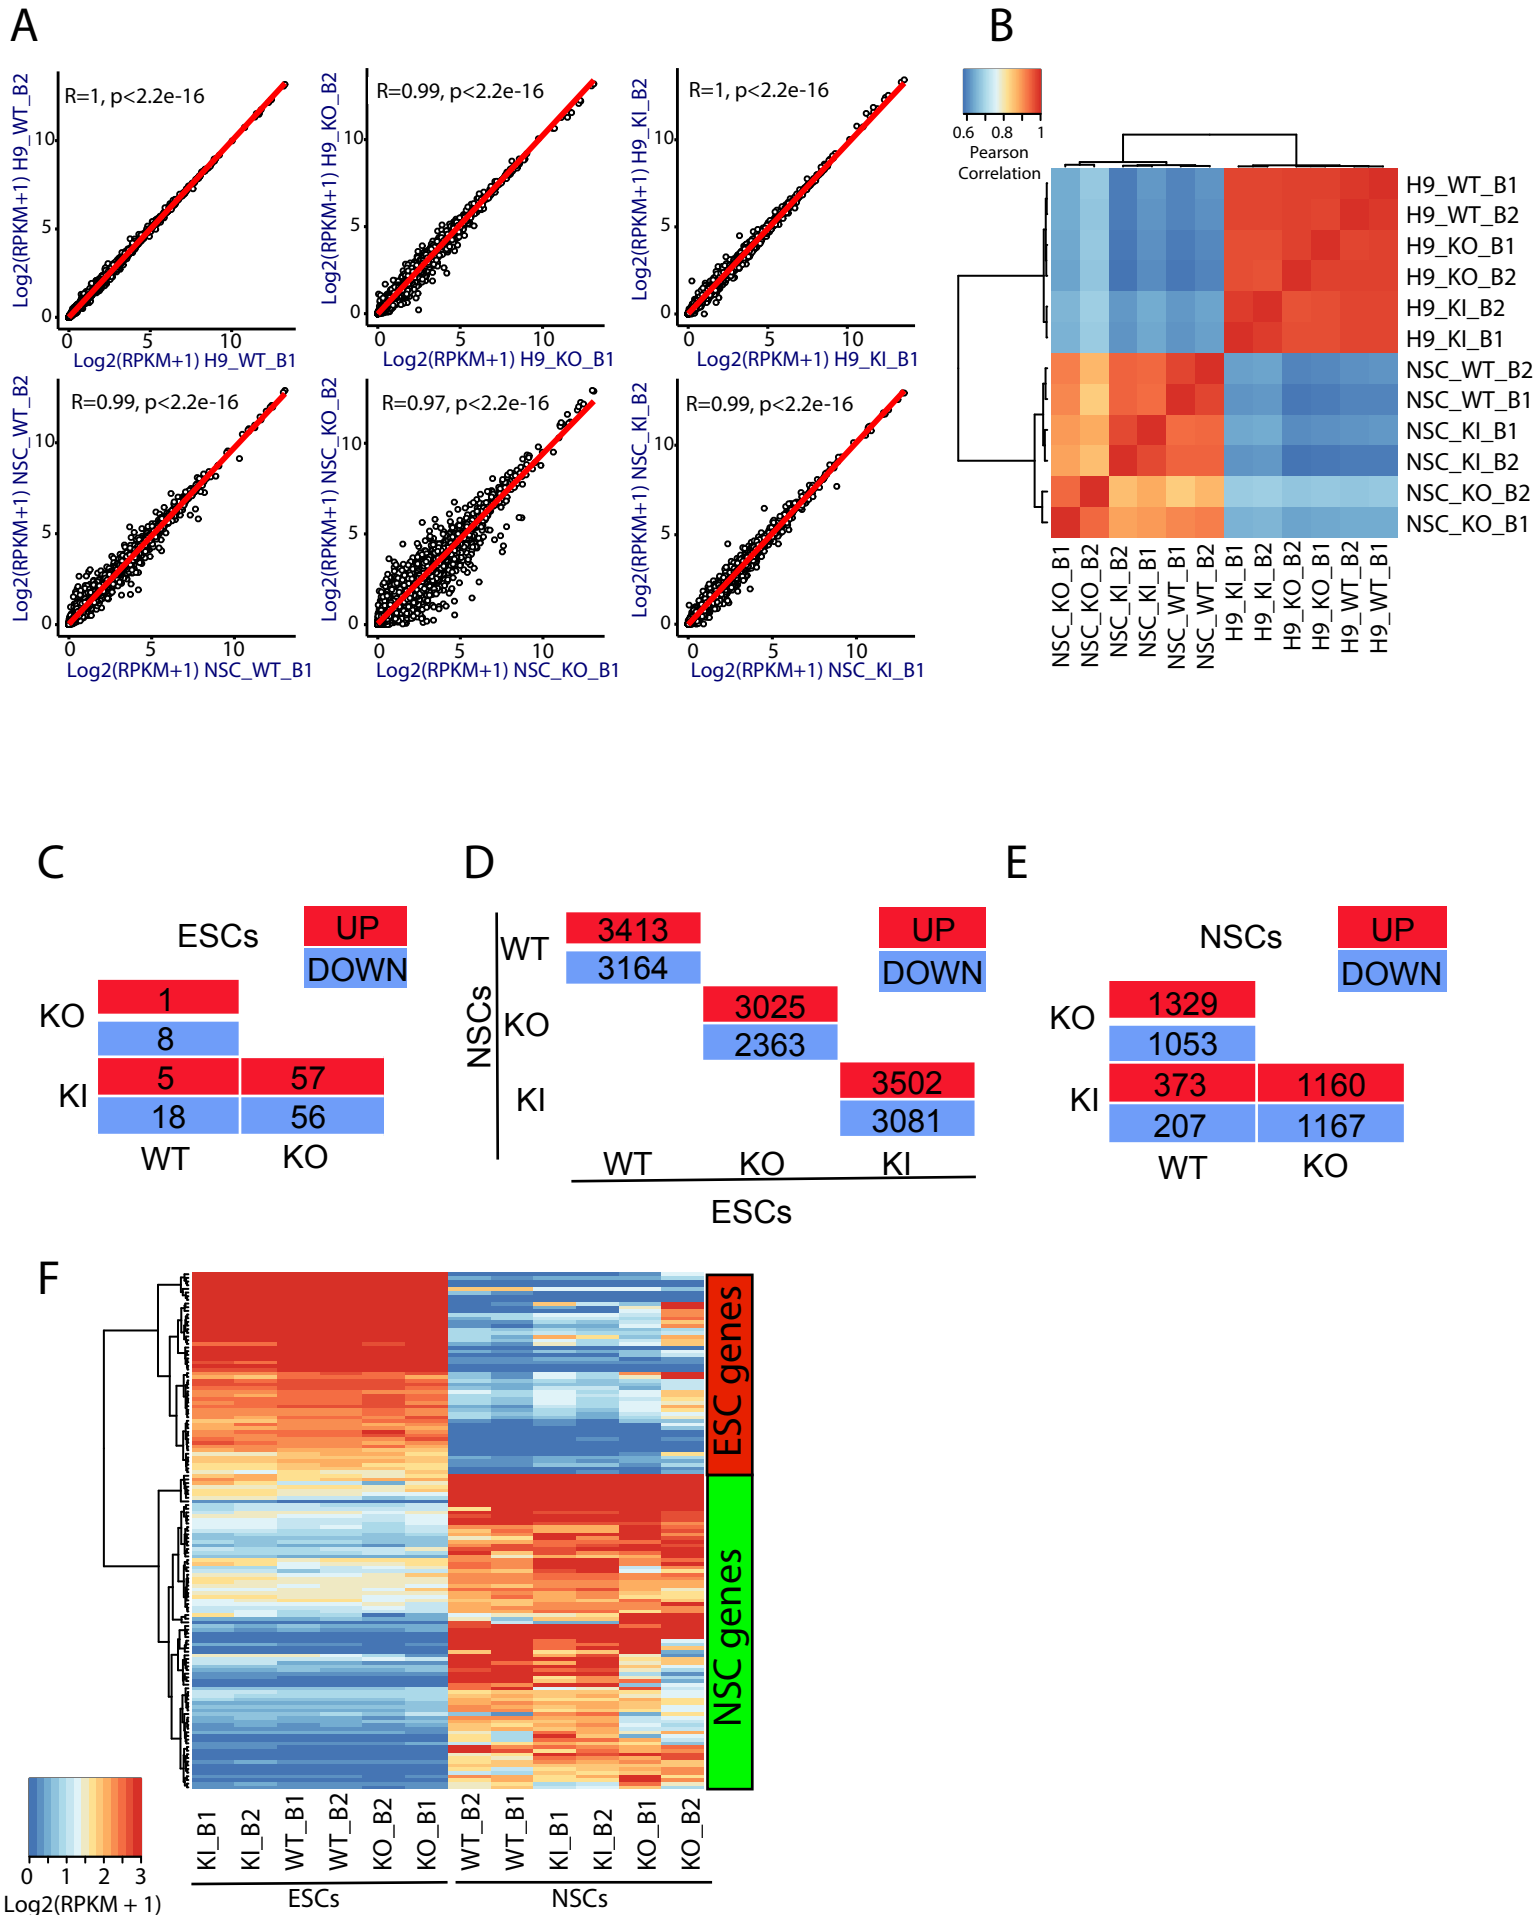



# Supplementary Figure 6

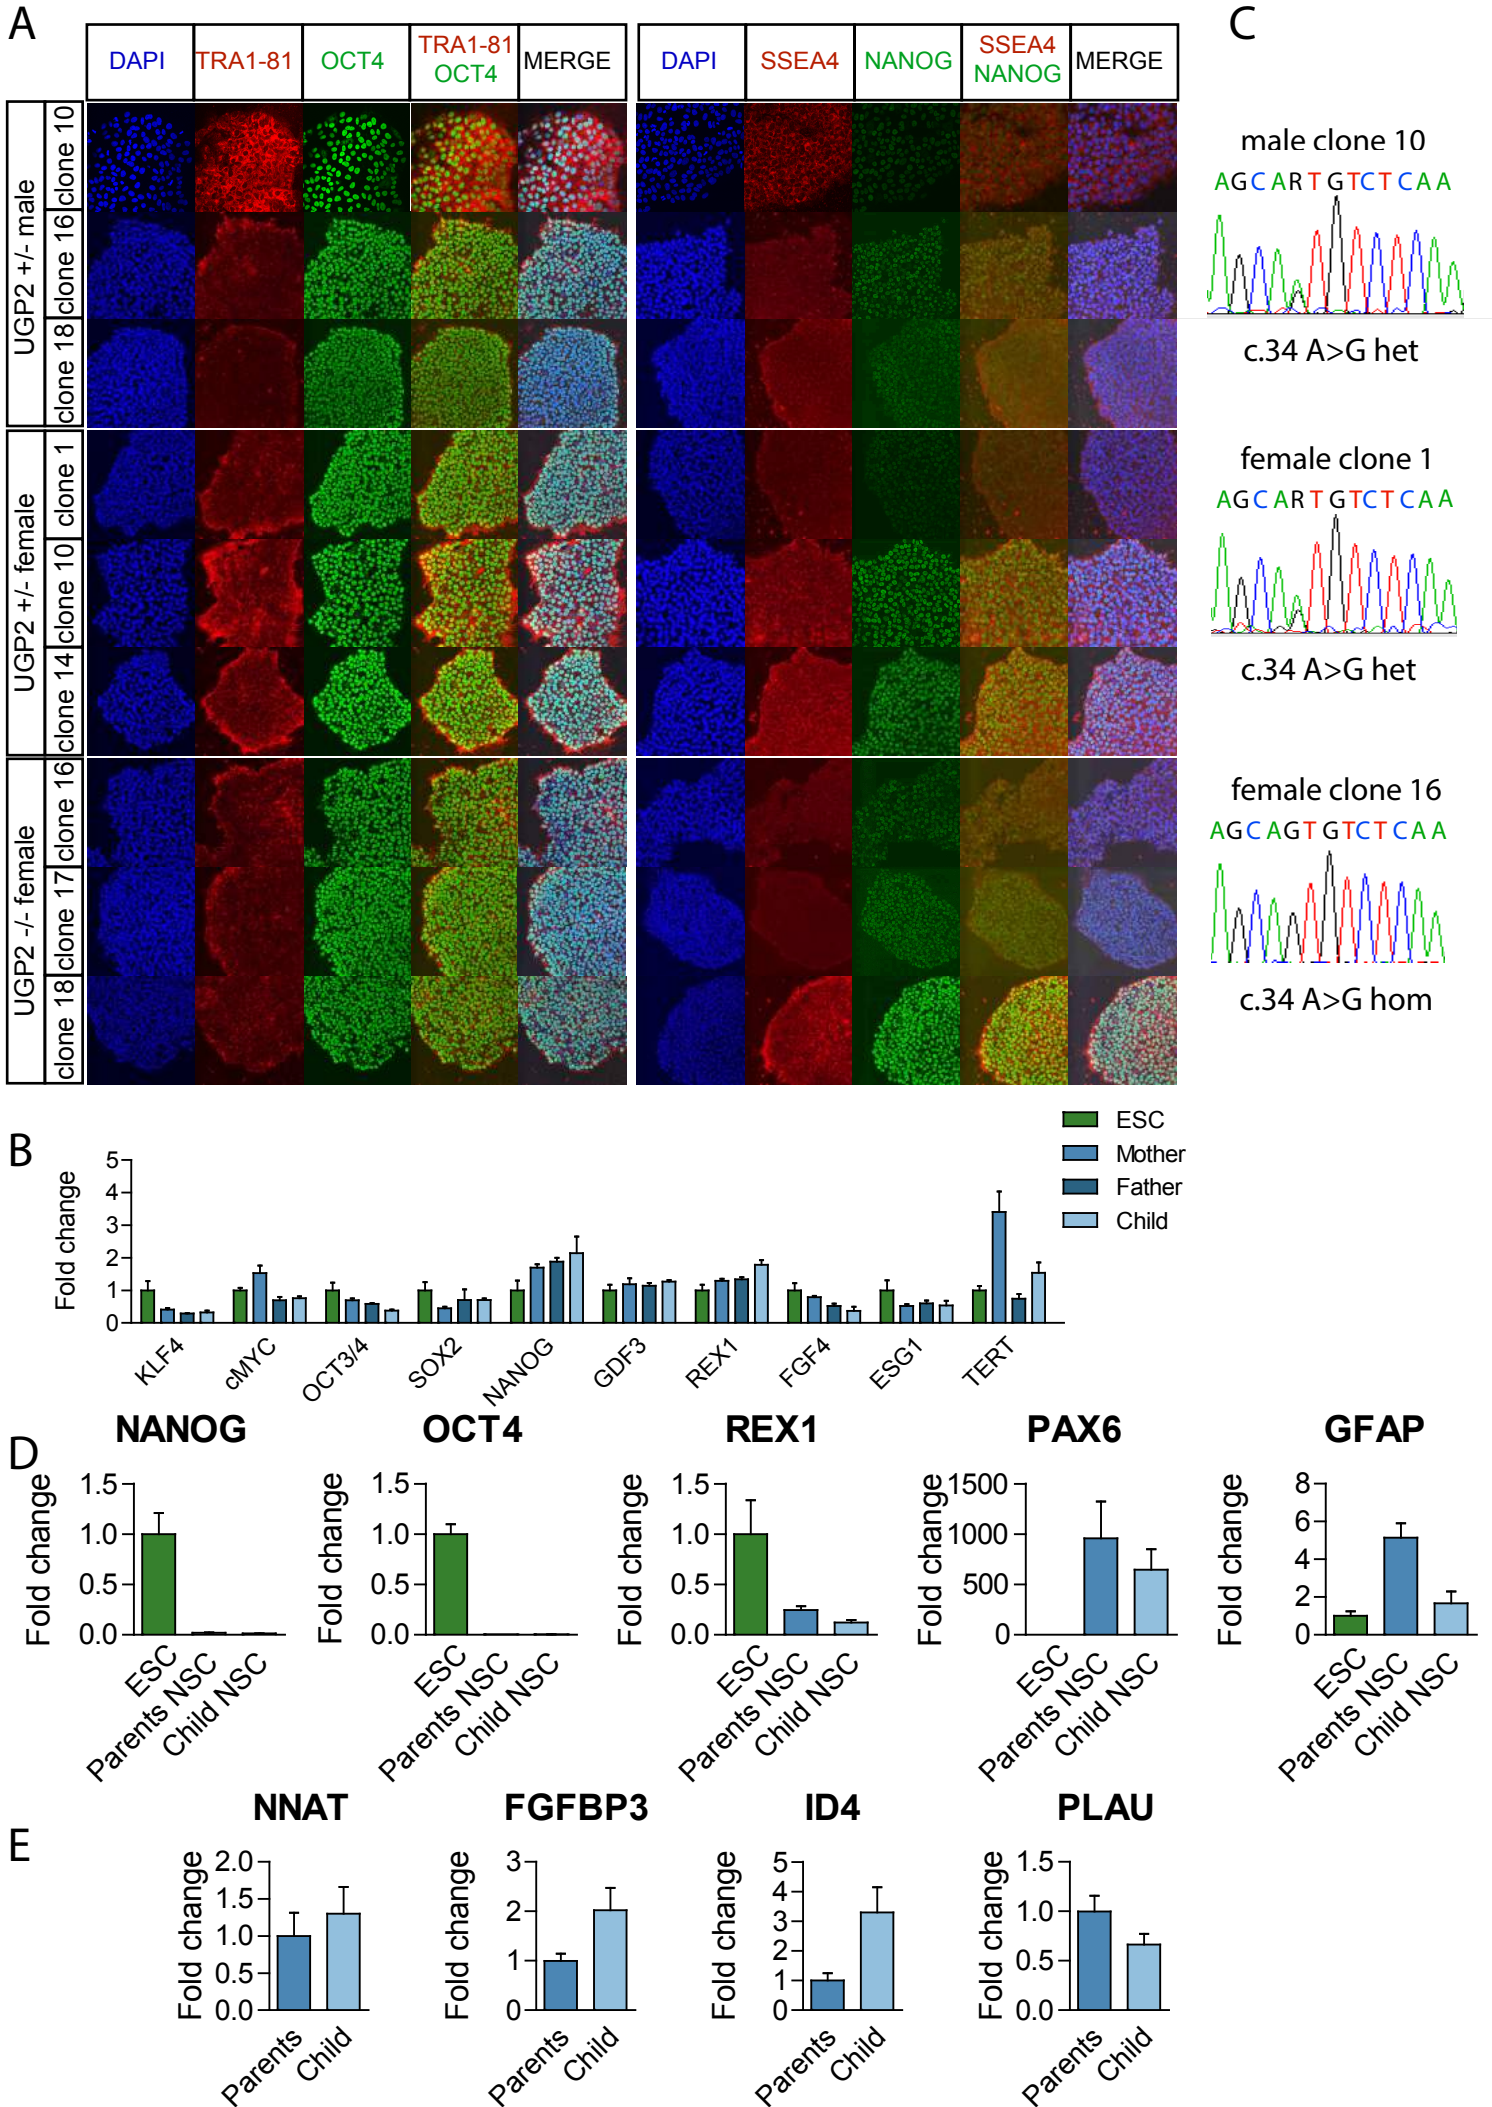

## Supplementary Figure 7

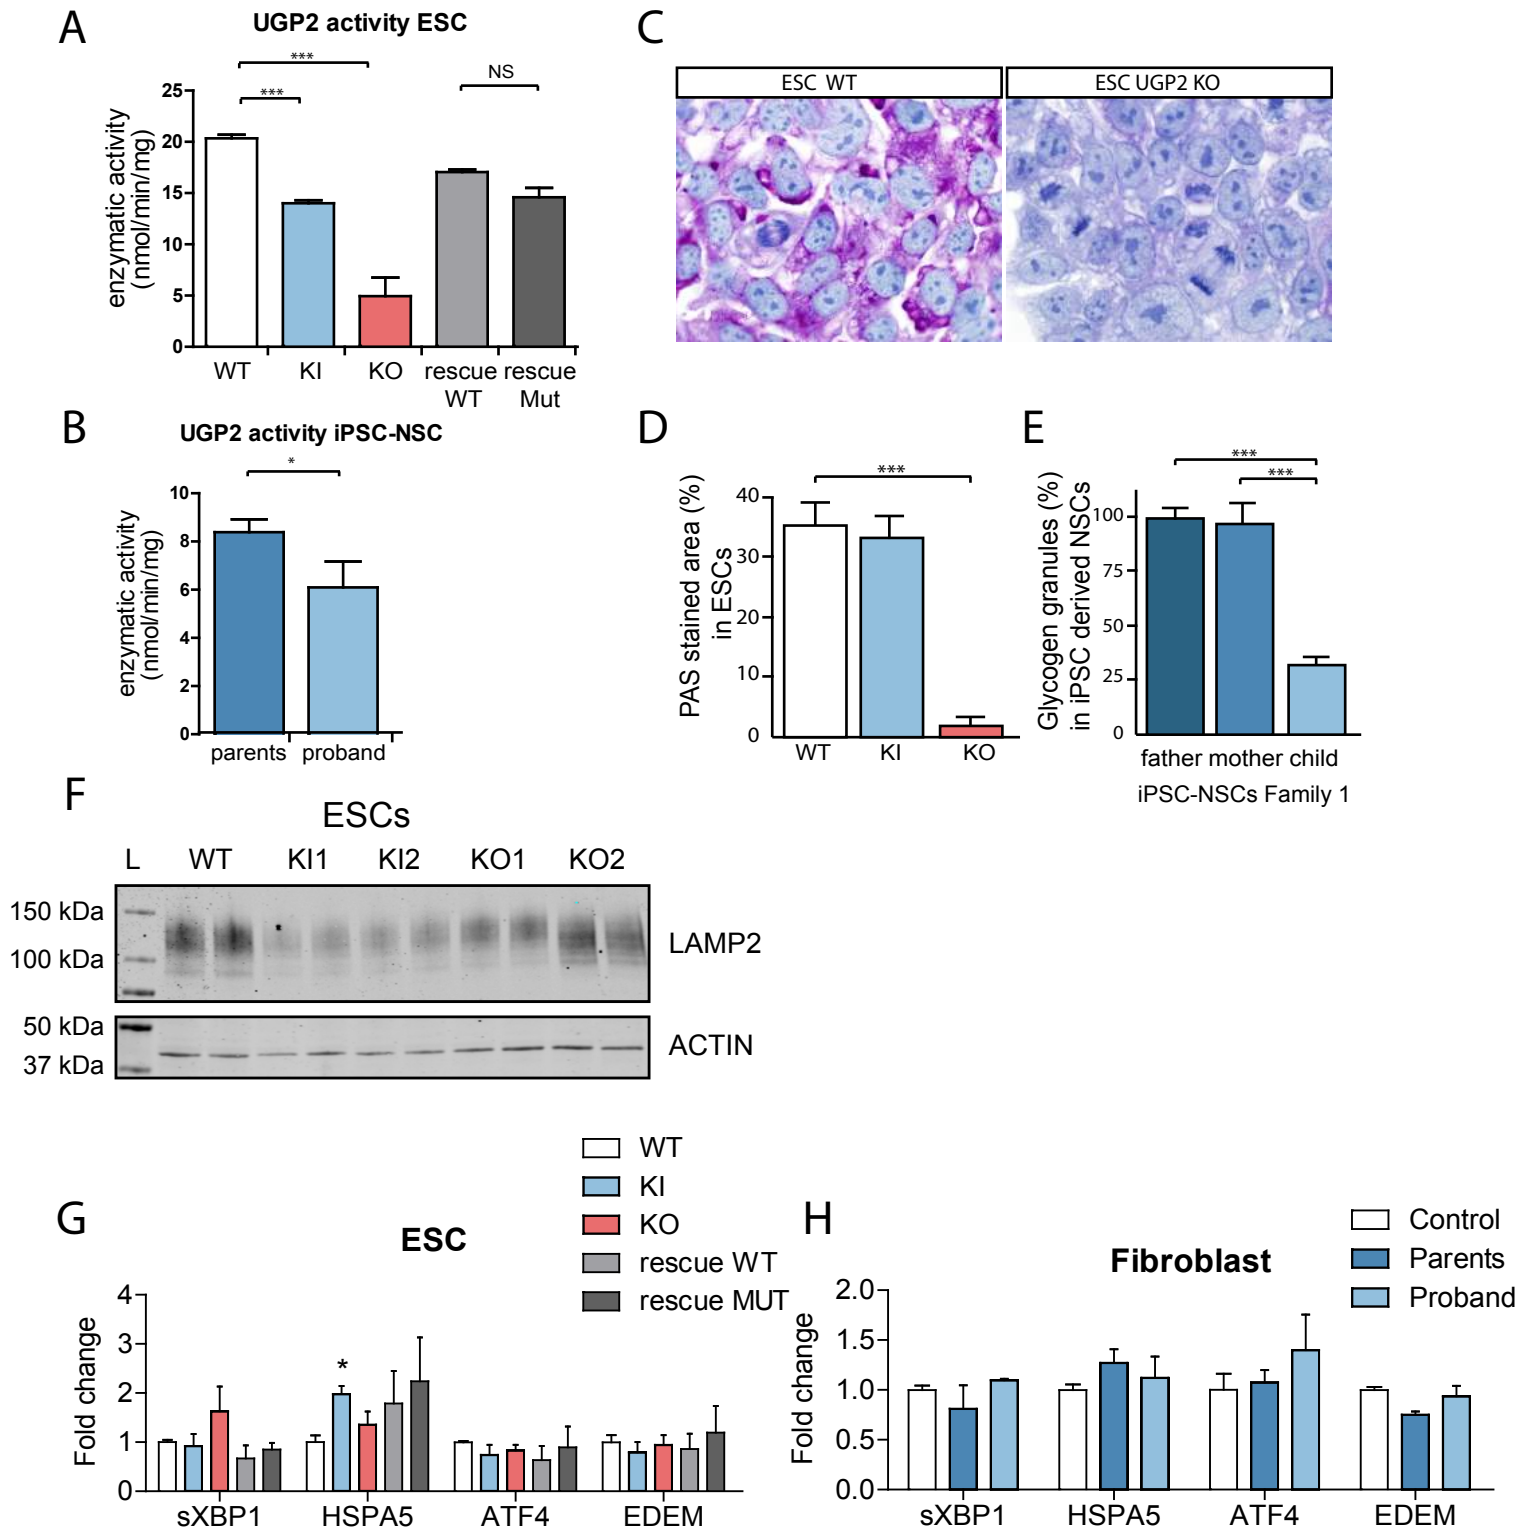

Source: https://www.biorxiv.org/content/biorxiv/early/2019/10/10/799841.full.pdf
